# Supplementary material for: Exercise for people living with frailty and receiving haemodialysis: a mixed-methods randomised controlled feasibility study
Source: PubMed Central journal article supplement (PMC7640592; doi:10.1136/bmjopen-2020-041227), 2020-11-03
Supplement: bmjopen-2020-041227.draft_revisions.pdf [file bmjopen-2020-041227.draft_revisions.pdf]

# BMJ Open

BMJ Open is committed to open peer review. As part of this commitment we make the peer review history of every article we publish publicly available.

When an article is published we post the peer reviewers' comments and the authors' responses online. We also post the versions of the paper that were used during peer review. These are the versions that the peer review comments apply to.

The versions of the paper that follow are the versions that were submitted during the peer review process. They are not the versions of record or the final published versions. They should not be cited or distributed as the published version of this manuscript.

BMJ Open is an open access journal and the full, final, typeset and author-corrected version of record of the manuscript is available on our site with no access controls, subscription charges or pay-per-view fees (<http://bmjopen.bmj.com>).

If you have any questions on BMJ Open's open peer review process please email [info.bmjopen@bmj.com](mailto:info.bmjopen@bmj.com)

# BMJ Open

## Exercise for people living with frailty and receiving haemodialysis: a mixed-methods randomised controlled feasibility study.

|                               |                                                                                                                                                                                                                                                                                                                                                                                                                                                                                                                                                                                                                                                                                                                                                                                                                                                                                                                                                                                                                                                                                                                                                                                                                                                                                                                                                                                                                                                                                                                                                                                                                                                                                                                                                                                                                                                                                     |
|-------------------------------|-------------------------------------------------------------------------------------------------------------------------------------------------------------------------------------------------------------------------------------------------------------------------------------------------------------------------------------------------------------------------------------------------------------------------------------------------------------------------------------------------------------------------------------------------------------------------------------------------------------------------------------------------------------------------------------------------------------------------------------------------------------------------------------------------------------------------------------------------------------------------------------------------------------------------------------------------------------------------------------------------------------------------------------------------------------------------------------------------------------------------------------------------------------------------------------------------------------------------------------------------------------------------------------------------------------------------------------------------------------------------------------------------------------------------------------------------------------------------------------------------------------------------------------------------------------------------------------------------------------------------------------------------------------------------------------------------------------------------------------------------------------------------------------------------------------------------------------------------------------------------------------|
| Journal:                      | <i>BMJ Open</i>                                                                                                                                                                                                                                                                                                                                                                                                                                                                                                                                                                                                                                                                                                                                                                                                                                                                                                                                                                                                                                                                                                                                                                                                                                                                                                                                                                                                                                                                                                                                                                                                                                                                                                                                                                                                                                                                     |
| Manuscript ID                 | bmjopen-2020-041227                                                                                                                                                                                                                                                                                                                                                                                                                                                                                                                                                                                                                                                                                                                                                                                                                                                                                                                                                                                                                                                                                                                                                                                                                                                                                                                                                                                                                                                                                                                                                                                                                                                                                                                                                                                                                                                                 |
| Article Type:                 | Original research                                                                                                                                                                                                                                                                                                                                                                                                                                                                                                                                                                                                                                                                                                                                                                                                                                                                                                                                                                                                                                                                                                                                                                                                                                                                                                                                                                                                                                                                                                                                                                                                                                                                                                                                                                                                                                                                   |
| Date Submitted by the Author: | 03-Jun-2020                                                                                                                                                                                                                                                                                                                                                                                                                                                                                                                                                                                                                                                                                                                                                                                                                                                                                                                                                                                                                                                                                                                                                                                                                                                                                                                                                                                                                                                                                                                                                                                                                                                                                                                                                                                                                                                                         |
| Complete List of Authors:     | <p>Young, Hannah; University of Leicester, Department of Respiratory Sciences; University Hospitals of Leicester NHS Trust, Department of Research and Innovation</p> <p>March, Daniel; University of Leicester, Department of Cardiovascular Sciences</p> <p>Highton, Patrick; University of Leicester, Department of Cardiovascular Sciences; Loughborough University, National Centre for Sport and Exercise Medicine</p> <p>Graham-Brown, Matthew ; University of Leicester, Cardiovascular Sciences; Loughborough University, National Centre for Sport and Exercise Medicine</p> <p>Churchward, Darren; University of Leicester, Department of Cardiovascular Sciences</p> <p>Grantham, Charlotte; University of Leicester, Department of Cardiovascular Sciences</p> <p>Goodliffe, Samantha; University of Leicester, Department of Health Sciences</p> <p>Jones, William; University Hospitals of Leicester, Emergency Department, Leicester Royal Infirmary,</p> <p>Cheung, Mei-Mei; University Hospitals of Leicester, Renal, Respiratory and Cardiovascular Clinical Management Group</p> <p>Greenwood, Sharlene ; King's College Hospital, Department of Physiotherapy and Renal Medicine; King's College London, Department of Renal Medicine</p> <p>Eborall, Helen; University of Leicester, Department of Health Sciences</p> <p>Conroy, Simon; University of Leicester, Department of Health Sciences</p> <p>Singh, Sally; Leicester Biomedical Research Unit, Centre for Exercise &amp; Rehabilitation Science; University Hospitals of Leicester NHS Trust, Department of Respiratory Medicine, Glenfield Hospital</p> <p>Smith, Alice; University of Leicester, Department of Health Sciences</p> <p>Burton, James; University of Leicester, Department of Cardiovascular Sciences; Loughborough University, National Centre for Sport and Exercise Medicine</p> |
| Keywords:                     | Dialysis < NEPHROLOGY, End stage renal failure < NEPHROLOGY, REHABILITATION MEDICINE                                                                                                                                                                                                                                                                                                                                                                                                                                                                                                                                                                                                                                                                                                                                                                                                                                                                                                                                                                                                                                                                                                                                                                                                                                                                                                                                                                                                                                                                                                                                                                                                                                                                                                                                                                                                |
|                               |                                                                                                                                                                                                                                                                                                                                                                                                                                                                                                                                                                                                                                                                                                                                                                                                                                                                                                                                                                                                                                                                                                                                                                                                                                                                                                                                                                                                                                                                                                                                                                                                                                                                                                                                                                                                                                                                                     |

1  
2  
3  
4  
5  
6  
7  
8  
9  
10  
11  
12  
13  
14  
15  
16  
17  
18  
19  
20  
21  
22  
23  
24  
25  
26  
27  
28  
29  
30  
31  
32  
33  
34  
35  
36  
37  
38  
39  
40  
41  
42  
43  
44  
45  
46  
47  
48  
49  
50  
51  
52  
53  
54  
55  
56  
57  
58  
59  
60

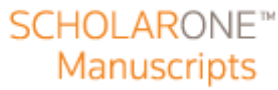

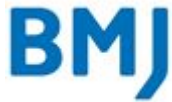

I, the Submitting Author has the right to grant and does grant on behalf of all authors of the Work (as defined in the below author licence), an exclusive licence and/or a non-exclusive licence for contributions from authors who are: i) UK Crown employees; ii) where BMJ has agreed a CC-BY licence shall apply, and/or iii) in accordance with the terms applicable for US Federal Government officers or employees acting as part of their official duties; on a worldwide, perpetual, irrevocable, royalty-free basis to BMJ Publishing Group Ltd ("BMJ") its licensees and where the relevant Journal is co-owned by BMJ to the co-owners of the Journal, to publish the Work in this journal and any other BMJ products and to exploit all rights, as set out in our [licence](#).

The Submitting Author accepts and understands that any supply made under these terms is made by BMJ to the Submitting Author unless you are acting as an employee on behalf of your employer or a postgraduate student of an affiliated institution which is paying any applicable article publishing charge ("APC") for Open Access articles. Where the Submitting Author wishes to make the Work available on an Open Access basis (and intends to pay the relevant APC), the terms of reuse of such Open Access shall be governed by a Creative Commons licence – details of these licences and which [Creative Commons](#) licence will apply to this Work are set out in our licence referred to above.

Other than as permitted in any relevant BMJ Author's Self Archiving Policies, I confirm this Work has not been accepted for publication elsewhere, is not being considered for publication elsewhere and does not duplicate material already published. I confirm all authors consent to publication of this Work and authorise the granting of this licence.

1  
2  
3  
4 1 **Exercise for people living with frailty and receiving haemodialysis: a mixed-**  
5  
6  
7 2 **methods randomised controlled feasibility study.**  
8  
9  
10 3

11  
12 4 Hannah ML Young (MSc)<sup>1,2</sup>, Daniel S March (PhD)<sup>3</sup>, Patrick J Highton (PhD)<sup>3,4</sup>, Matthew  
13  
14 5 PM Graham-Brown (PhD)<sup>3,4</sup>, Darren C Churchward (MSc)<sup>3</sup>, Charlotte Grantham (BSc)<sup>3</sup>, S  
15  
16 6 Goodliffe (MSc)<sup>5</sup>, William Jones (BAHons)<sup>6</sup>, Mei-Mei Cheung (BAHons)<sup>7</sup>, Sharlene A  
17  
18 7 Greenwood (PhD)<sup>8</sup>, Helen Eborall (PhD)<sup>9</sup>, Simon Conroy (PhD)<sup>5</sup>, Sally J Singh (PhD)<sup>10,11</sup>,  
19  
20 8 Alice C Smith (PhD)<sup>5</sup>, James O Burton (MD)<sup>3,4</sup>.

21  
22  
23  
24  
25 9 <sup>1</sup>Department of Respiratory Sciences, University of Leicester, Leicester, UK.

26  
27  
28 10 <sup>2</sup>Department of Research and Innovation, University Hospitals of Leicester, UK

29  
30  
31 11 <sup>3</sup>Cardiovascular Sciences, University of Leicester, UK.

32  
33  
34 12 <sup>4</sup>National Centre for Sport and Exercise Medicine, Loughborough University, UK.

35  
36  
37 13 <sup>5</sup>Department of Health Sciences, University of Leicester, UK.

38  
39  
40 14 <sup>6</sup> Emergency Department, Leicester Royal Infirmary, University Hospitals of Leicester, UK.

41  
42  
43 15 <sup>7</sup> Renal, Respiratory and Cardiovascular Clinical Management Group, University Hospitals of  
44  
45 16 Leicester, UK.

46  
47  
48 17 <sup>8</sup>Department of Physiotherapy and Renal Medicine, King's College Hospital and Department  
49  
50 18 of Renal Medicine, King's College London, UK.

51  
52  
53 19 <sup>9</sup>Social Science Applied to Healthcare Improvement Research (SAPPHIRE) Group,  
54  
55 20 Department of Health Sciences, University of Leicester, UK.  
56  
57  
58  
59  
60

1  
2  
3 21 <sup>10</sup>Centre for Exercise & Rehabilitation Science, Leicester Biomedical Research Unit,  
4  
5 22 Glenfield Hospital, UK.  
6  
7

8 23 <sup>11</sup>Department of Respiratory Medicine, Glenfield Hospital, University Hospitals of  
9  
10 24 Leicester,UK.  
11  
12

13  
14 25

15  
16 26 Corresponding author:

17  
18  
19 27 Hannah Young

20  
21  
22 28 Leicester Kidney Lifestyle Team

23  
24  
25 29 Academic Unit

26  
27  
28 30 Leicester General Hospital

29  
30  
31 31 Gwendolen Road

32  
33  
34 32 Leicester

35  
36  
37 33 UK

38  
39  
40 34 LE4 5PW

41  
42  
43 35 0116 258 4346

44  
45  
46 36 hmly1@le.ac.uk

47  
48  
49 37

50  
51  
52 38 Running title: Exercise for frail haemodialysis patients

53  
54  
55 39 Abstract word count: 268

56  
57  
58 40 Word count: 4300

59  
60

1  
2  
3 41 **ABSTRACT**  
4  
5

6 42 **Objectives**  
7  
8

9 43 Frailty is highly prevalent in haemodialysis (HD) patients, leading to poor outcomes. This  
10  
11 44 study aimed to determine whether a Randomised Controlled Trial (RCT) of intradialytic  
12  
13 45 exercise is feasible for frail HD patients, and explore how the intervention may be tailored to  
14  
15  
16 46 their needs.  
17

18  
19 47 **Design**  
20

21  
22 48 Mixed-methods feasibility.  
23  
24

25 49 **Setting & participants**  
26  
27

28 50 Prevalent adult HD patients of the *CYCLE-HD* trial with a Clinical Frailty Scale Score of 4-7  
29  
30 51 (vulnerable to severely frail) were eligible for the feasibility study.  
31  
32

33 52 **Interventions**  
34  
35

36 53 Participants in the exercise group undertook six-months of thrice-weekly, progressive,  
37  
38 54 moderate intensity intradialytic cycling (IDC).  
39  
40

41 55 **Outcomes**  
42  
43

44 56 Primary outcomes were related to feasibility. Secondary outcomes were falls incidence,  
45  
46 57 exercise capacity, physical function, physical activity and patient-reported outcomes  
47  
48 58 (PROMS) at baseline and six months. Acceptability of trial procedures and the intervention  
49  
50 59 were explored via diaries and interviews with n=25 frail HD patients who both participated in  
51  
52 60 (n=13, 52%), and declined (n=12, 48%), the trial.  
53  
54  
55

56 61 **Results**  
57  
58  
59  
60

1  
2  
3 62 124 (31%) patients were eligible, 64 (52%) consented and 51 (80%) completed a baseline  
4  
5 63 assessment. N=24 (71% male; 59 ± 13 years) dialysed during shifts randomly assigned to  
6  
7 64 exercise and n=27 (81% male; 65 ± 11) assigned to usual care. N=6 (12%) were lost to  
8  
9 65 follow-up. The exercise group completed 74% of sessions. 27 to 89% of secondary outcome  
10  
11 66 data were missing. Frail HD patients outlined several ways to enhance trial procedures.  
12  
13 67 Maintaining ability to undertake activities of daily living and social participation were  
14  
15 68 outcomes of primary importance. Participants desired a varied exercise programme.  
16  
17  
18  
19

## 20 69 **Conclusions**

21  
22  
23 70 A definitive RCT is feasible, however a comprehensive exercise programme may be more  
24  
25 71 efficacious than IDC in this population.  
26  
27

## 28 72 **Trial Registration**

29  
30  
31 73 ISRCTN11299707; ISRCTN12840463  
32  
33  
34  
35  
36  
37

38 75 **Keywords:** feasibility; frailty; exercise; haemodialysis; mixed-methods.  
39  
40  
41  
42  
43  
44  
45  
46  
47  
48  
49  
50  
51  
52  
53  
54  
55  
56  
57  
58  
59  
60



## 76 **STRENGTHS AND LIMITATIONS OF THIS STUDY**

- 77 • To our knowledge, this is the first study to evaluate the feasibility of an exercise  
78 intervention for people living with frailty and receiving haemodialysis (HD).
- 79 • The Clinical Frailty Scale, a frailty risk-stratification measure which has been  
80 validated in an HD population, was used to identify eligible participants.
- 81 • This study is also the first to explore how trial procedures and exercise programmes  
82 should be specifically tailored to the needs of people living with frailty and receiving  
83 HD, from their own perspectives.
- 84 • Multiple qualitative methods (interviews and diaries) were used to explore  
85 participants perceptions, providing a form of triangulation which strengthens the  
86 conclusions made.
- 87 • Due to the nature of the intervention and resource limitations, we could not blind  
88 intervention providers, outcome assessors or study participants to group allocation.

## 89 INTRODUCTION

90 Frailty, “a multidimensional syndrome of decreased physiological reserve leading to  
91 increased vulnerability to minor health stressors”, is highly prevalent within the  
92 haemodialysis (HD) population<sup>1,2</sup>. Increasing frailty is associated with worsening outcomes,  
93 including mortality, hospitalisation, falls, reduced Health-Related Quality of Life (HRQoL),  
94 psychological well-being, physical function, ability to undertake activities of daily living  
95 (ADLs) and increased symptom burden<sup>3-5</sup>.

96  
97 Despite this, frailty is not static and evidence suggests that some factors associated with  
98 frailty are amenable to change<sup>6</sup>. Whilst the possible mediating role of exercise has been  
99 discussed, to our knowledge no original studies have examined the feasibility or effectiveness  
100 of an exercise programme for people living with frailty and receiving HD<sup>7</sup>. To date, exercise  
101 interventions for HD patients have focused upon intradialytic exercise, most commonly  
102 delivered by means of a cycle ergometer (intradialytic cycling, IDC), yet little is known about  
103 whether this is the most appropriate training stimulus for frail HD patients<sup>8</sup>. In addition, HD  
104 treatment can be poorly tolerated by frail patients and therefore IDC may represent an  
105 additional stressor to which these patients are particularly vulnerable<sup>9</sup>. European renal best  
106 practice guidance highlights a need for studies which identify how exercise programmes  
107 should be more specifically tailored to the needs of frail CKD patients<sup>10</sup>, yet to date, there has  
108 also been no exploration of the needs, barriers and facilitators to exercise from the  
109 perspectives of people living with frailty and receiving HD themselves.

110  
111 The aim of this study was to determine the feasibility of conducting an RCT investigating the  
112 effects of IDC for HD patients living with frailty by: (i) estimating rates of eligibility,

1  
2  
3 113 recruitment, retention, exercise adherence and outcome acceptability; and exploring (ii) the  
4  
5 114 potential benefits of IDC across a range of secondary outcomes; and (iii) the perceptions of  
6  
7  
8 115 frail HD patients in relation to participating in clinical research, IDC and a tailored exercise  
9  
10 116 intervention.

11  
12  
13 117

## 14 15 16 118 **METHODS**

### 17 18 19 119 **Design**

20  
21  
22 120 A mixed-methods, prospective, randomised feasibility study was conducted alongside  
23  
24 121 concurrent qualitative diaries and interviews (Trial Registration numbers ISRCTN11299707;  
25  
26 122 ISRCTN12840463). The feasibility study was a secondary analysis of the *CYCLE-HD* trial,  
27  
28  
29 123 whose aims and methods are reported elsewhere<sup>11</sup>. The qualitative component was  
30  
31 124 underpinned by a constructivist Grounded Theory approach<sup>12</sup>. All participants provided  
32  
33 125 written informed consent.

34  
35  
36 126

### 37 38 39 127 **Participants**

40  
41  
42 128 Prevalent adult (over 18 years) HD patients were recruited from three centres within the UK  
43  
44 129 East Midlands Renal Network. In addition to the inclusion and exclusion criteria for the  
45  
46  
47 130 *CYCLE-HD* trial (supplementary material 1), the Clinical Frailty Scale (CFS), a risk  
48  
49 131 stratification tool validated in a HD population, was used to identify vulnerable to severely  
50  
51 132 frail participants (CFS score 4-7)<sup>13</sup>. The inclusion and exclusion criteria for the qualitative  
52  
53  
54 133 component mirrored the feasibility study and both those involved in the trial, and those who  
55  
56 134 were eligible but declined to participate were eligible.

57  
58  
59 135  
60

1  
2  
3 136 **Randomisation**  
4  
5

6 137 HD cohorts were randomised prior to screening, based on a computer-generated  
7  
8 138 randomisation algorithm held by the Robertson Centre for Biostatistics at the University of  
9  
10 139 Glasgow.  
11  
12

13  
14 140

15  
16 141 **Recruitment**  
17  
18

19 142 Patients were screened for eligibility by their supervising nephrologist. Suitable patients were  
20  
21 143 approached during HD, and the study explained. For the qualitative component, participants  
22  
23 144 who had been involved in the feasibility study were recruited following completion of, or  
24  
25 145 withdrawal from, the trial to prevent contamination.  
26  
27  
28

29 146

30  
31  
32 147 **Exercise intervention**  
33  
34

35 148 Supplementary material 2 outlines the exercise intervention in line with TIDieR guidance<sup>14</sup>.  
36  
37 149 Briefly, following a one-month run-in, participants in the exercise group undertook thrice-  
38  
39 150 weekly supervised, moderate-intensity (Rating of Perceived Exertion, RPE 12-14) IDC  
40  
41 151 (MOTomed Letto2, Reck, Germany), for six months<sup>15</sup>. Cycling resistance was progressively  
42  
43 152 increased to maintain RPE in response to exercise adaptation. Both arms continued with usual  
44  
45 153 care HD as described elsewhere<sup>11</sup>.  
46  
47  
48

49 154

50  
51  
52 155 **Sample size**  
53  
54

55 156 Determinations of sample size from a power calculation around a primary outcome are not  
56  
57 157 relevant to a feasibility study and sample sizes of 24-50 are considered sufficient<sup>16</sup>. For the  
58  
59  
60

1  
2  
3 158 qualitative component maximum variation sampling was initially used to ensure diversity in  
4  
5 159 frailty status and level of trial participation<sup>12</sup>. As understanding was gained from preliminary  
6  
7 160 analyses, theoretical sampling was used to further recruit participants<sup>12</sup>. A maximum of 30  
8  
9 161 interviews were planned, but data collection ceased at the point where theoretical categories  
10  
11 162 were saturated and no longer generated new insight (n=25).  
12  
13  
14  
15  
16  
17

163

### 164 **Primary outcome measures**

165 The primary feasibility outcomes are presented in supplementary material 3. Judgement  
166 regarding feasibility was based upon a set of *a priori* progression criteria. For each criterion,  
167 the development of ‘stop’ (indicating when there are issues with the trial that cannot be  
168 resolved) and ‘go’ thresholds (when there are no issues that may impede the success of a  
169 trial) were co-produced by patients, clinicians and researchers<sup>17,18</sup>. Results falling between  
170 these thresholds indicated that adaptation to trial procedures may render a definitive RCT  
171 viable<sup>18</sup>.  
172

172

### 173 **Baseline demographic and clinical variables**

174 Demographic and clinical characteristics were gathered from participants’ medical notes. The  
175 Charlson Comorbidity Index (CCI) was used to estimate the burden of comorbid disease<sup>19</sup>.  
176

176

### 177 **Secondary outcome measures**

178 Multiple secondary outcomes were used to determine the potential effects of IDC and most  
179 appropriate primary endpoint for a future RCT. Outcome assessors were not blinded to group  
180 allocation.

1  
2  
3 181  
4  
5  
6 182 Information on the number of falls, defined as ‘an unexpected event in which the participants  
7  
8 183 come to rest on the ground, floor, or lower-level’ which resulted in Emergency Department  
9  
10 184 visits and hospital admissions were collected from baseline to one year following intervention  
11  
12  
13 185 completion from medical records and hospital episode statistics<sup>20</sup>.

14  
15  
16 186  
17  
18  
19 187 Field tests of exercise capacity and physical function included the Incremental Shuttle Walk  
20  
21 188 Test (ISWT), the Endurance Shuttle Walk Test (ESWT), the Short Physical Performance  
22  
23 189 Battery (SPPB) and the Sit-to Stand in Sixty Seconds (STS60)<sup>11</sup>. Physical activity (PA) was  
24  
25 190 objectively measured using the SenseWear Armband (SWA) Pro 3 (BodyMedia, Inc.,  
26  
27 191 Pittsburgh PA, USA) for seven consecutive days, including HD. Established criteria were  
28  
29 192 used to ensure representative data for average daily wear-time, steps per day, and time  
30  
31 193 (minutes per day) spent in sedentary (defined as 0-1.5 METS), light (1.6-2.9 METS)  
32  
33 194 moderate (3-6 METS) and vigorous (>6 METS) PA<sup>21</sup>. PROMs collected are outlined in  
34  
35 195 supplementary material 4<sup>11</sup>. All outcomes were collected at baseline and six months.

36  
37  
38  
39  
40 196  
41  
42  
43 197 Serious adverse events (SAEs) were recorded and assessed from baseline to six-months as  
44  
45 198 outlined previously<sup>11</sup>.

46  
47  
48  
49 199

## 50 51 200 **Diaries and interviews**

52  
53  
54 201 Participants first completed a prospective falls diary, recognised as the current ‘gold  
55  
56 202 standard’ for falls data collection, for up to three months to examine the feasibility of this  
57  
58 203 outcome measure within a future definitive RCT<sup>20</sup>. Semi-structured interviews then explored  
59  
60

1  
2  
3 204 participants' experiences of: (i) keeping a falls diary; (ii) participating in a trial; and (iii) their  
4  
5 205 perceptions of IDC and a tailored exercise intervention.  
6  
7

8 206  
9

10  
11 207 Information to support diary collection and a topic guide for the interviews (supplementary  
12  
13 208 material 5) was developed by HMLY, HE and a patient and public involvement group.  
14  
15 209 Topics were tailored according to the level of involvement in the trial, and the content of  
16  
17 210 diaries. Interviews were conducted during HD, in the participant's home, or in the hospital by  
18  
19 211 HMLY and lasted 20 to 120 minutes (mean 63 minutes). All were digitally audio-recorded  
20  
21 212 and transcribed verbatim.  
22  
23  
24  
25

26 213  
27

## 28 214 **Data analysis**

29  
30  
31 215 Descriptive statistics and confidence intervals were used to estimate feasibility outcomes<sup>23</sup>.  
32  
33 216 The percentage of exercise sessions completed was used to establish the acceptability of IDC.  
34  
35 217 Outcome acceptability was determined by quantifying the amount of missing data across  
36  
37 218 secondary outcomes. No imputation was performed to account for missing data. No statistical  
38  
39 219 testing relating to the efficacy of the exercise intervention was undertaken, although the  
40  
41 220 potential benefits of exercise were estimated<sup>23</sup>. For falls, incident rate ratio and 95%  
42  
43 221 confidence intervals were presented. Statistical analyses were performed using SPSS 24  
44  
45 222 (IBM UK Ltd, UK).  
46  
47  
48  
49

50 223  
51  
52

53 224 Qualitative analysis was undertaken by HMLY and SG and informed by a constant  
54  
55 225 comparative approach<sup>12</sup>. Transcripts were reviewed, then coded line by line, followed by  
56  
57 226 focused, and then theoretical, coding<sup>12</sup>. NVivo11 software (QSR International Ltd, version  
58  
59  
60

1  
2  
3 227 11, 2016) was used to facilitate data management. Finally, qualitative and quantitative results  
4  
5 228 were merged in a 'joint display' to facilitate an overall assessment of feasibility<sup>24</sup>.  
6  
7

8 229  
9

## 10 11 230 **Patient and public involvement**

12  
13  
14 231 The patient and public involvement (PPI) group for this study comprised patients of all ages,  
15  
16 232 genders and ethnicities who were living with frailty and receiving HD, and their relatives.  
17  
18 233 They agreed this study was an important priority for further investigation and particularly  
19  
20 234 stressed the need to add the qualitative component. The PPI group were involved early in  
21  
22 235 ethical approval stages and were actively engaged in writing lay summaries and providing  
23  
24 236 patient perspectives on data collection procedures, ethical issues, and the study dissemination  
25  
26 237 plans. They assisted in the preparation of study documentation, interview topic guides and  
27  
28 238 diary keeping materials. During the study, members of the PPI group attended regular  
29  
30 239 steering meetings and were involved in co-producing the progression criteria.  
31  
32  
33  
34  
35  
36 240  
37

## 38 241 **RESULTS**

### 39 242 **Feasibility study**

#### 40 243 *Eligibility and recruitment*

41  
42  
43  
44 244 Screening and recruitment took place from March 2015 to 2018, with data collection  
45  
46 245 completed by November 2018. Figure 1 outlines the trial CONSORT. Of the 406 patients  
47  
48 246 screened in the *CYCLE-HD* trial, n=124 (30%, 95% CI 26.1% to 35.3%) were identified as  
49  
50 247 vulnerable to severely frail and therefore eligible for the feasibility study. Sixty-four  
51  
52 248 participants (52%, 95% CI 42.5% to 60.7%) consented. Reasons for declining were lack of  
53  
54 249 time or family support and reluctance to undergo outcome testing, or to be randomised.  
55  
56  
57  
58  
59  
60



1  
2  
3 250 Thirteen (20%, 95% CI 11.3% to 32.2%) participants withdrew prior to baseline assessment.

4  
5 251 N=51 (80%, 95% CI 67.8% to 88.7%) completed this assessment. Twenty-four (47%)

6  
7  
8 252 participants received dialysis during shifts randomised to exercise and twenty-seven (53%)

9  
10 253 during shifts randomised to usual care.

11  
12  
13 254

14  
15  
16 255 *Participant characteristics*

17  
18 256 Table 1 displays the characteristics of the trial participants at baseline. Groups were well

19  
20 257 matched across most variables. A lower proportion of participants were female (23.5%) and

21  
22 258 severely frail (6%) overall.

259 *Table 1. Baseline demographic and clinical characteristics of the trial participants.*

|                                   |                              | Usual care<br>(n=27) | Exercise<br>(n=24) | All<br>(n=51)   |
|-----------------------------------|------------------------------|----------------------|--------------------|-----------------|
| <b>Age (years)</b>                |                              | 65 ± 11              | 59 ± 13            | 63 ± 12         |
| <b>Sex (n, %)</b>                 | Female                       | 5 (19%)              | 7 (29%)            | 12 (23.5%)      |
| <b>Ethnicity (n, %)</b>           | White                        | 12 (44%)             | 11 (41%)           | 23 (45%)        |
|                                   | Asian or Asian<br>British    | 11 (41%)             | 11 (46%)           | 22 (43%)        |
|                                   | Caribbean                    | 1 (4%)               | 0 (0%)             | 1 (2%)          |
|                                   | Other ethnic                 | 1 (4%)               | 1 (4%)             | 2 (4%)          |
|                                   | Not stated                   | 2 (7%)               | 1 (4%)             | 3 (6%)          |
| <b>Diagnosis (n, %)</b>           | Aetiology<br>Uncertain       | 8 (29%)              | 7 (29%)            | 15 (29%)        |
|                                   | Diabetic<br>Nephropathy      | 5 (19%)              | 7 (29%)            | 12 (23%)        |
|                                   | Glomerulonephritis           | 5 (19%)              | 3 (14%)            | 8 (16%)         |
|                                   | Renal Vascular<br>Disease    | 3 (11%)              | 2 (8%)             | 5 (10%)         |
|                                   | Other diagnoses              | 4 (15%)              | 1 (4%)             | 5 (10%)         |
|                                   | Chronic<br>Pyelonephritis    | 2 (7%)               | 1 (4%)             | 3 (6%)          |
|                                   | Polycystic Kidney<br>Disease | 0 (0%)               | 2 (8%)             | 2 (4%)          |
|                                   | Not recorded                 | 0 (0%)               | 1 (4%)             | 1 (2%)          |
| <b>CCI</b>                        |                              | 5 ± 2                | 5 ± 2              | 5 ± 2           |
| <b>Previous transplant (n, %)</b> | No                           | 21 (75%)             | 18 (75%)           | 39 (76.5%)      |
|                                   | Yes                          | 6 (21%)              | 6 (25%)            | 12 (23.5%)      |
| <b>Time on HD (months)</b>        |                              | 17 (7-53)            | 13 (10-61)         | 16 (8-53)       |
| <b>BMI (kg/m<sup>2</sup>)</b>     |                              | 27.38 ±<br>6.72      | 25.87 ±<br>5.28    | 26.67 ±<br>6.07 |
|                                   |                              |                      |                    |                 |
| <b>Total no. medications</b>      |                              | 12 ± 4               | 12 ± 4             | 12 ± 4          |
| <b>Clinical Information</b>       | Albumin (g/L)                | 35.4 ± 4.4           | 37.4 ± 4.3         | 36.4 ± 4.4      |
|                                   | Haemoglobin (g/L)            | 107 ± 12             | 112 ± 17           | 107 ± 15        |
| <b>Haemodialysis</b>              | URR (%)*                     | 74 (70-80)           | 75 (58-79)         | 74 (71-79)      |
|                                   | SBP (mmHg)                   | 143 ± 21             | 144 ± 21           | 144 ± 21        |
|                                   | DBP (mmHg)*                  | 65 (62-78)           | 78 (69-86)         | 76 (62-81)      |
| <b>CFS (n, %)</b>                 | Vulnerable                   | 13 (48%)             | 10 (42%)           | 23 (45%)        |
|                                   | Mildly frail                 | 5 (18.5%)            | 7 (29%)            | 12 (23.5%)      |
|                                   | Moderately frail             | 8 (30%)              | 5 (21%)            | 13 (25.5%)      |
|                                   | Severely frail               | 1 (3.5%)             | 2 (8%)             | 3 (6%)          |

260 *Values reported are mean and SD (±), except for \*median and IQR. Abbreviations: BMI, body mass*  
 261 *index; CCI, Charlson Comorbidity Index; CFS, Clinical Frailty Scale DBP, diastolic blood pressure;*  
 262 *SBP, systolic blood pressure; URR, urea reduction ratio*

263 *Retention*

264 Six (12%, 95% CI 4.4% to 23.9%) participants were lost to follow-up: three participants  
 265 withdrew due to ill-health, one moved away, one changed HD regime and one withdrew  
 266 consent.

267

268 *Exercise adherence*

269 A mean of  $61 \pm 17$  exercise sessions were completed over the six-month intervention,  
 270 representing an adherence rate of  $74 \pm 20\%$ . The most frequent reasons for missing an exercise  
 271 session were declining ( $n= 175$  out of 535 sessions omitted in total, 33%), feeling unwell ( $n=$   
 272 116, 22%) and pain ( $n= 105$ , 20%). Table 2 summarises the mean amount of exercise  
 273 achieved. On average, participants reached the prescribed level of exercise by six months,  
 274 although  $n=18$  (75%) were unable to achieve this by the end of the one-month run-in period.

275 *Table 2 Mean (SD) exercise achieved per session over the six-month duration of the*  
 276 *intervention.*

|                            |             |
|----------------------------|-------------|
| Duration (mins)            | $35 \pm 8$  |
| Speed (RPM)                | $63 \pm 10$ |
| Intensity (RPE)            | $13 \pm 1$  |
| Gear                       | $9 \pm 4$   |
| Distance (Miles)           | $7 \pm 3$   |
| <b>Power (Watts)</b>       | $13 \pm 6$  |
| Energy expenditure (Kcals) | $64 \pm 31$ |

277 *All data presented as mean and SD ( $\pm$ ). Abbreviations: kcals, kilocalories, mins, minutes; RPE, rating*  
 278 *of perceived exertion; RPM, revolutions per minute.*

279

280 *Outcome acceptability*

281 For tests of exercise capacity (ISWT and ESWT);  $n=14$  (27%) did not complete at least one  
 282 test at baseline,  $n=30$  (64%) at interim and  $n=26$  (58%) at final. For tests of physical function;  
 283  $n=20$  (39%) did not complete at least one test at baseline,  $n=33$  (70%) at interim and  $n=30$   
 284 (67%) at final. For PROMs;  $n=27$  (53%) did not complete at least one questionnaire at

1  
2  
3 285 baseline, n=27 (57%) at interim and n=40 (89%) at final. For PA data; n=21 (41%) were  
4  
5 286 missing at baseline, and n=26 (58%) were missing at the final assessment. Declining was the  
6  
7 287 primary reason for non-completion for all outcomes across all time points.  
8  
9

10  
11 288

12  
13  
14 289 *Secondary outcomes*

15  
16 290 Summary falls data are presented in supplementary material 6. The crude falls incident rate  
17  
18 291 ratio (IRR) was 1.95 (95% CI 0.63 to 7.18), suggestive of an almost two-fold increased  
19  
20 292 incidence of falls within the usual care group.  
21  
22

23  
24 293

25  
26 294 Exercise capacity was maintained in the exercise group, but deteriorated in the usual care  
27  
28 295 group, resulting in an overall difference of 36m (95% CI -12 to 84) in ISWT results and 181  
29  
30 296 seconds (95% CI -92 to 453) in EWST time. The time taken to complete the STS5 also  
31  
32 297 increased in the usual care group (suggesting a deterioration in function), but was maintained  
33  
34 298 in the exercise group, resulting in an overall difference of 5 seconds (95% CI -4 to 15)  
35  
36 299 (supplementary material 7).  
37  
38  
39

40  
41 300

42  
43  
44 301 Step count increased in the exercise group by 859 steps/day (95%CI -825 to 2543) on HD  
45  
46 302 days and 888 steps/day (95%CI -84 to 1861) on non-HD days. Whilst sedentary time was  
47  
48 303 increased in the exercise group on all days compared with the usual care group, this appeared  
49  
50 304 to be offset by increases in light PA and moderate PA, and maintenance (albeit of low levels)  
51  
52 305 of vigorous PA versus maintenance or deterioration across the same metrics in the usual care  
53  
54 306 group (supplementary material 8). For PROMs, outcomes were largely unchanged, except for  
55  
56 307 the DASI score, which appeared to deteriorate in the exercise group and increase in the usual  
57  
58 308 care group, resulting in an overall difference in score of 4.93 (95% CI -0.94 to 10.80) and the  
59  
60

1  
2  
3 309 mental component summary score of the SF12 which improved in the usual care group,  
4  
5 310 resulting in an overall difference in score of 4 (95% CI -3 to 10). Exercisers appeared to have  
6  
7  
8 311 a greater perception of the benefits of exercise compared with those in the control group (3,  
9  
10 312 95% CI -4 to 11) (supplementary material 9).

11  
12  
13 313

14  
15  
16 314 *Serious adverse events*

17  
18 315 In total, n=13 (25%) experienced an SAE during the feasibility study, n=8 (33%) in the  
19  
20 316 exercise group and n=5 (19%) in the usual care group. All events resolved, and none were  
21  
22  
23 317 directly related to the intervention or trial.

24  
25  
26 318

27  
28  
29 319 **Qualitative findings**

30  
31  
32 320 Thirty-seven patients were approached for the qualitative study. Twenty-six were recruited  
33  
34 321 and one died prior to data collection. Thirteen had participated in the feasibility trial. Nine  
35  
36 322 received dialysis during shifts randomised to exercise, and four randomised to usual care.  
37  
38 323 Twelve participants had declined to take part in the feasibility trial. Full characteristics for the  
39  
40 324 qualitative sample are provided in supplementary material 10.

41  
42  
43  
44 325

45  
46  
47 326 In addition to categories relating to the feasibility outcomes, categories relating to both the  
48  
49 327 delivery and the characteristics of a tailored exercise intervention were identified. These are  
50  
51 328 presented alongside illustrative quotes within Tables 3, 4, 5 and 6 and Figure 2.

52  
53  
54 329

1  
2  
3 330 *Feasibility and acceptability of a definitive trial*  
4

5  
6 331 *Eligibility and recruitment*  
7

8 332 Declining to participate was underpinned by a perception that the trial could worsen overall  
9  
10 333 health, particularly amongst those who had not previously participated in research or had  
11  
12 334 recently commenced HD. Female participants believed that exercise was predominantly for  
13  
14 335 men and that they were already doing enough daily activity, whilst participants living with  
15  
16 336 moderate to severe frailty viewed ageing as an inevitable decline unlikely to be influenced by  
17  
18 337 exercise. Motivators included a sense of altruism, and the perception that participation could  
19  
20 338 provide opportunities to improve individual outcomes; learn about their own health; and  
21  
22 339 access better healthcare. Participants felt that recruitment could be enhanced by the effective  
23  
24 340 use of non-verbal communication, rapport building, and actively involving family members  
25  
26 341 in the recruitment process, as family support was often a prerequisite to participation (Table  
27  
28 342 3).  
29  
30  
31  
32  
33

34 343

35  
36  
37 344 *Trial retention*  
38

39 345 The primary reasons for withdrawal were becoming unwell, the duration of the trial and the  
40  
41 346 research not meeting participants expectations. Participants suggested that having a rapport  
42  
43 347 and maintaining regular dialogue with the research team might help retain participants within  
44  
45 348 a future trial (Table 3).  
46  
47  
48  
49  
50  
51  
52  
53  
54  
55  
56  
57  
58  
59  
60

1  
2  
3  
4  
5  
6  
7  
8  
9  
10  
11  
12  
13  
14  
15  
16  
17  
18  
19  
20  
21  
22  
23  
24  
25  
26  
27  
28  
29  
30  
31  
32  
33  
34  
35  
36  
37  
38  
39  
40  
41  
42  
43  
44  
45  
46  
47  
48  
49  
50  
51  
52  
53  
54  
55  
56  
57  
58  
59  
60

349 *Table 3. Categories relating to trial eligibility, recruitment and retention with illustrative*  
350 *quotes.*

For peer review only

1  
2  
3 351 *The acceptability of IDC*  
4

5 352 IDC was generally perceived to be a safe and positive use of HD treatment time. However,  
6  
7 353 IDC was described as limited in scope, and participants were uncertain of its impact,  
8  
9  
10 354 particularly upon mobility, symptoms and falls (Table 4).  
11  
12

13 355  
14  
15

16 356 *Table 4. Categories relating to the acceptability of IDC outcome acceptability and*  
17 357 *illustrative quotes.*  
18

19 358  
20  
21

22 359 *Outcome acceptability*  
23

24 360 As indicated by participant quotations in Table 5, the number of outcomes and follow-ups  
25  
26 361 needed to be reduced and participants had a strong preference for outcomes that could be  
27  
28 362 collected during HD treatment. Many found the ISWT and STS60 assessments too  
29  
30 363 challenging. Participants were occasionally uncertain of the purpose of the questionnaires and  
31  
32 364 many reported difficulty quantifying symptom severity or a desire to provide ‘anticipated’  
33  
34 365 responses.  
35  
36  
37  
38

39 366  
40  
41

42 367 Maintaining mobility, and the ability to undertake a range of ADLS and social roles were  
43  
44 368 viewed as key outcomes for a future trial. Only thirteen (52%) participants in the qualitative  
45  
46 369 study agreed to complete a falls diary and many reported they preferred falls information to  
47  
48 370 be collected during HD treatment. The majority who had fallen rarely reported them to  
49  
50 371 healthcare professionals, believing that they were an expected consequence of HD or having  
51  
52 372 had experience of their concerns about falls being overlooked. Consequently, falls prevention  
53  
54 373 was not viewed as a key outcome.  
55  
56  
57  
58  
59  
60



1  
2  
3  
4  
5  
6  
7  
8  
9  
10  
11  
12  
13  
14  
15  
16  
17  
18  
19  
20  
21  
22  
23  
24  
25  
26  
27  
28  
29  
30  
31  
32  
33  
34  
35  
36  
37  
38  
39  
40  
41  
42  
43  
44  
45  
46  
47  
48  
49  
50  
51  
52  
53  
54  
55  
56  
57  
58  
59  
60

374 *Table 5. Categories relating to outcome acceptability and illustrative quotes.*

For peer review only

1  
2  
3 375 *Perceptions of a tailored exercise programme*  
4

5  
6 376 *Delivery*  
7

8 377 There was no universally acceptable setting for exercise delivery (Table 6). Vulnerable and  
9  
10 378 mildly frail participants (CFS 4-5) were particularly open to group-based exercise in the  
11  
12 379 community or gym, which they felt would provide motivation through camaraderie with  
13  
14 380 others. However, access barriers due to HD treatment, complex health needs, and lack of  
15  
16 381 transport were common. Participants also described feeling self-conscious exercising  
17  
18 382 amongst 'normal' people. Home-based exercise was preferred by those with moderate to  
19  
20 383 severe frailty (CFS 6-7) due to easier access, greater flexibility and relevance to their daily  
21  
22 384 activities. Despite this, concerns about lack of space and safety were highlighted by those  
23  
24 385 who lived alone, whilst those with family were concerned about overburdening or injuring  
25  
26 386 them by asking for support.  
27  
28  
29  
30  
31  
32  
33  
34  
35  
36  
37  
38  
39  
40  
41  
42  
43  
44  
45  
46  
47  
48  
49  
50  
51  
52  
53  
54  
55  
56  
57  
58  
59  
60

1  
2  
3  
4  
5  
6  
7  
8  
9  
10  
11  
12  
13  
14  
15  
16  
17  
18  
19  
20  
21  
22  
23  
24  
25  
26  
27  
28  
29  
30  
31  
32  
33  
34  
35  
36  
37  
38  
39  
40  
41  
42  
43  
44  
45  
46

387 *Table 6. Participants perceptions of the facilitators and barriers to group and home-based exercise.*

For peer review only

1  
2  
3 388 *Characteristics of a tailored exercise programme*  
4

5 389 Irrespective of the setting for delivery, participants identified several key features of a  
6  
7 390 tailored exercise intervention which are summarised in Figure 2.  
8  
9

10 391

11  
12  
13 392 *Preparation*  
14

15  
16 393 Participants lived with a range of debilitating symptoms, most frequently fatigue, pain and  
17  
18 394 dyspnoea. Often daily activity alone was felt to be enough of a challenge. Common impacts  
19  
20 395 of exercise (for example breathlessness whilst exercising) were interpreted as worsening  
21  
22 396 symptoms or damage, and many participants were uncertain if exercise would be suitable or  
23  
24 397 beneficial. They indicated that the reason for exercising needed to be sufficiently compelling.  
25  
26 398 They wanted to know what to expect prior to exercising, and individualised goal setting was  
27  
28 399 advocated to build motivation and appreciate improvements.  
29

30 400

31  
32  
33 401 *Content*  
34  
35

36 402 Key components described were whole body resistance, aerobic and balance training. Many  
37  
38 403 participants described being unable to get up once they had fallen and felt that practising this  
39  
40 404 was also important. Routine physical activity was viewed as more purposeful than structured  
41  
42 405 exercise ‘for the sake of it’ and participants spoke of their enjoyment of being outside and  
43  
44 406 engaging in meaningful and physically active hobbies.  
45  
46  
47  
48  
49

50 407

51  
52  
53 408 *Structure*  
54

55 409 Supervision was viewed as essential to select, teach and progress exercises. Individual  
56  
57 410 tailoring which considered the impact of disability, comorbidities and fluctuating symptoms  
58  
59 411 was important, and a choice of exercises, for example swimming, dancing and yoga, was  
60

1  
2  
3 412 associated with increased enjoyment and engagement. Moderate to severely frail participants  
4  
5 413 wanted the programme to be progressed in a supportive and collaborative manner. Those who  
6  
7 414 were vulnerable or mildly frail wanted to be 'pushed' and progressed in a more assertive  
8  
9 415 manner.

10  
11  
12  
13 416

14  
15  
16 417 Having a companion (typically peers, family or friends) was viewed as helping to overcome  
17  
18 418 access barriers and provide socialisation and mutual motivation. The sharing of experience  
19  
20 419 was also seen as a powerful means of challenging preconceptions about exercise ability,  
21  
22 420 although participants with moderate to severe frailty raised concerns about feeling  
23  
24 421 embarrassed or 'judged' if they were less able.

25  
26  
27  
28 422

### 29 30 31 423 **Integrated mixed-methods analyses**

32  
33  
34 424 The integrated qualitative and quantitative findings suggest that an RCT of IDC is feasible for  
35  
36 425 frail HD patients following adaptation. However, IDC should not be the only intervention  
37  
38 426 offered and the development of a multicomponent programme is warranted (Supplementary  
39  
40 427 material 11).

41  
42  
43  
44 428

### 45 46 47 429 **DISCUSSION**

48  
49  
50 430 These results suggest that an RCT of IDC is feasible for frail HD patients with adaptation to  
51  
52 431 increase outcome acceptability and eligibility rates. Adherence to IDC was high and it was  
53  
54 432 viewed as a safe and efficient use of HD treatment time. Secondary outcomes also suggest  
55  
56 433 that, for HD patients with a CFS of 4-7, IDC may mitigate deterioration in exercise capacity,  
57  
58 434 endurance and functional muscle strength and increase PA behaviour (steps/day). Despite  
59  
60

1  
2  
3 435 this, participants described a preference for a multi-component programme that prepared  
4  
5 436 them for exercise, offered variety, companionship and individualised supervision. No single  
6  
7 437 preferred environment for the delivery of this intervention was identified but appeared to be  
8  
9 438 influenced by frailty grade and individual factors.  
10  
11  
12  
13 439  
14  
15  
16 440 27% to 89% of secondary outcome measure data were missing, and, overall, this progression  
17  
18 441 criterion was not achieved. Given that secondary measures are often insufficiently powered,  
19  
20 442 reducing the number collected within a future trial may improve completion<sup>27</sup>. Falls were not  
21  
22 443 of primary importance to participants, and aligns with the SONG-HD data which did not  
23  
24 444 identify falls as a key outcome<sup>29</sup>. Our findings suggest that accurately capturing prospective  
25  
26 445 falls data may be challenging due to under-reporting, and yet, retrospective falls data  
27  
28 446 collection does not fully reflect the incidence and impact of falls. Given the high incidence of  
29  
30 447 falls in this population, capturing falls data may be important in a future trial, and researcher-  
31  
32 448 led prospective data collection at the dialysis unit is recommended, in line with participant  
33  
34 449 feedback<sup>5</sup>. Further exploration and validation of meaningful measures for HD patients living  
35  
36 450 with frailty is also warranted. Some of the functional measures (the STS60 and ISWT)  
37  
38 451 included were too challenging and measures of independence, rarely used in exercise studies  
39  
40 452 to date, were highlighted as important within this study, and have also been included in  
41  
42 453 guidelines and core outcomes sets for HD and older people<sup>28-30</sup>.  
43  
44  
45  
46  
47  
48  
49 454

50  
51  
52 455 The results of this study indicate that changes to eligibility criteria and screening are required.  
53  
54 456 As only patient participants were interviewed, it was not possible to gain any insight on this  
55  
56 457 aspect of feasibility from the qualitative component. Importantly, the challenges of  
57  
58 458 identifying eligible participants do not appear to be unique to this study. Studies of older  
59  
60

1  
2  
3 459 people living with frailty highlight that large numbers need to be screened to achieve a 50%  
4  
5 460 recruitment rate, and a multicentre trial may be required<sup>27</sup>.  
6  
7

8 461  
9  
10  
11 462 This study suggests that IDC may reduce falls incidence in frail HD patients potentially by  
12  
13 463 attenuating a decline in exercise capacity, physical activity behaviour and function at levels  
14  
15 464 shown to be clinically meaningful in other long-term conditions<sup>31,32</sup>. This indicates that  
16  
17 465 preventing deterioration may be as valuable, and more attainable, as improving outcomes in a  
18  
19 466 frail population. Despite this, frail participants experienced difficulties achieving the  
20  
21 467 proposed level of exercise and maintaining motivation in the face of varying symptomology.  
22  
23 468 Exercise programmes have a dose-response, and these factors may have reduced participants  
24  
25 469 physical capability to exercise and achieve optimal benefit, despite the overall good level of  
26  
27 470 adherence. Clinical decision support tools have been used in other populations to rationalise  
28  
29 471 exercise prescription, progression and amendment in the presence of varying symptomology,  
30  
31 472 and a similar approach may be beneficial for frail HD patients<sup>33</sup>.  
32  
33  
34  
35  
36

37 473  
38  
39  
40 474 This study indicates that participants desire a multicomponent exercise programme, and  
41  
42 475 require an intervention that addresses their particularly low levels of PA. Whilst step count  
43  
44 476 and time spent in light and moderate PA increased following IDC, these were below PA  
45  
46 477 recommendations for older people<sup>34</sup>. To date, PA interventions for HD patients have  
47  
48 478 predominantly centred around walking, which may not be appropriate for those living with  
49  
50 479 frailty<sup>35-38</sup>. This study suggests that functional training (task-orientated exercises which  
51  
52 480 engages multiple muscle groups) and physical activity that focuses on 'doing more' of these  
53  
54 481 usual tasks may be more acceptable and efficacious. To date, two studies have employed  
55  
56 482 similar approaches with non-frail HD patients. One study demonstrated significant  
57  
58  
59  
60

1  
2  
3 483 improvements in lower extremity performance and the other a non-significant improvement  
4  
5 484 in physical function and maintenance of other SF-36 domains compared with the control  
6  
7  
8 485 group<sup>39,40</sup>. In older people without CKD who are living with frailty, functional training  
9  
10 486 included as part of a multicomponent exercise programme is beneficial across a range of  
11  
12 487 outcomes, including greater ability to rise from the floor following a fall <sup>38,41-44</sup>. A similar  
13  
14 488 approach to exercise prescription may be warranted in a frail HD population.

15  
16  
17 489  
18  
19  
20 490 Numerous barriers and facilitators to exercise were identified within this study, which have  
21  
22 491 implications for the design of a programme. The use of theory is crucial in the development  
23  
24 492 of effective interventions and the behaviour change wheel (BCW) is most frequently cited in  
25  
26 493 the development of interventions in CKD<sup>45</sup>. Mapping the identified barriers and facilitators to  
27  
28 494 the BCW indicates that ameliorating symptom burden prior to exercise, individualised  
29  
30 495 exercise counselling, and a collaborative, problem-solving approach to exercise education are  
31  
32 496 most likely to encourage and sustain participation<sup>45,46</sup>. Devising ways in which peer and  
33  
34 497 family involvement can be incorporated into the programme may also increase motivation  
35  
36 498 and opportunity to exercise but should be carefully managed given the potential for negative  
37  
38 499 comparison amongst the frailest patients.

39  
40  
41 500  
42  
43  
44 501 A lack of preferred environment for intervention delivery may have implications for a  
45  
46 502 definitive RCT. Exercise interventions require motivation, and limited engagement may  
47  
48 503 negatively influence a trials external and internal validity. Ignoring patient preference is also  
49  
50 504 out of step with clinical practice, where rehabilitation involves shared decision-making.  
51  
52 505 Taken together, these factors have implications for determining treatment effects and future  
53  
54 506 intervention implementation<sup>47</sup>. There is increasing recognition that novel trial designs may be



1  
2  
3 507 indicated when evaluating complex interventions and a Partially Randomised Patient  
4  
5 508 Preference Trial, where participants without preference are randomised whilst those with a  
6  
7 509 preference receive their choice, would provide information on both the efficacy of the  
8  
9 510 intervention and the influence of preference<sup>47,48</sup>.

11  
12  
13 511

### 16 512 **Strengths and limitations**

17  
18  
19 513 To our knowledge, this study is the first to examine the feasibility of an RCT of IDC for frail  
20  
21 514 HD patients and to explore how trial procedures and exercise programmes should be  
22  
23 515 specifically tailored to the needs of this group, from their own perspectives.

24  
25  
26 516 Key strengths were the use of a validated frailty risk-stratification measure and multiple  
27  
28 517 qualitative methods which provided a form of triangulation<sup>49</sup>. There were, however,  
29  
30 518 challenges to recruiting severely frail participants to both the trial and the qualitative arms.  
31  
32 519 Additionally, the views of clinicians and researchers were not explored. A future RCT should  
33  
34 520 also blind outcome assessors to group allocation to reduce the potential for detection bias.  
35  
36 521

37  
38  
39 521

### 41 522 **Conclusion**

42  
43  
44 523 In summary, this study suggests that a future definitive trial of IDC is feasible within a HD  
45  
46 524 population with a CFS of 4-7 and paying particular attention in the design to those factors  
47  
48 525 mentioned above may facilitate improved rates of eligibility and outcome completion.  
49  
50 526 Outcomes focusing on independence and participation should be the primary outcomes of  
51  
52 527 interest in a future trial. Whilst an exploratory analysis suggests some potential benefits to  
53  
54 528 IDC, a tailored intervention comprising a comprehensive multi-component programme,  
55  
56  
57  
58  
59  
60

1  
2  
3 529 symptom management, education and behaviour change is better suited to frail HD patients'  
4  
5 530 needs.  
6  
7

8 531  
9

10  
11 532 **ACKNOWLEDGEMENTS**  
12

13  
14 533 The authors would like to thank the staff and patients at all units, Fresenius Medical Care and  
15  
16 534 The Leicester Kidney Care Appeal. The authors also wish to thank Freya Tyrer for sharing her  
17  
18 535 statistical expertise.  
19  
20

21 536  
22  
23

24 537 **COMPETING INTERESTS**  
25

26  
27 538 The authors have no conflicts of interest to declare.  
28  
29

30 539  
31  
32

33 540 **FUNDING**  
34

35  
36 541 The work was funded by the National Institute for Health Research (NIHR) Leicester  
37  
38 542 Biomedical Research Centre, Collaboration for Leadership in Applied Health Research and  
39  
40 543 Care East Midlands (CLAHRC EM) and partly funded by the Stonegate Trust. H.M.L.Y.  
41  
42 544 and J.O.B. are supported by grants from the NIHR (DRF-2016-09-015 and CS-2013-13-014).  
43  
44 545 S.J.S. is supported by the Collaboration for Leadership in Applied Health Research and Care  
45  
46 546 East Midlands. The views expressed in this publication are those of the authors and not  
47  
48 547 necessarily those of the NHS, the NIHR or the Department of Health and Social Care. The  
49  
50 548 funders had no role in the study design; collection, analysis, and interpretation of the data;  
51  
52  
53  
54

55 549  
56

57 550 **AUTHORS CONTRIBUTIONS**  
58  
59  
60

1  
2  
3 551 Literature search: HMLY; Research idea and study design: HMLY, JOB; participant  
4  
5 552 recruitment: HMLY, DS, PH, DC, MPMGB, JOB, CG; data acquisition: HMLY, DS,PH,DC,  
6  
7 553 MPMGB,CG WJ, MC; clinical governance: JOB; data analysis: HMLY, SG; statistical  
8  
9 554 analysis: HMLY; supervision and mentorship: SC, HE, SG, SJS, ACS, JOB; manuscript  
10  
11 555 preparation: HMLY; reviewed final manuscript: all. Each author contributed important  
12  
13 556 intellectual content during manuscript drafting or revision and accepts accountability for the  
14  
15 557 overall work by ensuring that questions pertaining to the accuracy or integrity of any portion  
16  
17 558 of the work are appropriately investigated and resolved. All authors have read and approved  
18  
19 559 the final version  
20  
21  
22  
23  
24  
25  
26  
27  
28  
29

### 30 561 **ETHICAL APPROVAL**

31 562 This study was approved by the East Midlands (Northampton; REC ref: 14/EM/1190) and  
32  
33 563 South West (Bristol; REC ref: 17/SW/0048) NHS Research Ethics Committees for the trial  
34  
35 564 and the qualitative component respectively  
36  
37  
38  
39  
40

### 41 566 **DATA SHARING STATEMENT**

42  
43  
44 567 The datasets used and analysed during the current study are available from the corresponding  
45  
46 568 author on reasonable request.  
47  
48  
49  
50  
51  
52  
53  
54  
55  
56  
57  
58  
59  
60

1  
2  
3 569 **REFERENCES**  
4  
5

- 6 570 1. Clegg A, Young J, Iliffe S, et al Frailty in elderly people. *The Lancet*.  
7  
8 571 2013;381(9868):752-762.  
9  
10  
11  
12 572 2. Zhao Y, Liu Q, Ji J. The prevalence of frailty in patients on hemodialysis: A systematic  
13  
14 573 review and meta-analysis. *Int Urol Nephrol*. 2019:1-6.  
15  
16  
17  
18 574 3. Iyasere OU, Brown EA, Johansson L, et al. Quality of life and physical function in older  
19  
20 575 patients on dialysis: A comparison of assisted peritoneal dialysis with hemodialysis. *Clin J*  
21  
22 576 *Am Soc Nephrol*. 2016;11(3):423-430.  
23  
24  
25  
26 577 4. Johansen KL, Chertow GM, Jin C, et al. Significance of frailty among dialysis patients.  
27  
28 578 *Journal of the American Society of Nephrology*. 2007;18(11):2960-2967.  
29  
30  
31  
32 579 5. López-Soto PJ, De Giorgi A, Senno E, et al. Renal disease and accidental falls: A review  
33  
34 580 of published evidence. *BMC nephrology*. 2015;16(1):176.  
35  
36  
37  
38 581 6. Johansen KL, Dalrymple LS, Delgado C, et al. Factors associated with frailty and its  
39  
40 582 trajectory among patients on hemodialysis. *Clinical Journal of the American Society of*  
41  
42 583 *Nephrology*. 2017;12(7):1100-1108.  
43  
44  
45  
46 584 7. Wang CJ, Johansen KL. Are dialysis patients too frail to exercise? Seminars in  
47  
48 585 dialysis.2019;32(4) 1-6.  
49  
50  
51  
52 586 8. Young HML, March DS, Graham-Brown MP, et al. Effects of intradialytic cycling  
53  
54 587 exercise on exercise capacity, quality of life, physical function and cardiovascular measures  
55  
56 588 in adult haemodialysis patients: A systematic review and meta-analysis. *Nephrology Dialysis*  
57  
58 589 *Transplantation*. 2018; 33(8),1436-1445.  
60

- 1  
2  
3 590 9. Brown EA. Can quality of life be improved for the increasing numbers of older patients  
4  
5 591 with end-stage kidney disease? *Expert review of pharmacoeconomics & outcomes research*.  
6  
7 592 2010;10(6):661-666.  
8  
9  
10  
11 593 10. Farrington K, Covic A, Nistor I, et al. Clinical practice guideline on management of older  
12  
13 594 patients with chronic kidney disease stage 3b or higher (eGFR < 45 mL/min/1.73 m<sup>2</sup>): A  
14  
15 595 summary document from the European renal best practice group. *Nephrology Dialysis*  
16  
17 596 *Transplantation*. 2017;32(1):9-16.  
18  
19  
20  
21 597 11. Graham-Brown M, March DS, Churchward DR, et al. Design and methods of CYCLE-  
22  
23 598 HD: Improving cardiovascular health in patients with end stage renal disease using a  
24  
25 599 structured programme of exercise: A randomised control trial. *BMC nephrology*.  
26  
27 600 2016;17(1):69.  
28  
29  
30  
31  
32 601 12. Charmaz K. Constructing grounded theory (introducing qualitative methods series). 2nd  
33  
34 602 edn. London: Sage Publications 2014.  
35  
36  
37  
38 603 13. Nixon AC, Bampouras TM, Pendleton N, et al. Diagnostic accuracy of frailty screening  
39  
40 604 methods in advanced chronic kidney disease. *Nephron*. 2019;141(3):147-155.  
41  
42  
43  
44 605 14. Hoffmann TC, Glasziou PP, Boutron I, et al. Better reporting of interventions: Template  
45  
46 606 for intervention description and replication (TIDieR) checklist and guide. *BMJ*.  
47  
48 607 2014;348:g1687.  
49  
50  
51  
52 608 15. Borg GA. Psychophysical bases of perceived exertion. *Med Sci Sports Exerc*.  
53  
54 609 1982;14(5):377-381.  
55  
56  
57  
58 610 16. Sim J, Lewis M. The size of a pilot study for a clinical trial should be calculated in  
59  
611 611 relation to considerations of precision and efficiency. *J Clin Epidemiol*. 2012;65(3):301-308.

- 1  
2  
3 612 17. Young HM, Goodliffe S, Madhani M, et al. Co-producing progression criteria for  
4  
5 613 feasibility studies: A partnership between patient contributors, clinicians and researchers.  
6  
7 614 *International journal of environmental research and public health*. 2019;16(19):3756.  
8  
9  
10  
11 615 18. Avery KN, Williamson PR, Gamble C, et al. Informing efficient randomised controlled  
12  
13 616 trials: Exploration of challenges in developing progression criteria for internal pilot studies.  
14  
15 617 *BMJ open*. 2017;7(2):e013537.  
16  
17  
18  
19 618 19. Beddhu S, Bruns FJ, Saul M, et al. A simple comorbidity scale predicts clinical outcomes  
20  
21 619 and costs in dialysis patients. *Am J Med*. 2000;108(8):609-613.  
22  
23  
24  
25 620 20. Lamb SE, Jørstad-Stein EC, Hauer K, et al. Development of a common outcome data set  
26  
27 621 for fall injury prevention trials: The prevention of falls network europe consensus. *J Am*  
28  
29 622 *Geriatr Soc*. 2005;53(9):1618-1622.  
30  
31  
32  
33 623 21. Young HML, Orme MW, Song Y, et al. Standardising the measurement of physical  
34  
35 624 activity in people receiving haemodialysis: Considerations for research and practice. *BMC*  
36  
37 625 *nephrology*. 2019;20(1):450.  
38  
39  
40  
41 626 22. Eldridge SM, Chan CL, Campbell MJ, et al. CONSORT 2010 statement: Extension to  
42  
43 627 randomised pilot and feasibility trials. *Pilot and feasibility studies*. 2016;2(1):64.  
44  
45  
46  
47 628 23. Richards DA, Bazeley P, Borglin G, et al. Integrating quantitative and qualitative data  
48  
49 629 and findings when undertaking randomised controlled trials. *BMJ open*. 2019;9(11).  
50  
51  
52  
53 630 24. Witham MD, Stott DJ. Conducting and reporting trials for older people. *Age Ageing*.  
54  
55 631 2017;46(6):889-894.  
56  
57  
58  
59  
60

- 1  
2  
3 632 25. SONG initiative. Standardised outcomes in nephrology - haemodialysis.  
4  
5 633 <http://songinitiative.org/projects/song-hd/>. Updated 2017. Accessed July, 2019.  
6  
7  
8  
9 634 26. Akpan A, Roberts C, Bandeen-Roche K, et al. Standard set of health outcome measures  
10  
11 635 for older persons. *BMC geriatrics*. 2018;18(1):36.  
12  
13  
14  
15 636 27. Matsufuji S, Shoji T, Yano Y, et al. Effect of chair stand exercise on activity of daily  
16  
17 637 living: A randomized controlled trial in hemodialysis patients. *Journal of Renal Nutrition*.  
18  
19 638 2015;25(1):17-24.  
20  
21  
22  
23 639 28. Yates T, Gray LJ, Henson J, et al. Impact of depression and anxiety on change to physical  
24  
25 640 activity following a pragmatic diabetes prevention program within primary care: Pooled  
26  
27 641 analysis from two randomized controlled trials. *Diabetes Care*. 2019;42(10):1847-1853.  
28  
29  
30  
31 642 29. Zatloukal J, Houchen-Wolloff L, Ward S, et al. Clinical significance for ESWT in COPD  
32  
33 643 after a course of pulmonary rehabilitation. *Chro Respiratory*  
34  
35 644 *Disease*.2015;46.1479973119853828  
36  
37  
38  
39 645 30. Carvalho LP, Kergoat M, Bolduc A, et al. A systematic approach for prescribing  
40  
41 646 posthospitalization home-based physical activity for mobility in older adults: The PATH  
42  
43 647 study. *Journal of the American Medical Directors Association*. 2019;20(10):1287-1293.  
44  
45  
46  
47 648 31. Department of Health. Physical activity guidelines for older adults.  
48  
49 649 <https://www.nhs.uk/live-well/exercise/physical-activity-guidelines-older-adults/>. Updated  
50  
51 650 2019. Accessed April, 2020.  
52  
53  
54  
55 651 32. Baggetta R, D'Arrigo G, Torino C, et al. Effect of a home based, low intensity, physical  
56  
57 652 exercise program in older adults dialysis patients: A secondary analysis of the EXCITE trial.  
58  
59 653 *BMC geriatrics*. 2018;18(1):248.

- 1  
2  
3 654 33. Bohm C, Stewart K, Onyskie-Marcus J, Esliger D, et al. Effects of intradialytic cycling  
4  
5 655 compared with pedometry on physical function in chronic outpatient hemodialysis: A  
6  
7 656 prospective randomized trial. *Nephrology Dialysis Transplantation*. 2014;29(10):1947-1955.  
8  
9  
10  
11 657 34. Sheshadri A, Kittiskulnam P, Lazar AA, et al. A walking intervention to increase weekly  
12  
13 658 steps in dialysis patients: A pilot randomized controlled trial. *American Journal of Kidney*  
14  
15 659 *Diseases*. 2020; 75(4):488-496  
16  
17  
18  
19 660 35. de Labra C, Guimaraes-Pinheiro C, Maseda A, et al. Effects of physical exercise  
20  
21 661 interventions in frail older adults: A systematic review of randomized controlled trials. *BMC*  
22  
23 662 *geriatrics*. 2015;15(1):1.  
24  
25  
26  
27 663 36. Tawney KW, Tawney PJ, Hladik G, et al. The life readiness program: A physical  
28  
29 664 rehabilitation program for patients on hemodialysis. *American journal of kidney diseases*.  
30  
31 665 2000;36(3):581-591.  
32  
33  
34  
35 666 37. Bogataj Š, Pajek J, Ponikvar JB, et al. Kinesiologist-guided functional exercise in  
36  
37 667 addition to intradialytic cycling program in end-stage kidney disease patients: A randomised  
38  
39 668 controlled trial. *Scientific reports*. 2020;10(1):1-10.  
40  
41  
42  
43 669 38. Hofmeyer MR, Alexander NB, Nyquist LV, et al. Floor-Rise strategy training in older  
44  
45 670 adults. *J Am Geriatr Soc*. 2002;50(10):1702-1706.  
46  
47  
48  
49 671 39. Skelton DA, McLaughlin AW. Training functional ability in old age. *Physiotherapy*.  
50  
51 672 1996;82(3):159-167.  
52  
53  
54  
55 673 40. Giné-Garriga M, Roqué-Fíguls M, Coll-Planas L, et al. Physical exercise interventions for  
56  
57 674 improving performance-based measures of physical function in community-dwelling, frail  
58  
59  
60



- 1  
2  
3 675 older adults: A systematic review and meta-analysis. *Arch Phys Med Rehabil.*  
4  
5 676 2014;95(4):753-769. e3.  
6  
7  
8  
9 677 41. Liu C, Shiroy DM, Jones LY, et al. Systematic review of functional training on muscle  
10  
11 678 strength, physical functioning, and activities of daily living in older adults. *European review*  
12  
13 679 *of aging and physical activity.* 2014;11(2):95.  
14  
15  
16  
17 680 42. Clarke AL Jhamb M, Bennett P. Barriers and facilitators for engagement and  
18  
19 681 implementation of exercise in end-stage kidney disease: Future theory-based interventions  
20  
21 682 using the behavior change wheel. *Seminars in Dialysis.* 2019:1-12.  
22  
23  
24  
25 683 43. Michie S, Atkins L, West R. The behaviour change wheel. *A guide to designing*  
26  
27 684 *interventions. 1st ed. Great Britain: Silverback Publishing.* 2014:1003-1010.  
28  
29  
30  
31 685 44. Wasmann KA, Wijnsman P, van Dieren S, et al. Partially randomised patient preference  
32  
33 686 trials as an alternative design to randomised controlled trials: Systematic review and meta-  
34  
35 687 analyses. *BMJ open.* 2019;9(10):e031151.  
36  
37  
38  
39 688 45. Craig P, Dieppe P, Macintyre S, et al. Developing and evaluating complex interventions:  
40  
41 689 The new medical research council guidance. *BMJ.* 2008;337:a1655.  
42  
43  
44  
45 690 46. Tracy SJ. Qualitative quality: Eight “big-tent” criteria for excellent qualitative research.  
46  
47 691 *Qualitative inquiry.* 2010;16(10):837-851.  
48  
49  
50  
51 692

## 53 693 **LEGENDS TO FIGURES**

54  
55  
56 694 Figure 1.CONSORT  
57  
58  
59  
60

1  
2  
3 695 Figure 2. The core components of an acceptable exercise programme for people living with  
4  
5 696 frailty and receiving haemodialysis.  
6  
7

8 697  
9

10  
11 698 **SUPPLEMENTARY MATERIAL**  
12

13  
14 699 Supplementary material 1. Inclusion and exclusion criteria for the CYCLE-HD trial  
15  
16

17 700 Supplementary material 2. Summary of intervention characteristics, in line with TiDier  
18  
19 701 guidance.  
20  
21

22 702 Supplementary material 3. *A priori* progression criteria based on the primary feasibility  
23  
24 703 objectives.  
25  
26

27  
28 704 Supplementary material 4. Patient-reported secondary outcome measures.  
29  
30

31 705 Supplementary material 5. Interview topic guide questions.  
32  
33

34 706 Supplementary material 6. Incidence of falls per person-year.  
35  
36

37 707 Supplementary material 7. Changes in exercise capacity and physical function after six  
38  
39 708 months.  
40  
41

42 709 Supplementary material 8. Changes in physical activity (accelerometry data) after six months.  
43  
44

45 710 Supplementary material 9. Patient-reported outcomes measures after six months.  
46  
47

48 711 Supplementary material 10. Baseline demographic and clinical characteristics for the  
49  
50 712 qualitative participants.  
51  
52

53 713 Supplementary material 11. Joint display of quantitative and qualitative results, with an  
54  
55 714 overall assessment of mixed-methods inferences.  
56  
57  
58  
59  
60

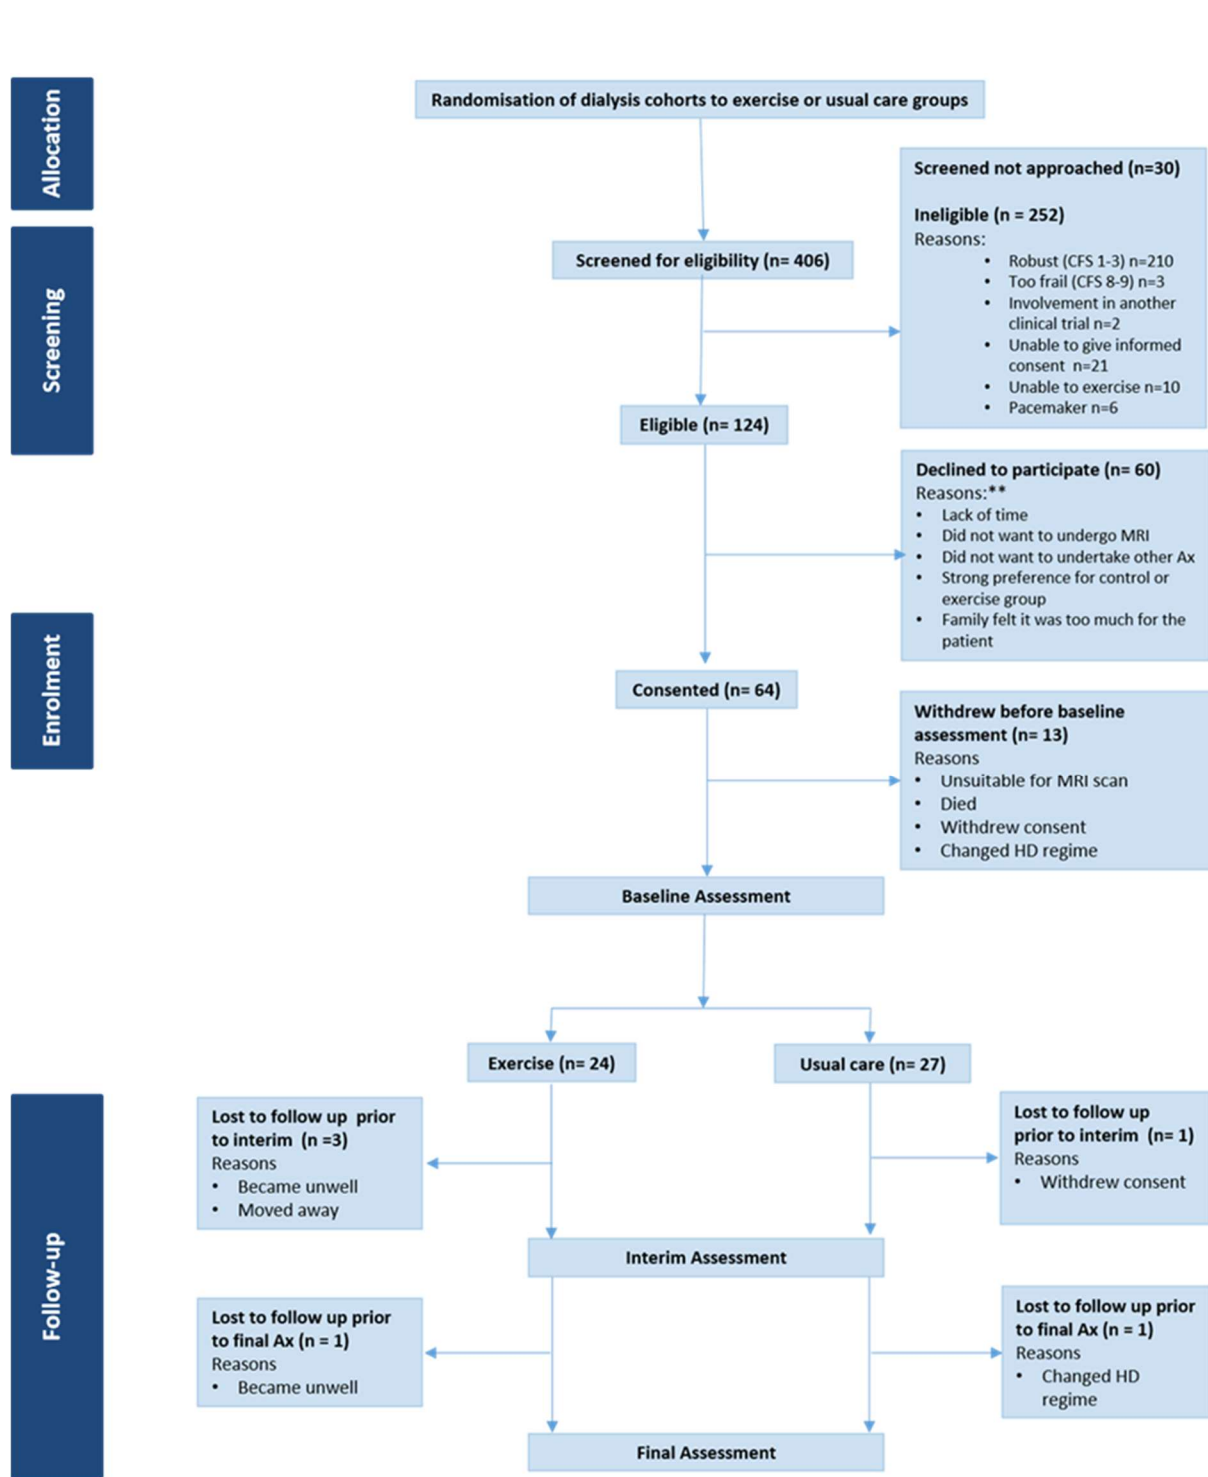

Abbreviations: Ax, assessment; CFS, Clinical Frailty Scale; HD, haemodialysis.

Supplementary material 1. Inclusion and exclusion criteria for the *CYCLE-HD* trial.

| Inclusion criteria                        | Exclusion criteria                                                                                      |
|-------------------------------------------|---------------------------------------------------------------------------------------------------------|
| Prevalent HD patient (> three months)     | Unable to participate in current exercise programme due to perceived physical or psychological barriers |
| Aged 18 years or older                    | Unable to undergo MRI scanning (metal implants, severe claustrophobia)                                  |
| Able and willing to give informed consent | Unfit to undertake exercise according to the American College of Sports Medicine (ACSM) guidelines      |

Supplementary material 2. Summary of intervention characteristics, in line with TiDier guidance.

|                                      |                                                                              |                                                                                                                                                                                                                                                                                                                                                                                                                                                           |
|--------------------------------------|------------------------------------------------------------------------------|-----------------------------------------------------------------------------------------------------------------------------------------------------------------------------------------------------------------------------------------------------------------------------------------------------------------------------------------------------------------------------------------------------------------------------------------------------------|
| <b>Description of intervention.</b>  |                                                                              | A structured, supervised cycling exercise intervention delivered during in-centre HD.                                                                                                                                                                                                                                                                                                                                                                     |
| <b>Rationale.</b>                    |                                                                              | <ul style="list-style-type: none"> <li>• IDC aerobic and low-level resistance training, IDC is associated with increased adherence and is most widely used within practice.</li> </ul>                                                                                                                                                                                                                                                                    |
| <b>What.</b>                         | Materials provided to participants or used to support intervention delivery. | <ul style="list-style-type: none"> <li>• Cycling was delivered using the Moto Med Letto 2 (Medimotion Ltd).</li> <li>• Materials: individualised exercise prescription and records of individual training bouts (duration (mins), intensity (RPE), resistance (gear), power output (watts) and energy expenditure (Kcal).</li> <li>• General information on the benefits of exercise (posters and leaflets) available across all 3 HD centres.</li> </ul> |
|                                      | Materials used to train intervention providers.                              | Standardised progression and training protocol used by all providers.                                                                                                                                                                                                                                                                                                                                                                                     |
| <b>Who</b> (intervention providers). |                                                                              | <ul style="list-style-type: none"> <li>• Qualified exercise professionals with experience of delivering exercise to renal patients.</li> <li>• All providers were directly involved in the study, and not delivering the sessions as part of a clinical role.</li> <li>• Roles included exercise provision, supervision, monitoring and progression.</li> </ul>                                                                                           |
| <b>How</b> (mode of delivery).       |                                                                              | One to one, face to face.                                                                                                                                                                                                                                                                                                                                                                                                                                 |
| <b>Where</b> (location).             |                                                                              | Three HD units across the East Midlands, UK.                                                                                                                                                                                                                                                                                                                                                                                                              |
| <b>When and how much</b>             | The frequency of delivery.                                                   | Thrice weekly during each dialysis session.                                                                                                                                                                                                                                                                                                                                                                                                               |
|                                      | Target intensity of each bout of exercise.                                   | RPE 12-14 (moderate intensity), cadence 60-70 RPM.                                                                                                                                                                                                                                                                                                                                                                                                        |
|                                      | Target duration of each bout of exercise.                                    | At least 30 minutes of continuous exercise.                                                                                                                                                                                                                                                                                                                                                                                                               |
|                                      | The total duration of delivery.                                              | Six months, with a one-month run-in period to achieve the target exercise prescription.                                                                                                                                                                                                                                                                                                                                                                   |
| <b>Tailoring.</b>                    |                                                                              | <ul style="list-style-type: none"> <li>• The starting resistance (gear) based on the individual's tolerance.</li> <li>• RPE used throughout to monitor and progress the exercise.</li> <li>• Interval training was permitted.</li> </ul>                                                                                                                                                                                                                  |

Abbreviations: HD, haemodialysis; Kcals, kilocalories; RPE, rating of perceived exertion, RPM, revolutions per minute.

Supplementary material 3. A priori progression criteria based on the primary feasibility objectives.

|                               |             |                                                         |
|-------------------------------|-------------|---------------------------------------------------------|
| <b>Eligibility</b>            | <b>Stop</b> | Less than <b>20%</b> of all patients eligible           |
|                               | <b>Go</b>   | More than <b>50%</b> of all patients eligible           |
| <b>Recruitment</b>            | <b>Stop</b> | Less than <b>25%</b> of eligible patients recruited     |
|                               | <b>Go</b>   | More than <b>50%</b> of eligible patients recruited     |
| <b>Exercise acceptability</b> | <b>Stop</b> | Less than <b>30%</b> adherence to the exercise sessions |
|                               | <b>Go</b>   | More than <b>70%</b> adherence to the exercise sessions |
| <b>Outcome acceptability</b>  | <b>Stop</b> | Less than <b>70%</b> outcome measure completion         |
|                               | <b>Go</b>   | More than <b>80%</b> outcome measure completion         |
| <b>Loss to follow-up</b>      | <b>Stop</b> | More than <b>40%</b> loss to follow-up                  |
|                               | <b>Go</b>   | Less than <b>20%</b> loss to follow-up                  |

Supplementary material 4. Patient-reported secondary outcome measures.

| <b>Patient-reported secondary outcome</b>                                 | <b>Construct measured</b>                                                                                                                                                                                                                                                     |
|---------------------------------------------------------------------------|-------------------------------------------------------------------------------------------------------------------------------------------------------------------------------------------------------------------------------------------------------------------------------|
| 12-item Short-Form Health Survey Version 2 (SF-12)                        | Generic health-related quality of life. Higher scores reflect better HRQoL. Scores are presented as a mental and physical component summary score.                                                                                                                            |
| Palliative care Outcomes Scale – Renal version (POS-R)                    | Renal specific measure of symptomology and symptom burden. A global symptom score was calculated by totalling all the scored items within the questionnaire. The mean number of symptoms, symptom severity was also calculated. Higher scores reflect greater symptom burden. |
| Hospital Anxiety and Depression Scale (HADS)                              | Emotional distress. A score of $\geq 14$ indicates the presence of emotional distress in HD patients                                                                                                                                                                          |
| The Exercise Self-Efficacy Scale (ESES)                                   | Exercise confidence. Higher scores reflecting greater self-efficacy.                                                                                                                                                                                                          |
| Dialysis Patient-Perceived Exercise Benefits and Barriers Scale (DPPEBBS) | HD patients' perceptions of benefits and barriers to exercise. Higher scores indicate a greater perception of the benefits of exercise over barriers.                                                                                                                         |
| The Dukes Activity Status Index (DASI)                                    | Self-reported physical function. Higher scores indicate higher levels of physical function. The questionnaire was also used to estimate $VO_2$ peak.                                                                                                                          |

1  
2  
3 *Supplementary material 5. Interview topic guide question.*  
4

5 Diary  
6  
7  
8

- 9 1. Can you tell me about how you have been using the diary?  
10  
11 2. If we asked patients to keep diaries like yours as part of a future study, what might help  
12 them?  
13  
14 3. [If applicable] I've had an opportunity to have a look through your diary. Could you tell  
15 me more about...?  
16

17  
18  
19 Exercise intervention for frailty and falls  
20

- 21  
22  
23 4. For some people exercising helps to prevent falls, make people more able and feel better.  
24 How do you feel about exercising?  
25  
26 5. Cycling during dialysis is thought to be a good way to exercise if you are on dialysis. Have  
27 you seen these bikes?  
28  
29 6. Programmes that are available for other people who fall include things like group exercise  
30 and education. What do you think about this?  
31  
32 7. These programmes usually take place at the hospital. What do you think about this?  
33  
34 8. Some people prefer to do their exercise at home. What do you think about this?  
35  
36 9. Where do you think a programme should be run?  
37  
38 10. How often do you think you would be able to exercise?  
39  
40 11. Would you want any support to help you exercise?  
41  
42 12. What might put you off exercising?  
43  
44 13. What questions might you have before you decide to take part or not?  
45  
46 14. If you did take part in some kind of exercise programme, what improvements would you  
47 most like to see?  
48  
49

50  
51 Research  
52

- 53 15. Have you ever been involved in research before? [Could tailor to involvement in CYCLE  
54 study (declined/ took part. If took part completed/dropped out) if patient unsure]  
55  
56 16. What do you think about the information you receive when deciding to take part in a  
57 research study?  
58  
59  
60



1  
2  
3 17. Often researchers ask you to complete some assessments or tests to see if the thing they  
4 are studying is effective or not. What do you think would help patients to complete these  
5 assessments/ tests?  
6

7  
8 18. Sometimes people don't complete the research study, which may happen for several  
9 reasons [give examples as needed]. What do you think would help keep dialysis from  
10 dropping out of research studies?  
11

12 19. What would you like to happen once you reach the end of the study?  
13  
14  
15  
16  
17  
18  
19  
20  
21  
22  
23  
24  
25  
26  
27  
28  
29  
30  
31  
32  
33  
34  
35  
36  
37  
38  
39  
40  
41  
42  
43  
44  
45  
46  
47  
48  
49  
50  
51  
52  
53  
54  
55  
56  
57  
58  
59  
60

For peer review only

1  
2  
3 *Supplementary material 6. Incidence of falls per patient-year.*  
4

|                       | <b>Exercise</b> | <b>Usual care</b> |
|-----------------------|-----------------|-------------------|
| <b>Falls</b>          | 5               | 11                |
| <b>Patient-year</b>   | 36              | 40.5              |
| <b>Incidence rate</b> | 0.14            | 0.27              |

5  
6  
7  
8  
9  
10  
11  
12  
13  
14  
15  
16  
17  
18  
19  
20  
21  
22  
23  
24  
25  
26  
27  
28  
29  
30  
31  
32  
33  
34  
35  
36  
37  
38  
39  
40  
41  
42  
43  
44  
45  
46  
47  
48  
49  
50  
51  
52  
53  
54  
55  
56  
57  
58  
59  
60

Supplementary material 7. Changes in exercise capacity and physical function after six months.

|             | Outcome             |          | Usual Care  | Exercise     | Difference (95% CI)  |
|-------------|---------------------|----------|-------------|--------------|----------------------|
| ISWT (m)    | n                   |          | 16          | 15           | 36 (-12 to 84)       |
|             | Baseline            |          | 184 ± 130   | 237 ± 173    |                      |
|             | Final               |          | 158 ± 154   | 248 ± 192    |                      |
|             | Change              |          | -26 ± 68    | 11 ± 63      |                      |
| ESWT (secs) | n                   |          | 14          | 15           | 181 (-92 to 453)     |
|             | Baseline            |          | 347 ± 384   | 401 ± 375    |                      |
|             | Final               |          | 193 ± 304   | 428 ± 423    |                      |
|             | Change              |          | -153 ± 286  | 27 ± 413     |                      |
| STS60 (n)   | n                   |          | 17          | 15           | 0 (-5 to 4)          |
|             | Baseline            |          | 10 ± 12     | 13 ± 11      |                      |
|             | Final               |          | 10 ± 13     | 13 ± 12      |                      |
|             | Change              |          | 0 ± 7       | 0 ± 6        |                      |
| SPPB        | Total score         | n        | 17          | 15           | 0.5 (-0.7 to 2)      |
|             |                     | Baseline | 7 ± 3       | 9 ± 3        |                      |
|             |                     | Final    | 6 ± 2       | 8 ± 3        |                      |
|             |                     | Change   | -1 ± 2      | -0.5 ± 1     |                      |
|             | 4m walk time (secs) | n        | 17          | 15           | 1 (-1 to 4)          |
|             |                     | Baseline | 7 ± 6       | 4 ± 1        |                      |
|             |                     | Final    | 6 ± 4       | 5 ± 2        |                      |
|             |                     | Change   | 1 ± 5       | 0 ± 1        |                      |
|             | Gait speed (m/s)    | n        | 17          | 15           | 0.05 (-0.12 to 0.22) |
|             |                     | Baseline | 0.74 ± 0.29 | 0.96 ± 0.28  |                      |
|             |                     | Final    | 0.74 ± 0.28 | 0.91 ± 0.31  |                      |
|             |                     | Change   | 0.00 ± 0.22 | -0.05 ± 0.24 |                      |
|             | STS5 (secs)         | n        | 9           | 10           | 5 (-4 to 15)         |
|             |                     | Baseline | 17 ± 7      | 16 ± 14      |                      |
|             |                     | Final    | 23 ± 13     | 16 ± 10      |                      |
|             |                     | Change   | 6 ± 11      | 0 ± 8        |                      |

Abbreviations: CI, confidence interval; ESWT, Endurance Shuttle Walk Test; ISWT, Incremental Shuttle Walk Test; m/s, metres per second; Secs, seconds; SPPB, Short Physical Performance Battery; STS5, Sit to Stand Five Repetitions; STS60, Sit to Stand in Sixty Seconds.

Supplementary material 8. Changes in physical activity (accelerometry data) after six months.

|                         | Type of day |          | Usual Care  | Exercise    | Difference (95% CI) |
|-------------------------|-------------|----------|-------------|-------------|---------------------|
| Waking wear time (mins) | HD          | n        | 5           | 10          | 244 (16 to 473)     |
|                         |             | Baseline | 891 ± 202   | 818 ± 183   |                     |
|                         |             | Final    | 749 ± 105   | 921 ± 171   |                     |
|                         |             | Change   | -142 ± 166  | 103 ± 204   |                     |
|                         | Non-HD      | n        | 5           | 10          | 170 (-13 to 353)    |
|                         |             | Baseline | 893 ± 90    | 927 ± 216   |                     |
|                         |             | Final    | 817 ± 134   | 1022 ± 165  |                     |
|                         |             | Change   | -75 ± 201   | 95 ± 129    |                     |
| Steps (steps/day)       | HD          | n        | 5           | 10          | 859 (-825 to 2543)  |
|                         |             | Baseline | 2252 ± 4210 | 1373 ± 1080 |                     |
|                         |             | Final    | 2464 ± 4783 | 2444 ± 1904 |                     |
|                         |             | Change   | 211 ± 593   | 1070 ± 1665 |                     |
|                         | Non-HD      | n        | 5           | 10          | 888 (-84 to 1861)   |
|                         |             | Baseline | 3076 ± 5790 | 2387 ± 1696 |                     |
|                         |             | Final    | 2645 ± 5284 | 2845 ± 2117 |                     |
|                         |             | Change   | -430 ± 603  | 458 ± 903   |                     |
| Sedentary (mins/day)    | HD          | n        | 5           | 10          | 28 (-284 to 340)    |
|                         |             | Baseline | 954 ± 338   | 954 ± 203   |                     |
|                         |             | Final    | 965 ± 208   | 992 ± 182   |                     |
|                         |             | Change   | 10 ± 200    | 38 ± 287    |                     |
|                         | Non-HD      | n        | 5           | 10          | 124 (-205 to 454)   |
|                         |             | Baseline | 1022 ± 357  | 1103 ± 253  |                     |
|                         |             | Final    | 912 ± 224   | 1117 ± 174  |                     |
|                         |             | Change   | -110 ± 298  | 14 ± 269    |                     |
| Light PA (mins/day)     | HD          | n        | 5           | 10          | 91 (23 to -158)     |
|                         |             | Baseline | 125 ± 51    | 83 ± 42     |                     |
|                         |             | Final    | 79 ± 39     | 127 ± 73    |                     |
|                         |             | Change   | -46 ± 45    | 44 ± 62     |                     |
|                         | Non-HD      | n        | 5           | 10          | 9 (-71 to 91)       |
|                         |             | Baseline | 145 ± 59    | 133 ± 50    |                     |
|                         |             | Final    | 154 ± 99    | 151 ± 59    |                     |
|                         |             | Change   | 9 ± 108     | 18 ± 44     |                     |
| Moderate PA (mins/day)  | HD          | n        | 5           | 10          | 13 (-32 to 57)      |
|                         |             | Baseline | 83 ± 105    | 29 ± 33     |                     |
|                         |             | Final    | 85 ± 123    | 43 ± 55     |                     |
|                         |             | Change   | 1 ± 52      | 14 ± 29     |                     |
|                         | Non-HD      | n        | 5           | 10          | 20 (40 to -79)      |
|                         |             | Baseline | 79 ± 96     | 46 ± 61     |                     |
|                         |             | Final    | 75 ± 112    | 62 ± 105    |                     |
|                         |             | Change   | -4 ± 40     | 16 ± 55     |                     |
| Vigorous PA (mins/day)  | HD          | n        | 5           | 10          | 3 (-1 to 8)         |
|                         |             | Baseline | 4 ± 9       | 1 ± 1       |                     |
|                         |             | Final    | 1 ± 2       | 1 ± 3       |                     |
|                         |             | Change   | -3 ± 7      | 0 ± 2       |                     |
|                         | Non-HD      | n        | 5           | 10          | 1 (0 to 2)          |
|                         |             | Baseline | 3 ± 0       | 1 ± 4       |                     |
|                         |             | Final    | 2 ± 5       | 1 ± 4       |                     |
|                         |             | Change   | -1 ± 2      | 0 ± 0       |                     |

Abbreviations: CI, confidence interval; HD, haemodialysis; mins, minutes; PA, physical activity.

## Supplementary material 9. Patient-reported outcomes measures after six months.

|         | Outcome               |               | Usual Care    | Exercise              | Difference (95% CI) |
|---------|-----------------------|---------------|---------------|-----------------------|---------------------|
| SF-12   | PCS                   | n             | 19            | 19                    | 0 (-4 to 5)         |
|         |                       | Baseline      | 35 ± 9        | 35 ± 10               |                     |
|         |                       | Final         | 36 ± 10       | 36 ± 10               |                     |
|         |                       | Change        | 1 ± 7         | 1 ± 7                 |                     |
|         | MCS                   | n             | 19            | 19                    | 4 (-3 to 10)        |
|         |                       | Baseline      | 43 ± 15       | 45 ± 13               |                     |
|         |                       | Final         | 46 ± 13       | 45 ± 13               |                     |
|         |                       | Change        | 4 ± 7         | 0 ± 12                |                     |
| HADS    | n                     | 20            | 17            | 0 (-3 to 4)           |                     |
|         | Baseline              | 16 ± 10       | 15 ± 9        |                       |                     |
|         | Final                 | 14 ± 10       | 13 ± 9        |                       |                     |
|         | Change                | -2 ± 5        | -2 ± 6        |                       |                     |
| POS-R   | Global severity score | n             | 20            | 18                    | 2 (-3 to 7)         |
|         |                       | Baseline      | 19 ± 14       | 19 ± 14               |                     |
|         |                       | Final         | 18 ± 14       | 20 ± 14               |                     |
|         |                       | Change        | 1 ± 6         | -1 ± 9                |                     |
|         | mean severity         | n             | 20            | 18                    | 0 (0 to 0)          |
|         |                       | Baseline      | 2 ± 1         | 2 ± 1                 |                     |
|         |                       | Final         | 2 ± 1         | 2 ± 1                 |                     |
|         |                       | Change        | 0 ± 0         | 0 ± 0                 |                     |
|         | mean number           | n             | 22            | 16                    | 0 (-1 to 2)         |
|         |                       | Baseline      | 9 ± 4         | 10 ± 4                |                     |
|         |                       | Final         | 9 ± 4         | 10 ± 5                |                     |
|         |                       | Change        | 0 ± 4         | 0 ± 2                 |                     |
| ESES    | n                     | 19            | 16            | 0 (-1 to 1)           |                     |
|         | Baseline              | 2 ± 2         | 2 ± 1         |                       |                     |
|         | Final                 | 2 ± 1         | 2 ± 1         |                       |                     |
|         | Change                | 0 ± 1         | 0 ± 1         |                       |                     |
| DPPEBBS | n                     | 19            | 15            | 3 (-4 to 11)          |                     |
|         | Baseline              | 59 ± 10       | 59 ± 15       |                       |                     |
|         | Final                 | 61 ± 10       | 65 ± 7        |                       |                     |
|         | Change                | 2 ± 7         | 6 ± 14        |                       |                     |
| DASI    | n                     | 20            | 18            | 4.93 (-0.94 to 10.80) |                     |
|         | Baseline              | 13.06 ± 12.85 | 20.29 ± 14.33 |                       |                     |
|         | Final                 | 17.29 ± 14.41 | 19.60 ± 14.59 |                       |                     |
|         | Change                | 4.22 ± 9.72   | -0.71 ± 7.92  |                       |                     |

Abbreviations: CI, confidence interval; DASI, Duke Activity Status Index; DPPEBBS, Dialysis Patients Benefits and Barriers Scale; ESES, Exercise Self efficacy Scale; HADS, Hospital Anxiety and Depression Scale; MCS, mental component summary score; POS-R, Palliative Outcomes Scale Renal, PCS, physical component summary score; VAS, visual analogue scale.

Supplementary material 10. Baseline demographic and clinical characteristics for the qualitative participants.

|                                               | <b>N=25</b>                        |          |
|-----------------------------------------------|------------------------------------|----------|
| <b>Age (years)</b>                            | 69±10                              |          |
| <b>Gender n (%)</b>                           | Female                             | 13 (52%) |
|                                               | Male                               | 12 (48%) |
| <b>Ethnicity n (%)</b>                        | White background                   | 13 (52%) |
|                                               | Asian or Asian British             | 10 (40%) |
|                                               | Caribbean                          | 1 (4%)   |
|                                               | Not stated                         | 1 (4%)   |
| <b>Diagnosis</b>                              | Diabetic nephropathy               | 11 (44%) |
|                                               | Aetiology uncertain                | 6 (24%)  |
|                                               | Chronic pyelonephritis             | 3 (12%)  |
|                                               | Atypical hemolytic uremic syndrome | 1 (4%)   |
|                                               | FSGS                               | 1 (4%)   |
|                                               | Henoch-Schönlein Purpura           | 1 (4%)   |
|                                               | Minimal change nephropathy         | 1 (4%)   |
|                                               | Polycystic kidney disease          | 1 (4%)   |
| <b>CCI</b>                                    | 6±2                                |          |
| <b>Time on HD (months)</b>                    | 43 (IQR 16-85)                     |          |
| <b>CFS n (%)</b>                              | Vulnerable                         | 9 (36%)  |
|                                               | Mildly frail                       | 5 (20%)  |
|                                               | Moderately frail                   | 8 (32%)  |
|                                               | Severely frail                     | 3 (12%)  |
| <b>Number of falls in the last six months</b> | 3 (IQR 2-4)                        |          |
| <b>Previous transplant n (%)</b>              | No                                 | 21 (84%) |
|                                               | Yes                                | 4 (16%)  |
| <b>Active on transplant list n (%)</b>        | No                                 | 22 (88%) |
|                                               | Yes                                | 3 (12%)  |

Abbreviations: CCI, Charlson comorbidity index; CFS, clinical frailty scale; FSGS, Focal segmental glomerulosclerosis; HD, haemodialysis.

Supplementary material 11. Joint display of quantitative and qualitative results, with an overall assessment of mixed-methods inferences.

|                     | Progression criteria                                              | Feasibility trial                                                                            | Qualitative results                                                                                                                                                                                                                                                                                                                                                                                                    | Mixed-methods inferences                        |
|---------------------|-------------------------------------------------------------------|----------------------------------------------------------------------------------------------|------------------------------------------------------------------------------------------------------------------------------------------------------------------------------------------------------------------------------------------------------------------------------------------------------------------------------------------------------------------------------------------------------------------------|-------------------------------------------------|
| <b>Eligibility</b>  | <b>STOP</b> <20%<br><b>GO</b> >50%<br>eligible.                   | 31% patients eligible                                                                        | No discussion. Patients not involved in screening process                                                                                                                                                                                                                                                                                                                                                              | Silence                                         |
| <b>Recruitment</b>  | <b>STOP</b> <25%<br><b>GO</b> >50%<br>recruited.                  | 52% eligible patients recruited.                                                             | <ul style="list-style-type: none"> <li>- Frailer and female participants less likely to be approached despite eligibility and have more concerns about the suitability</li> <li>- Perception that risks outweigh the potential benefit</li> <li>- Recruitment processes could be improved</li> </ul>                                                                                                                   | Complementary                                   |
| <b>Retention</b>    | <b>STOP</b> >40%<br><b>GO</b> <20%<br>lost to follow-up.          | 12 % loss to follow-up.<br>Reasons predominantly unavoidable (death, ill-health).            | Loss to follow-up attributed to: <ul style="list-style-type: none"> <li>- Illness;</li> <li>- length of trial;</li> <li>- the reality of being in the study not meeting expectations.</li> </ul>                                                                                                                                                                                                                       | Complementary                                   |
| <b>Intervention</b> | <b>STOP</b> <30%<br><b>GO</b> >70%<br>adherence over six-months.  | 74% adherence rate across the six-month exercise duration.                                   | <ul style="list-style-type: none"> <li>- IDC good use of time.</li> <li>- Participants felt safe and felt well supported.</li> <li>- IDC limited in scope.</li> <li>- Participants described a range of other important components</li> </ul>                                                                                                                                                                          | Complementary                                   |
| <b>Outcome</b>      | <b>STOP</b> <70%<br><b>GO</b> >80%<br>outcome measure completion. | Up to 89% of secondary outcome measure data missing<br>Collection of falls data challenging. | <ul style="list-style-type: none"> <li>- Number of outcomes measured to be reduced.</li> <li>- Outcome testing during HD or at home preferred.</li> <li>- 52% agreed to complete a falls diary, 12% lost.</li> <li>- STS60, ESWT and ISWT unsuitable</li> <li>- Researcher support and family involvement may increase completion</li> <li>- Outcomes measuring ADLs, participation and symptom prioritised</li> </ul> | Complementary<br><br>Silence for PA monitoring. |

Results from the feasibility trial are colour coded to depict whether they met the 'stop' (red), 'go' (green) or 'change (orange) progression criteria.

Abbreviations: ADLs, activities of daily living; ESWT, Endurance Shuttle Walk Test; IDC, intradialytic exercise; ISWT, Incremental Shuttle Walk Test; PA, physical activity; STS60, sit to stand in sixty seconds.

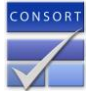

## CONSORT 2010 checklist of information to include when reporting a pilot or feasibility trial\*

| Section/Topic             | Item No | Checklist item                                                                                                                                               | Reported on page No                     |
|---------------------------|---------|--------------------------------------------------------------------------------------------------------------------------------------------------------------|-----------------------------------------|
| <b>Title and abstract</b> |         |                                                                                                                                                              |                                         |
|                           | 1a      | Identification as a pilot or feasibility randomised trial in the title                                                                                       | 1                                       |
|                           | 1b      | Structured summary of pilot trial design, methods, results, and conclusions (for specific guidance see CONSORT abstract extension for pilot trials)          | 3-4                                     |
| <b>Introduction</b>       |         |                                                                                                                                                              |                                         |
| Background and objectives | 2a      | Scientific background and explanation of rationale for future definitive trial, and reasons for randomised pilot trial                                       | 6                                       |
|                           | 2b      | Specific objectives or research questions for pilot trial                                                                                                    | 6-7                                     |
| <b>Methods</b>            |         |                                                                                                                                                              |                                         |
| Trial design              | 3a      | Description of pilot trial design (such as parallel, factorial) including allocation ratio                                                                   | 7-8                                     |
|                           | 3b      | Important changes to methods after pilot trial commencement (such as eligibility criteria), with reasons                                                     | n/a                                     |
| Participants              | 4a      | Eligibility criteria for participants                                                                                                                        | 7 and supplementary material 1          |
|                           | 4b      | Settings and locations where the data were collected                                                                                                         | 7-8,10-11                               |
|                           | 4c      | How participants were identified and consented                                                                                                               | 8                                       |
| Interventions             | 5       | The interventions for each group with sufficient details to allow replication, including how and when they were actually administered                        | 8 and supplementary material 2          |
| Outcomes                  | 6a      | Completely defined prespecified assessments or measurements to address each pilot trial objective specified in 2b, including how and when they were assessed | 9-11, supplementary materials 3,4 and 5 |
|                           | 6b      | Any changes to pilot trial assessments or measurements after the pilot trial commenced, with reasons                                                         | n/a                                     |
|                           | 6c      | If applicable, prespecified criteria used to judge whether, or how, to proceed with future definitive trial                                                  | 9 and supplementary material 3          |
| Sample size               | 7a      | Rationale for numbers in the pilot trial                                                                                                                     | 8-9                                     |



|                                                      |     |                                                                                                                                                                                             |                                                         |
|------------------------------------------------------|-----|---------------------------------------------------------------------------------------------------------------------------------------------------------------------------------------------|---------------------------------------------------------|
|                                                      | 7b  | When applicable, explanation of any interim analyses and stopping guidelines                                                                                                                | 9                                                       |
| Randomisation:                                       |     |                                                                                                                                                                                             |                                                         |
| Sequence generation                                  | 8a  | Method used to generate the random allocation sequence                                                                                                                                      | 8                                                       |
|                                                      | 8b  | Type of randomisation(s); details of any restriction (such as blocking and block size)                                                                                                      | 8                                                       |
| Allocation concealment mechanism                     | 9   | Mechanism used to implement the random allocation sequence (such as sequentially numbered containers), describing any steps taken to conceal the sequence until interventions were assigned | 8                                                       |
| Implementation                                       | 10  | Who generated the random allocation sequence, who enrolled participants, and who assigned participants to interventions                                                                     | 8                                                       |
| Blinding                                             | 11a | If done, who was blinded after assignment to interventions (for example, participants, care providers, those assessing outcomes) and how                                                    | 9                                                       |
|                                                      | 11b | If relevant, description of the similarity of interventions                                                                                                                                 | n/a                                                     |
| Statistical methods                                  | 12  | Methods used to address each pilot trial objective whether qualitative or quantitative                                                                                                      | 11                                                      |
| <b>Results</b>                                       |     |                                                                                                                                                                                             |                                                         |
| Participant flow (a diagram is strongly recommended) | 13a | For each group, the numbers of participants who were approached and/or assessed for eligibility, randomly assigned, received intended treatment, and were assessed for each objective       | 12-13 figure 1                                          |
|                                                      | 13b | For each group, losses and exclusions after randomisation, together with reasons                                                                                                            | 12-13 figure 1                                          |
| Recruitment                                          | 14a | Dates defining the periods of recruitment and follow-up                                                                                                                                     | 12                                                      |
|                                                      | 14b | Why the pilot trial ended or was stopped                                                                                                                                                    | n/a                                                     |
| Baseline data                                        | 15  | A table showing baseline demographic and clinical characteristics for each group                                                                                                            | Table 1 (trial) supplementary material 10 (qualitative) |
| Numbers analysed                                     | 16  | For each objective, number of participants (denominator) included in each analysis. If relevant, these numbers should be by randomised group                                                | Supplementary materials 6-9 and page 15-17              |
| Outcomes and estimation                              | 17  | For each objective, results including expressions of uncertainty (such as 95% confidence interval) for any estimates. If relevant, these results should be by randomised group              | Supplementary materials 6-9 and page 15-17              |
| Ancillary analyses                                   | 18  | Results of any other analyses performed that could be used to inform the future definitive trial                                                                                            | 17- 26                                                  |
| Harms                                                | 19  | All important harms or unintended effects in each group (for specific guidance see CONSORT for harms)                                                                                       | P 17                                                    |
|                                                      | 19a | If relevant, other important unintended consequences                                                                                                                                        | n/a                                                     |
| <b>Discussion</b>                                    |     |                                                                                                                                                                                             |                                                         |

|   |                          |     |                                                                                                                                                     |         |
|---|--------------------------|-----|-----------------------------------------------------------------------------------------------------------------------------------------------------|---------|
| 1 | Limitations              | 20  | Pilot trial limitations, addressing sources of potential bias and remaining uncertainty about feasibility                                           | 30      |
| 2 | Generalisability         | 21  | Generalisability (applicability) of pilot trial methods and findings to future definitive trial and other studies                                   | 26-31   |
| 3 | Interpretation           | 22  | Interpretation consistent with pilot trial objectives and findings, balancing potential benefits and harms, and considering other relevant evidence | 26-31   |
| 4 |                          | 22a | Implications for progression from pilot to future definitive trial, including any proposed amendments                                               | 26-31   |
| 5 | <b>Other information</b> |     |                                                                                                                                                     |         |
| 6 | Registration             | 23  | Registration number for pilot trial and name of trial registry                                                                                      | 4 and 7 |
| 7 | Protocol                 | 24  | Where the pilot trial protocol can be accessed, if available                                                                                        | 7       |
| 8 | Funding                  | 25  | Sources of funding and other support (such as supply of drugs), role of funders                                                                     | 31      |
| 9 |                          | 26  | Ethical approval or approval by research review committee, confirmed with reference number                                                          | 32      |

10  
11  
12  
13  
14  
15 Citation: Eldridge SM, Chan CL, Campbell MJ, Bond CM, Hopewell S, Thabane L, et al. CONSORT 2010 statement: extension to randomised pilot and feasibility trials. *BMJ*. 2016;355.

16 \*We strongly recommend reading this statement in conjunction with the CONSORT 2010, extension to randomised pilot and feasibility trials, Explanation and Elaboration for important  
17 clarifications on all the items. If relevant, we also recommend reading CONSORT extensions for cluster randomised trials, non-inferiority and equivalence trials, non-pharmacological  
18 treatments, herbal interventions, and pragmatic trials. Additional extensions are forthcoming: for those and for up to date references relevant to this checklist, see [www.consort-statement.org](http://www.consort-statement.org).  
19  
20  
21  
22  
23  
24  
25  
26  
27  
28  
29  
30  
31  
32  
33  
34  
35  
36  
37  
38  
39  
40  
41  
42

# BMJ Open

## Exercise for people living with frailty and receiving haemodialysis: a mixed-methods randomised controlled feasibility study.

|                                 |                                                                                                                                                                                                                                                                                                                                                                                                                                                                                                                                                                                                                                                                                                                                                                                                                                                                                                                                                                                                                                                                                                                                                                                                                                                                                                                                                                                                                                                                                                                                                                                                                                                                                                                                                                                                                                                                                     |
|---------------------------------|-------------------------------------------------------------------------------------------------------------------------------------------------------------------------------------------------------------------------------------------------------------------------------------------------------------------------------------------------------------------------------------------------------------------------------------------------------------------------------------------------------------------------------------------------------------------------------------------------------------------------------------------------------------------------------------------------------------------------------------------------------------------------------------------------------------------------------------------------------------------------------------------------------------------------------------------------------------------------------------------------------------------------------------------------------------------------------------------------------------------------------------------------------------------------------------------------------------------------------------------------------------------------------------------------------------------------------------------------------------------------------------------------------------------------------------------------------------------------------------------------------------------------------------------------------------------------------------------------------------------------------------------------------------------------------------------------------------------------------------------------------------------------------------------------------------------------------------------------------------------------------------|
| Journal:                        | <i>BMJ Open</i>                                                                                                                                                                                                                                                                                                                                                                                                                                                                                                                                                                                                                                                                                                                                                                                                                                                                                                                                                                                                                                                                                                                                                                                                                                                                                                                                                                                                                                                                                                                                                                                                                                                                                                                                                                                                                                                                     |
| Manuscript ID                   | bmjopen-2020-041227.R1                                                                                                                                                                                                                                                                                                                                                                                                                                                                                                                                                                                                                                                                                                                                                                                                                                                                                                                                                                                                                                                                                                                                                                                                                                                                                                                                                                                                                                                                                                                                                                                                                                                                                                                                                                                                                                                              |
| Article Type:                   | Original research                                                                                                                                                                                                                                                                                                                                                                                                                                                                                                                                                                                                                                                                                                                                                                                                                                                                                                                                                                                                                                                                                                                                                                                                                                                                                                                                                                                                                                                                                                                                                                                                                                                                                                                                                                                                                                                                   |
| Date Submitted by the Author:   | 24-Jul-2020                                                                                                                                                                                                                                                                                                                                                                                                                                                                                                                                                                                                                                                                                                                                                                                                                                                                                                                                                                                                                                                                                                                                                                                                                                                                                                                                                                                                                                                                                                                                                                                                                                                                                                                                                                                                                                                                         |
| Complete List of Authors:       | <p>Young, Hannah; University of Leicester, Department of Respiratory Sciences; University Hospitals of Leicester NHS Trust, Department of Research and Innovation</p> <p>March, Daniel; University of Leicester, Department of Cardiovascular Sciences</p> <p>Highton, Patrick; University of Leicester, Department of Cardiovascular Sciences; Loughborough University, National Centre for Sport and Exercise Medicine</p> <p>Graham-Brown, Matthew ; University of Leicester, Cardiovascular Sciences; Loughborough University, National Centre for Sport and Exercise Medicine</p> <p>Churchward, Darren; University of Leicester, Department of Cardiovascular Sciences</p> <p>Grantham, Charlotte; University of Leicester, Department of Cardiovascular Sciences</p> <p>Goodliffe, Samantha; University of Leicester, Department of Health Sciences</p> <p>Jones, William; University Hospitals of Leicester, Emergency Department, Leicester Royal Infirmary,</p> <p>Cheung, Mei-Mei; University Hospitals of Leicester, Renal, Respiratory and Cardiovascular Clinical Management Group</p> <p>Greenwood, Sharlene ; King's College Hospital, Department of Physiotherapy and Renal Medicine; King's College London, Department of Renal Medicine</p> <p>Eborall, Helen; University of Leicester, Department of Health Sciences</p> <p>Conroy, Simon; University of Leicester, Department of Health Sciences</p> <p>Singh, Sally; Leicester Biomedical Research Unit, Centre for Exercise &amp; Rehabilitation Science; University Hospitals of Leicester NHS Trust, Department of Respiratory Medicine, Glenfield Hospital</p> <p>Smith, Alice; University of Leicester, Department of Health Sciences</p> <p>Burton, James; University of Leicester, Department of Cardiovascular Sciences; Loughborough University, National Centre for Sport and Exercise Medicine</p> |
| <b>Primary Subject Heading</b>: | Renal medicine                                                                                                                                                                                                                                                                                                                                                                                                                                                                                                                                                                                                                                                                                                                                                                                                                                                                                                                                                                                                                                                                                                                                                                                                                                                                                                                                                                                                                                                                                                                                                                                                                                                                                                                                                                                                                                                                      |
| Secondary Subject Heading:      | Rehabilitation medicine                                                                                                                                                                                                                                                                                                                                                                                                                                                                                                                                                                                                                                                                                                                                                                                                                                                                                                                                                                                                                                                                                                                                                                                                                                                                                                                                                                                                                                                                                                                                                                                                                                                                                                                                                                                                                                                             |
| Keywords:                       | Dialysis < NEPHROLOGY, End stage renal failure < NEPHROLOGY,                                                                                                                                                                                                                                                                                                                                                                                                                                                                                                                                                                                                                                                                                                                                                                                                                                                                                                                                                                                                                                                                                                                                                                                                                                                                                                                                                                                                                                                                                                                                                                                                                                                                                                                                                                                                                        |

1  
2  
3  
4  
5  
6  
7  
8  
9  
10  
11  
12  
13  
14  
15  
16  
17  
18  
19  
20  
21  
22  
23  
24  
25  
26  
27  
28  
29  
30  
31  
32  
33  
34  
35  
36  
37  
38  
39  
40  
41  
42  
43  
44  
45  
46  
47  
48  
49  
50  
51  
52  
53  
54  
55  
56  
57  
58  
59  
60

|  |                                                                               |
|--|-------------------------------------------------------------------------------|
|  | REHABILITATION MEDICINE, QUALITATIVE RESEARCH, Clinical trials < THERAPEUTICS |
|  |                                                                               |

SCHOLARONE™  
Manuscripts

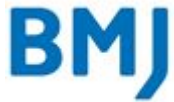

I, the Submitting Author has the right to grant and does grant on behalf of all authors of the Work (as defined in the below author licence), an exclusive licence and/or a non-exclusive licence for contributions from authors who are: i) UK Crown employees; ii) where BMJ has agreed a CC-BY licence shall apply, and/or iii) in accordance with the terms applicable for US Federal Government officers or employees acting as part of their official duties; on a worldwide, perpetual, irrevocable, royalty-free basis to BMJ Publishing Group Ltd ("BMJ") its licensees and where the relevant Journal is co-owned by BMJ to the co-owners of the Journal, to publish the Work in this journal and any other BMJ products and to exploit all rights, as set out in our [licence](#).

The Submitting Author accepts and understands that any supply made under these terms is made by BMJ to the Submitting Author unless you are acting as an employee on behalf of your employer or a postgraduate student of an affiliated institution which is paying any applicable article publishing charge ("APC") for Open Access articles. Where the Submitting Author wishes to make the Work available on an Open Access basis (and intends to pay the relevant APC), the terms of reuse of such Open Access shall be governed by a Creative Commons licence – details of these licences and which [Creative Commons](#) licence will apply to this Work are set out in our licence referred to above.

Other than as permitted in any relevant BMJ Author's Self Archiving Policies, I confirm this Work has not been accepted for publication elsewhere, is not being considered for publication elsewhere and does not duplicate material already published. I confirm all authors consent to publication of this Work and authorise the granting of this licence.

1  
2  
3  
4 1 **Exercise for people living with frailty and receiving haemodialysis: a mixed-**  
5  
6  
7 2 **methods randomised controlled feasibility study.**  
8  
9  
10 3

11  
12 4 Hannah ML Young (MSc)<sup>1,2</sup>, Daniel S March (PhD)<sup>3</sup>, Patrick J Highton (PhD)<sup>3,4</sup>, Matthew  
13  
14 5 PM Graham-Brown (PhD)<sup>3,4</sup>, Darren C Churchward (MSc)<sup>3</sup>, Charlotte Grantham (BSc)<sup>3</sup>, S  
15  
16 6 Goodliffe (MSc)<sup>5</sup>, William Jones (BAHons)<sup>6</sup>, Mei-Mei Cheung (BAHons)<sup>7</sup>, Sharlene A  
17  
18 7 Greenwood (PhD)<sup>8</sup>, Helen Eborall (PhD)<sup>9</sup>, Simon Conroy (PhD)<sup>5</sup>, Sally J Singh (PhD)<sup>10,11</sup>,  
19  
20 8 Alice C Smith (PhD)<sup>5</sup>, James O Burton (MD)<sup>3,4</sup>.

21  
22  
23  
24  
25 9 <sup>1</sup>Department of Respiratory Sciences, University of Leicester, Leicester, UK.

26  
27  
28 10 <sup>2</sup>Department of Research and Innovation, University Hospitals of Leicester, UK

29  
30  
31 11 <sup>3</sup>Cardiovascular Sciences, University of Leicester, UK.

32  
33  
34 12 <sup>4</sup>National Centre for Sport and Exercise Medicine, Loughborough University, UK.

35  
36  
37 13 <sup>5</sup>Department of Health Sciences, University of Leicester, UK.

38  
39  
40 14 <sup>6</sup> Emergency Department, Leicester Royal Infirmary, University Hospitals of Leicester, UK.

41  
42  
43 15 <sup>7</sup> Renal, Respiratory and Cardiovascular Clinical Management Group, University Hospitals of  
44  
45 16 Leicester, UK.

46  
47  
48 17 <sup>8</sup>Department of Physiotherapy and Renal Medicine, King's College Hospital and Department  
49  
50 18 of Renal Medicine, King's College London, UK.

51  
52  
53 19 <sup>9</sup>Social Science Applied to Healthcare Improvement Research (SAPPHIRE) Group,  
54  
55 20 Department of Health Sciences, University of Leicester, UK.  
56  
57  
58  
59  
60

1  
2  
3 21 <sup>10</sup>Centre for Exercise & Rehabilitation Science, Leicester Biomedical Research Unit,  
4  
5 22 Glenfield Hospital, UK.  
6  
7

8 23 <sup>11</sup>Department of Respiratory Medicine, Glenfield Hospital, University Hospitals of  
9  
10 24 Leicester,UK.  
11  
12

13  
14 25

15  
16 26 Corresponding author:

17  
18  
19 27 Hannah Young

20  
21  
22 28 Leicester Kidney Lifestyle Team

23  
24  
25 29 Academic Unit

26  
27  
28 30 Leicester General Hospital

29  
30  
31 31 Gwendolen Road

32  
33  
34 32 Leicester

35  
36  
37 33 UK

38  
39  
40 34 LE4 5PW

41  
42  
43 35 0116 258 4346

44  
45  
46 36 hmly1@le.ac.uk

47  
48  
49 37

50  
51  
52 38 Running title: Exercise for frail haemodialysis patients

53  
54  
55 39 Abstract word count: 268

56  
57  
58 40 Word count: 4300

59  
60

1  
2  
3 41 **ABSTRACT**  
4  
5

6 42 **Objectives**  
7  
8

9 43 Frailty is highly prevalent in haemodialysis (HD) patients, leading to poor outcomes. This  
10  
11 44 study aimed to determine whether a Randomised Controlled Trial (RCT) of intradialytic  
12  
13 45 exercise is feasible for frail HD patients, and explore how the intervention may be tailored to  
14  
15  
16 46 their needs.  
17

18  
19 47 **Design**  
20

21  
22 48 Mixed-methods feasibility.  
23  
24

25 49 **Setting & participants**  
26  
27

28 50 Prevalent adult HD patients of the *CYCLE-HD* trial with a Clinical Frailty Scale Score of 4-7  
29  
30 51 (vulnerable to severely frail) were eligible for the feasibility study.  
31  
32

33 52 **Interventions**  
34  
35

36 53 Participants in the exercise group undertook six-months of thrice-weekly, progressive,  
37  
38 54 moderate intensity intradialytic cycling (IDC).  
39  
40

41 55 **Outcomes**  
42  
43

44 56 Primary outcomes were related to feasibility. Secondary outcomes were falls incidence,  
45  
46 57 exercise capacity, physical function, physical activity and patient-reported outcomes  
47  
48 58 (PROMS) at baseline and six months. Acceptability of trial procedures and the intervention  
49  
50 59 were explored via diaries and interviews with n=25 frail HD patients who both participated in  
51  
52 60 (n=13, 52%), and declined (n=12, 48%), the trial.  
53  
54  
55

56 61 **Results**  
57  
58  
59  
60



1  
2  
3 62 124 (30%) patients were eligible, 64 (52%) consented and 51 (80%) completed a baseline  
4  
5 63 assessment. N=24 (71% male; 59 ± 13 years) dialysed during shifts randomly assigned to  
6  
7 64 exercise and n=27 (81% male; 65 ± 11 years) assigned to usual care. N=6 (12%) were lost to  
8  
9 65 follow-up. The exercise group completed 74% of sessions. 27 to 89% of secondary outcome  
10  
11 66 data were missing. Frail HD patients outlined several ways to enhance trial procedures.  
12  
13 67 Maintaining ability to undertake activities of daily living and social participation were  
14  
15 68 outcomes of primary importance. Participants desired a varied exercise programme.  
16  
17  
18  
19

## 20 69 **Conclusions**

21  
22  
23 70 A definitive RCT is feasible, however a comprehensive exercise programme may be more  
24  
25 71 efficacious than IDC in this population.  
26  
27

## 28 72 **Trial Registration**

29  
30  
31 73 ISRCTN11299707; ISRCTN12840463  
32  
33  
34  
35  
36  
37

38 75 **Keywords:** feasibility; frailty; exercise; haemodialysis; mixed-methods.  
39  
40  
41  
42  
43  
44  
45  
46  
47  
48  
49  
50  
51  
52  
53  
54  
55  
56  
57  
58  
59  
60

## 76 STRENGTHS AND LIMITATIONS OF THIS STUDY

- 77 • To our knowledge, this is the first study to evaluate the feasibility of an exercise  
78 intervention for people living with frailty and receiving haemodialysis (HD).
- 79 • The Clinical Frailty Scale, a frailty risk-stratification measure which has been  
80 validated in an HD population, was used to identify eligible participants.
- 81 • This study is also the first to explore how trial procedures and exercise programmes  
82 should be specifically tailored to the needs of people living with frailty and receiving  
83 HD, from their own perspectives.
- 84 • Multiple qualitative methods (interviews and diaries) were used to explore  
85 participants perceptions, providing a form of triangulation which strengthens the  
86 conclusions made.
- 87 • Due to the nature of the intervention and resource limitations, we could not blind  
88 intervention providers, outcome assessors or study participants to group allocation.

## 89 INTRODUCTION

90 Frailty, “a multidimensional syndrome of decreased physiological reserve leading to  
91 increased vulnerability to minor health stressors”, is highly prevalent within the  
92 haemodialysis (HD) population.<sup>1,2</sup> Increasing frailty is associated with worsening outcomes,  
93 including mortality, hospitalisation, falls, reduced Health-Related Quality of Life (HRQoL),  
94 psychological well-being, physical function, ability to undertake activities of daily living  
95 (ADLs) and increased symptom burden.<sup>3-5</sup>

96  
97 Despite this, frailty is not static and evidence suggests that some factors associated with  
98 frailty are amenable to change.<sup>6</sup> Whilst the possible mediating role of exercise has been  
99 discussed, to our knowledge no original studies have examined the feasibility or effectiveness  
100 of an exercise programme for people living with frailty and receiving HD.<sup>7</sup> To date, exercise  
101 interventions for HD patients have focused upon intradialytic exercise, most commonly  
102 delivered by means of a cycle ergometer (intradialytic cycling, IDC), yet little is known about  
103 whether this is the most appropriate training stimulus for frail HD patients.<sup>8</sup> In addition, HD  
104 treatment can be poorly tolerated by frail patients and therefore IDC may represent an  
105 additional stressor to which these patients are particularly vulnerable.<sup>9</sup> European renal best  
106 practice guidance highlights a need for studies which identify how exercise programmes  
107 should be more specifically tailored to the needs of frail CKD patients<sup>10</sup>, yet to date, there has  
108 also been no exploration of the needs, barriers and facilitators to exercise from the  
109 perspectives of people living with frailty and receiving HD themselves.

110  
111 The aim of this study was to determine the feasibility of conducting an RCT investigating the  
112 effects of IDC for HD patients living with frailty by: (i) estimating rates of eligibility,

1  
2  
3 113 recruitment, retention, exercise adherence and outcome acceptability; and exploring (ii) the  
4  
5 114 potential benefits of IDC across a range of secondary outcomes; and (iii) the perceptions of  
6  
7  
8 115 frail HD patients in relation to participating in clinical research, IDC and a tailored exercise  
9  
10 116 intervention.

11  
12  
13 117

## 16 118 **METHODS**

### 19 119 **Design**

22 120 A mixed-methods, prospective, randomised feasibility study was conducted alongside  
23  
24 121 concurrent qualitative diaries and interviews (Trial Registration numbers ISRCTN11299707;  
25  
26 122 ISRCTN12840463). The feasibility study was a secondary analysis of the *CYCLE-HD* trial,  
27  
28  
29 123 whose aims and methods are reported elsewhere.<sup>11</sup> The qualitative component was  
30  
31 124 underpinned by a constructivist Grounded Theory approach.<sup>12</sup> All participants provided  
32  
33 125 written informed consent.

34  
35  
36 126

### 39 127 **Participants**

42 128 Prevalent adult (over 18 years) HD patients were recruited from three centres within the UK  
43  
44 129 East Midlands Renal Network. In addition to the inclusion and exclusion criteria for the  
45  
46  
47 130 *CYCLE-HD* trial (supplementary material 1), the Clinical Frailty Scale (CFS), a risk  
48  
49 131 stratification tool, was used to identify vulnerable to severely frail participants (CFS score 4-  
50  
51 132 7).<sup>13</sup> The CFS has good predictive abilities in an HD population, good construct validity  
52  
53  
54 133 when compared with the Frailty Index, is less burdensome than the Frailty Phenotype, and has  
55  
56 134 been validated in an HD population.<sup>13-15</sup>

1  
2  
3 135 The inclusion and exclusion criteria for the qualitative component mirrored the feasibility  
4  
5 136 study and both those involved in the trial, and those who were eligible but declined to  
6  
7 137 participate, were eligible.  
8  
9

10  
11 138

### 12 13 14 139 **Randomisation**

15  
16 140 HD cohorts were randomised prior to screening, based on a computer-generated  
17  
18 141 randomisation algorithm held by the Robertson Centre for Biostatistics at the University of  
19  
20 142 Glasgow.  
21  
22

23  
24 143

### 25 26 27 144 **Recruitment**

28  
29  
30 145 Patients were screened for eligibility by their supervising nephrologist. Suitable patients were  
31  
32 146 approached during HD, and the study explained. For the qualitative component, participants  
33  
34 147 who had been involved in the feasibility study were recruited following completion of, or  
35  
36 148 withdrawal from, the trial to prevent contamination.  
37  
38

39  
40 149

### 41 42 43 150 **Exercise intervention**

44  
45  
46 151 Supplementary material 2 outlines the exercise intervention in line with TIDieR guidance.<sup>16</sup>  
47  
48 152 Briefly, following a one-month run-in, participants in the exercise group undertook thrice-  
49  
50 153 weekly supervised, moderate-intensity (Rating of Perceived Exertion, RPE 12-14) IDC  
51  
52 154 (MOTomed Letto2, Reck, Germany), for six months.<sup>17</sup> Cycling resistance was progressively  
53  
54 155 increased to maintain RPE in response to exercise adaptation. Both arms continued with usual  
55  
56 156 care HD as described elsewhere.<sup>11</sup>  
57  
58  
59  
60

157

**158 Sample size**

159 Determinations of sample size from a power calculation around a primary outcome are not  
160 relevant to a feasibility study and sample sizes of 24-50 are considered sufficient.<sup>18</sup> For the  
161 qualitative component maximum variation sampling was initially used to ensure diversity in  
162 frailty status and level of trial participation.<sup>12</sup> As understanding was gained from preliminary  
163 analyses, theoretical sampling was used to further recruit participants.<sup>12</sup> A maximum of 30  
164 interviews were planned, but data collection ceased at the point where theoretical categories  
165 were saturated and no longer generated new insight (n=25).

166

**167 Primary outcome measures**

168 The primary feasibility outcomes are presented in supplementary material 3. Judgement  
169 regarding feasibility was based upon a set of *a priori* progression criteria. For each criterion,  
170 the development of ‘stop’ (indicating when there are issues with the trial that cannot be  
171 resolved) and ‘go’ thresholds (when there are no issues that may impede the success of a  
172 trial) were co-produced by patients, clinicians and researchers.<sup>19,20</sup> Results falling between  
173 these thresholds indicated that adaptation to trial procedures may render a definitive RCT  
174 viable.<sup>20</sup>

175

**176 Baseline demographic and clinical variables**

177 Demographic and clinical characteristics were gathered from participants’ medical notes. The  
178 Charlson Comorbidity Index (CCI) was used to estimate the burden of comorbid disease.<sup>21</sup>

179

1  
2  
3 180 **Secondary outcome measures**  
4  
5

6 181 Multiple secondary outcomes were used to determine the potential effects of IDC and most  
7  
8 182 appropriate primary endpoint for a future RCT. Outcome assessors were not blinded to group  
9  
10 allocation.  
11  
12

13  
14 184

15  
16 185 Information on the number of falls, defined as ‘an unexpected event in which the participants  
17  
18 186 come to rest on the ground, floor, or lower-level’ which resulted in Emergency Department  
19  
20 187 visits and hospital admissions were collected from baseline to one year following intervention  
21  
22 188 completion from medical records and hospital episode statistics.<sup>22</sup>  
23  
24

25  
26 189

27  
28  
29 190 Field tests of exercise capacity and physical function included the Incremental Shuttle Walk  
30  
31 191 Test (ISWT), the Endurance Shuttle Walk Test (ESWT), the Short Physical Performance  
32  
33 192 Battery (SPPB) and the Sit-to Stand in Sixty Seconds (STS60).<sup>11</sup> Physical activity (PA) was  
34  
35 193 objectively measured using the SenseWear Armband (SWA) Pro 3 (BodyMedia, Inc.,  
36  
37 194 Pittsburgh PA, USA) for seven consecutive days, including HD. Established criteria were  
38  
39 195 used to ensure representative data for average daily wear-time, steps per day, and time  
40  
41 196 (minutes per day) spent in sedentary (defined as 0-1.5 METS), light (1.6-2.9 METS)  
42  
43 197 moderate (3-6 METS) and vigorous (>6 METS) PA.<sup>23</sup> PROMs collected are outlined in  
44  
45 198 supplementary material 4.<sup>11</sup> All outcomes were collected at baseline and six months.  
46  
47  
48  
49

50  
51 199

52  
53  
54 200 Serious adverse events (SAEs) were recorded and assessed from baseline to six-months as  
55  
56 201 outlined previously.<sup>11</sup>  
57  
58

59 202  
60

### 203 **Diaries and interviews**

204 Participants first completed a prospective falls diary, recognised as the current 'gold  
205 standard' for falls data collection, for up to three months to examine the feasibility of this  
206 outcome measure within a future definitive RCT.<sup>22</sup> Semi-structured interviews then explored  
207 participants' experiences of: (i) keeping a falls diary; (ii) participating in a trial; and (iii) their  
208 perceptions of IDC and a tailored exercise intervention.

209  
210 Information to support diary collection and a topic guide for the interviews (supplementary  
211 material 5) was developed by HMLY, HE and a patient and public involvement group.  
212 Topics were tailored according to the level of involvement in the trial, and the content of  
213 diaries. Interviews were conducted during HD, in the participant's home, or in the hospital by  
214 HMLY and lasted 20 to 120 minutes (mean 63 minutes). All were digitally audio-recorded  
215 and transcribed verbatim.

### 217 **Data analysis**

218 Sample characteristics are presented as mean  $\pm$  standard deviation, median (IQR) or n (%), as  
219 appropriate. Descriptive statistics and confidence intervals were used to estimate feasibility  
220 outcomes.<sup>24</sup> The percentage of exercise sessions completed was used to establish the  
221 acceptability of IDC. Outcome acceptability was determined by quantifying the amount of  
222 missing data across secondary outcomes. No imputation was performed to account for  
223 missing data. No statistical testing relating to the efficacy of the exercise intervention was  
224 undertaken, although the potential benefits of exercise were estimated.<sup>24</sup> For falls, summary  
225 data, incident rate ratio (the ratio of the incidence rate in the exercise group divided by the  
226 incidence rate in the usual care group) and 95% confidence intervals were presented.



1  
2  
3 227 Statistical analyses were performed using SPSS 24 (IBM UK Ltd, UK) and Stata 16  
4  
5 228 (StataCorp LCC,USA).  
6  
7

8 229  
9  
10  
11 230 Qualitative analysis was undertaken by HMLY and SG and informed by a constant  
12  
13 231 comparative approach.<sup>12</sup> Transcripts were reviewed, then coded line by line, followed by  
14  
15 232 focused, and then theoretical, coding.<sup>12</sup> NVivo11 software (QSR International Ltd, version  
16  
17 233 11, 2016) was used to facilitate data management. Finally, qualitative and quantitative results  
18  
19 234 were merged in a ‘joint display’ to facilitate an overall assessment of feasibility.<sup>25</sup>  
20  
21  
22

23  
24 235

## 25 26 236 **Patient and public involvement**

27  
28  
29 237 The patient and public involvement (PPI) group for this study comprised patients of all ages,  
30  
31 238 genders and ethnicities who were living with frailty and receiving HD, and their relatives.  
32  
33 239 They agreed this study was an important priority for further investigation and particularly  
34  
35 240 stressed the need to add the qualitative component. The PPI group were involved early in  
36  
37 241 ethical approval stages and were actively engaged in writing lay summaries and providing  
38  
39 242 patient perspectives on data collection procedures, ethical issues, and the study dissemination  
40  
41 243 plans. They assisted in the preparation of study documentation, interview topic guides and  
42  
43 244 diary keeping materials. During the study, members of the PPI group attended regular  
44  
45  
46  
47 245 steering meetings and were involved in co-producing the progression criteria.  
48  
49  
50

51 246

## 52 53 247 **RESULTS**

### 54 55 248 **Feasibility study** 56 57 58 59 60

1  
2  
3 249 *Eligibility and recruitment*  
4

5 250 Screening and recruitment took place from March 2015 to 2018, with data collection  
6  
7  
8 251 completed by November 2018. Figure 1 outlines the trial CONSORT. Of the 406 patients  
9  
10 252 screened in the *CYCLE-HD* trial, n=124 (30%, 95% CI 26.1% to 35.3%) were identified as  
11  
12 253 vulnerable to severely frail and therefore eligible for the feasibility study. Sixty-four  
13  
14 254 participants (52%, 95% CI 42.5% to 60.7%) consented. Reasons for declining were lack of  
15  
16 255 time or family support and reluctance to undergo outcome testing, or to be randomised. Those  
17  
18 256 who declined to participate had a median age of 73 (IQR 67-8) years. N=35 (58%) were  
19  
20 257 female and n=27 (42%) male. Twenty-five (42%) were classified as vulnerable according to  
21  
22 258 the CFS, n=17 (28%) were mildly frail, n=9 (15%) moderately frail and n=9 (15%) severely  
23  
24 259 frail. Thirteen (20%, 95% CI 11.3% to 32.2%) participants withdrew prior to baseline  
25  
26 260 assessment. N=51 (80%, 95% CI 67.8% to 88.7%) completed this assessment. Twenty-four  
27  
28 261 (47%) participants received dialysis during shifts randomised to exercise and twenty-seven  
29  
30 262 (53%) during shifts randomised to usual care.  
31  
32  
33  
34  
35  
36  
37  
38

39 264 [FIGURE ONE TRIAL CONSORT TO BE INSERTED HERE]  
40  
41  
42  
43  
44

45 266 *Participant characteristics*  
46

47 267 Table 1 displays the characteristics of the trial participants at baseline. Groups were well  
48  
49 268 matched across most variables. A lower proportion of participants were female (23.5%) and  
50  
51 269 severely frail (6%) overall.  
52  
53  
54  
55  
56  
57  
58  
59  
60

270 *Table 1. Baseline demographic and clinical characteristics of the trial participants.*

|                               |                              | Usual care<br>(n=27) | Exercise<br>(n=24) | All<br>(n=51)   |
|-------------------------------|------------------------------|----------------------|--------------------|-----------------|
| Age (years)                   |                              | 65 ± 11              | 59 ± 13            | 63 ± 12         |
| Sex (n, %)                    | Female                       | 5 (19%)              | 7 (29%)            | 12 (23.5%)      |
| Ethnicity (n, %)              | White                        | 12 (44%)             | 11 (41%)           | 23 (45%)        |
|                               | Asian or Asian<br>British    | 11 (41%)             | 11 (46%)           | 22 (43%)        |
|                               | Caribbean                    | 1 (4%)               | 0 (0%)             | 1 (2%)          |
|                               | Other ethnic                 | 1 (4%)               | 1 (4%)             | 2 (4%)          |
|                               | Not stated                   | 2 (7%)               | 1 (4%)             | 3 (6%)          |
| Diagnosis (n, %)              | Aetiology<br>Uncertain       | 8 (29%)              | 7 (29%)            | 15 (29%)        |
|                               | Diabetic<br>Nephropathy      | 5 (19%)              | 7 (29%)            | 12 (23%)        |
|                               | Glomerulonephritis           | 5 (19%)              | 3 (14%)            | 8 (16%)         |
|                               | Renal Vascular<br>Disease    | 3 (11%)              | 2 (8%)             | 5 (10%)         |
|                               | Other diagnoses              | 4 (15%)              | 1 (4%)             | 5 (10%)         |
|                               | Chronic<br>Pyelonephritis    | 2 (7%)               | 1 (4%)             | 3 (6%)          |
|                               | Polycystic Kidney<br>Disease | 0 (0%)               | 2 (8%)             | 2 (4%)          |
|                               | Not recorded                 | 0 (0%)               | 1 (4%)             | 1 (2%)          |
| CCI                           |                              | 5 ± 2                | 5 ± 2              | 5 ± 2           |
| Previous transplant (n,<br>%) | No                           | 21 (75%)             | 18 (75%)           | 39 (76.5%)      |
|                               | Yes                          | 6 (21%)              | 6 (25%)            | 12 (23.5%)      |
| Time on HD (months)           |                              | 17 (7-53)            | 13 (10-61)         | 16 (8-53)       |
| BMI (kg/m <sup>2</sup> )      |                              | 27.38 ±<br>6.72      | 25.87 ±<br>5.28    | 26.67 ±<br>6.07 |
| Total no. medications         |                              | 12 ± 4               | 12 ± 4             | 12 ± 4          |
| Clinical Information          | Albumin (g/L)                | 35.4 ± 4.4           | 37.4 ± 4.3         | 36.4 ± 4.4      |
|                               | Haemoglobin (g/L)            | 107 ± 12             | 112 ± 17           | 107 ± 15        |
| Haemodialysis                 | URR (%)*                     | 74 (70-80)           | 75 (58-79)         | 74 (71-79)      |
|                               | SBP (mmHg)                   | 143 ± 21             | 144 ± 21           | 144 ± 21        |
|                               | DBP (mmHg)*                  | 65 (62-78)           | 78 (69-86)         | 76 (62-81)      |
| CFS (n, %)                    | 4, Vulnerable                | 13 (48%)             | 10 (42%)           | 23 (45%)        |
|                               | 5, Mildly frail              | 5 (18.5%)            | 7 (29%)            | 12 (23.5%)      |
|                               | 6, Moderately frail          | 8 (30%)              | 5 (21%)            | 13 (25.5%)      |
|                               | 7, Severely frail            | 1 (3.5%)             | 2 (8%)             | 3 (6%)          |

271 *Values reported are mean and SD (±), except for \*median and IQR. Abbreviations: BMI, body mass*  
 272 *index; CCI, Charlson Comorbidity Index; CFS, Clinical Frailty Scale DBP, diastolic blood pressure;*  
 273 *SBP, systolic blood pressure; URR, urea reduction ratio*

274 *Retention*

275 Six (12%, 95% CI 4.4% to 23.9%) participants were lost to follow-up: three participants  
 276 withdrew due to ill-health, one moved away, one changed HD regime and one withdrew  
 277 consent.

278

279 *Exercise adherence*

280 A mean of  $61 \pm 17$  exercise sessions were completed over the six-month intervention,  
 281 representing an adherence rate of  $74 \pm 20\%$ . The most frequent reasons for missing an exercise  
 282 session were declining ( $n = 175$  out of 535 sessions omitted in total, 33%), feeling unwell ( $n =$   
 283 116, 22%) and pain ( $n = 105$ , 20%). Table 2 summarises the mean amount of exercise  
 284 achieved. On average, participants reached the prescribed level of exercise by six months,  
 285 although  $n = 18$  (75%) were unable to achieve this by the end of the one-month run-in period.

286 *Table 2 Mean (SD) exercise achieved per session over the six-month duration of the*  
 287 *intervention.*

|                            |             |
|----------------------------|-------------|
| Duration (mins)            | $35 \pm 8$  |
| Speed (RPM)                | $63 \pm 10$ |
| Intensity (RPE)            | $13 \pm 1$  |
| Gear                       | $9 \pm 4$   |
| Distance (Miles)           | $7 \pm 3$   |
| Power (Watts)              | $13 \pm 6$  |
| Energy expenditure (Kcals) | $64 \pm 31$ |

288 *All data presented as mean and SD ( $\pm$ ). Abbreviations: kcals, kilocalories, mins, minutes; RPE, rating*  
 289 *of perceived exertion; RPM, revolutions per minute.*

290  
 291 *Outcome acceptability*

292 For tests of exercise capacity (ISWT and ESWT);  $n = 14$  (27%) did not complete at least one  
 293 test at baseline,  $n = 30$  (64%) at interim and  $n = 26$  (58%) at final. For tests of physical function;  
 294  $n = 20$  (39%) did not complete at least one test at baseline,  $n = 33$  (70%) at interim and  $n = 30$   
 295 (67%) at final. For PROMs;  $n = 27$  (53%) did not complete at least one questionnaire at

1  
2  
3 296 baseline, n=27 (57%) at interim and n=40 (89%) at final. For PA data; n=21 (41%) were  
4  
5 297 missing at baseline, and n=26 (58%) were missing at the final assessment. Declining was the  
6  
7 298 primary reason for non-completion for all outcomes across all time points.  
8  
9

10  
11 299

12  
13  
14 300 *Secondary outcomes*

15  
16 301 Summary falls data are presented in supplementary material 6. The crude falls incident rate  
17  
18 302 ratio (IRR) was 1.95 (95% CI 0.63 to 7.18), suggestive of an almost two-fold increased  
19  
20 303 incidence of falls within the usual care group.  
21  
22

23  
24 304

25  
26 305 Exercise capacity was maintained in the exercise group, but deteriorated in the usual care  
27  
28 306 group, resulting in an overall difference of 36m (95% CI -12 to 84) in ISWT results and 181  
29  
30 307 seconds (95% CI -92 to 453) in EWST time. The time taken to complete the STS5 also  
31  
32 308 increased in the usual care group (suggesting a deterioration in function), but was maintained  
33  
34 309 in the exercise group, resulting in an overall difference of 5 seconds (95% CI -4 to 15)  
35  
36 310 (supplementary material 7).  
37  
38  
39

40  
41 311

42  
43  
44 312 Step count increased in the exercise group resulting in an overall difference of 859 steps/day  
45  
46 313 (95%CI -825 to 2543) on HD days and 888 steps/day (95%CI -84 to 1861) on non-HD days.  
47  
48 314 Whilst sedentary time was increased in the exercise group on all days compared with the  
49  
50 315 usual care group, this appeared to be offset by increases in light PA and moderate PA, and  
51  
52 316 maintenance (albeit of low levels) of vigorous PA versus maintenance or deterioration across  
53  
54 317 the same metrics in the usual care group (supplementary material 8). For PROMs, outcomes  
55  
56 318 were largely unchanged, except for the DASI score, which appeared to deteriorate in the  
57  
58 319 exercise group and increase in the usual care group, resulting in an overall difference in score  
59  
60

1  
2  
3 320 of 4.93 (95% CI -0.94 to 10.80) and the mental component summary score of the SF12 which  
4  
5 321 improved in the usual care group, resulting in an overall difference in score of 4 (95% CI -3  
6  
7 322 to 10). Exercisers appeared to have a greater perception of the benefits of exercise compared  
8  
9 323 with those in the control group (3, 95% CI -4 to 11) (supplementary material 9).  
10  
11  
12

13 324

16 325 *Serious adverse events*

17  
18 326 In total, n=13 (25%) experienced an SAE during the feasibility study, n=8 (33%) in the  
19  
20 327 exercise group and n=5 (19%) in the usual care group. The most common reasons for SAEs  
21  
22 328 were vascular access complications (n=3, 17%), stroke (n=3, 17%), acute coronary syndrome  
23  
24 329 (n=2, 11%) and non-specific chest pain (n=2, 11%). All events were classed as serious as  
25  
26 330 they resulted in hospitalisation. All events resolved, and none were directly related to the  
27  
28 331 intervention or trial.  
29  
30  
31  
32

33 332

36 333 **Qualitative findings**

37  
38 334 Thirty-seven patients were approached for the qualitative study. Twenty-six were recruited  
39  
40 335 and one died prior to data collection. Thirteen had participated in the feasibility trial. Nine  
41  
42 336 received dialysis during shifts randomised to exercise, and four randomised to usual care.  
43  
44 337 Twelve participants had declined to take part in the feasibility trial. Full characteristics for the  
45  
46 338 qualitative sample are provided in supplementary material 10.  
47  
48  
49  
50

51 339

52  
53 340 In addition to categories relating to the feasibility outcomes, categories relating to both the  
54  
55 341 delivery and the characteristics of a tailored exercise intervention were identified. These are  
56  
57 342 presented alongside illustrative quotes within Tables 3, 4, 5 and 6 and Figure 2.  
58  
59  
60

1  
2  
3 343  
4  
56 344 *Feasibility and acceptability of a definitive trial*  
78 345 *Eligibility and recruitment*  
9

10 346 Declining to participate was underpinned by a perception that the trial could worsen overall  
11  
12 347 health, particularly amongst those who had not previously participated in research or had  
13  
14 348 recently commenced HD. Female participants believed that exercise was predominantly for  
15  
16 349 men and that they were already doing enough daily activity, whilst participants living with  
17  
18 350 moderate to severe frailty viewed ageing as an inevitable decline unlikely to be influenced by  
19  
20 351 exercise. Motivators included a sense of altruism, and the perception that participation could  
21  
22 352 provide opportunities to improve individual outcomes; learn about their own health; and  
23  
24 353 access better healthcare. Participants felt that recruitment could be enhanced by the effective  
25  
26 354 use of non-verbal communication, rapport building, adaptation to study documentation and  
27  
28 355 actively involving family members in the recruitment process, as family support was often a  
29  
30  
31  
32  
33  
34 356 prerequisite to participation (Table 3).

35  
36  
37 357  
3839 358 *Trial retention*  
40

41  
42 359 The primary reasons for withdrawal were becoming unwell, the duration of the trial and the  
43  
44 360 research not meeting participants expectations. Participants suggested that having a rapport  
45  
46 361 and maintaining regular dialogue with the research team might help retain participants within  
47  
48  
49 362 a future trial (Table 3).  
50  
51  
52  
53  
54  
55  
56  
57  
58  
59  
60

1  
2  
3  
4  
5  
6  
7  
8  
9  
10  
11  
12  
13  
14  
15  
16  
17  
18  
19  
20  
21  
22  
23  
24  
25  
26  
27  
28  
29  
30  
31  
32  
33  
34  
35  
36  
37  
38  
39  
40  
41  
42  
43  
44  
45  
46  
47  
48  
49  
50  
51  
52  
53  
54  
55  
56  
57  
58  
59  
60

363 *Table 3. Categories relating to trial eligibility, recruitment and retention with illustrative*  
364 *quotes.*

For peer review only



1  
2  
3 365 *The acceptability of IDC*  
4

5 366 IDC was generally perceived to be a safe and positive use of HD treatment time. However,  
6  
7 367 IDC was described as limited in scope, and participants were uncertain of its impact,  
8  
9  
10 368 particularly upon mobility, symptoms and falls (Table 4).  
11  
12

13 369

16 370 *Table 4. Categories relating to the acceptability of IDC outcome acceptability and*  
17 371 *illustrative quotes.*  
18

19 372

22 373 *Outcome acceptability*  
23

24 374 As indicated by participant quotations in Table 5, the number of outcomes and follow-ups  
25  
26 375 needed to be reduced and participants had a strong preference for outcomes that could be  
27  
28 376 collected during HD treatment. Many found the ISWT and STS60 assessments too  
29  
30 377 challenging. Participants were occasionally uncertain of the purpose of the questionnaires and  
31  
32 378 many reported difficulty quantifying symptom severity or a desire to provide ‘anticipated’  
33  
34 379 responses.  
35  
36  
37  
38

39 380

42 381 Maintaining mobility, and the ability to undertake a range of ADLS and social roles were  
43  
44 382 viewed as key outcomes for a future trial. Only thirteen (52%) participants in the qualitative  
45  
46 383 study agreed to complete a falls diary and many reported they preferred falls information to  
47  
48 384 be collected during HD treatment. The majority who had fallen rarely reported them to  
49  
50 385 healthcare professionals, believing that they were an expected consequence of HD or having  
51  
52 386 had experience of their concerns about falls being overlooked. Consequently, falls prevention  
53  
54 387 was not viewed as a key outcome.  
55  
56  
57  
58  
59  
60

1  
2  
3  
4  
5  
6  
7  
8  
9  
10  
11  
12  
13  
14  
15  
16  
17  
18  
19  
20  
21  
22  
23  
24  
25  
26  
27  
28  
29  
30  
31  
32  
33  
34  
35  
36  
37  
38  
39  
40  
41  
42  
43  
44  
45  
46  
47  
48  
49  
50  
51  
52  
53  
54  
55  
56  
57  
58  
59  
60

388 *Table 5. Categories relating to outcome acceptability and illustrative quotes.*

For peer review only

1  
2  
3 389 *Perceptions of a tailored exercise programme*  
4

5  
6 390 *Delivery*  
7

8 391 There was no universally acceptable setting for exercise delivery (Table 6). Vulnerable and  
9  
10 392 mildly frail participants (CFS 4-5) were particularly open to group-based exercise in the  
11  
12 393 community or gym, which they felt would provide motivation through camaraderie with  
13  
14 394 others. However, access barriers due to HD treatment, complex health needs, and lack of  
15  
16 395 transport were common. Participants also described feeling self-conscious exercising  
17  
18 396 amongst 'normal' people. Home-based exercise was preferred by those with moderate to  
19  
20 397 severe frailty (CFS 6-7) due to easier access, greater flexibility and relevance to their daily  
21  
22 398 activities. Despite this, concerns about lack of space and safety were highlighted by those  
23  
24 399 who lived alone, whilst those with family were concerned about overburdening or injuring  
25  
26 400 them by asking for support.  
27  
28  
29  
30  
31  
32  
33  
34  
35  
36  
37  
38  
39  
40  
41  
42  
43  
44  
45  
46  
47  
48  
49  
50  
51  
52  
53  
54  
55  
56  
57  
58  
59  
60

1  
2  
3 401 *Table 6. Participants perceptions of the facilitators and barriers to group and home-based exercise.*  
4  
5  
6  
7  
8  
9  
10  
11  
12  
13  
14  
15  
16  
17  
18  
19  
20  
21  
22  
23  
24  
25  
26  
27  
28  
29  
30  
31  
32  
33  
34  
35  
36  
37  
38  
39  
40  
41  
42  
43  
44  
45  
46

For peer review only

1  
2  
3 402 *Characteristics of a tailored exercise programme*  
4

5 403 Irrespective of the setting for delivery, participants identified several key features of a  
6  
7 404 tailored exercise intervention which are summarised in Figure 2.  
8  
9

10  
11 405

12  
13 406 [FIGURE TWO. THE CORE COMPONENTS OF AN ACCEPTABLE EXERCISE  
14  
15 407 PROGRAMME FOR PEOPLE LIVING WITH FRAILITY AND RECEIVING  
16  
17 408 HAEMODIALYSIS TO BE INSERTED HERE]  
18  
19

20  
21 409

22  
23  
24 410 *Preparation*

25  
26 411 Participants lived with a range of debilitating symptoms, most frequently fatigue, pain and  
27  
28 412 dyspnoea. Often daily activity alone was felt to be enough of a challenge. Common impacts  
29  
30 413 of exercise (for example breathlessness whilst exercising) were interpreted as worsening  
31  
32 414 symptoms or damage, and many participants were uncertain if exercise would be suitable or  
33  
34 415 beneficial. They indicated that the reason for exercising needed to be sufficiently compelling.  
35  
36 416 They wanted to know what to expect prior to exercising, and individualised goal setting was  
37  
38 417 advocated to build motivation and appreciate improvements.  
39  
40

41  
42  
43 418

44  
45  
46 419 *Content*

47  
48 420 Key components described were whole body resistance, aerobic and balance training. Many  
49  
50 421 participants described being unable to get up once they had fallen and felt that practising this  
51  
52 422 was also important. Routine physical activity was viewed as more purposeful than structured  
53  
54 423 exercise 'for the sake of it' and participants spoke of their enjoyment of being outside and  
55  
56 424 engaging in meaningful and physically active hobbies.  
57  
58  
59  
60

1  
2  
3 425  
4  
56 426 *Structure*  
7

8 427 Supervision was viewed as essential to select, teach and progress exercises. Individual  
9  
10 428 tailoring which considered the impact of disability, comorbidities and fluctuating symptoms  
11  
12  
13 429 was important, and a choice of exercises, for example swimming, dancing and yoga, was  
14  
15 430 associated with increased enjoyment and engagement. Moderate to severely frail participants  
16  
17 431 wanted the programme to be progressed in a supportive and collaborative manner. Those who  
18  
19 432 were vulnerable or mildly frail wanted to be ‘pushed’ and progressed in a more assertive  
20  
21 433 manner.  
22  
23  
24

25 434

26  
27  
28 435 Having a companion (typically peers, family or friends) was viewed as helping to overcome  
29  
30 436 access barriers and provide socialisation and mutual motivation. The sharing of experience  
31  
32 437 was also seen as a powerful means of challenging preconceptions about exercise ability,  
33  
34 438 although participants with moderate to severe frailty raised concerns about feeling  
35  
36 439 embarrassed or ‘judged’ if they were less able.  
37  
38  
39

40 440

41  
42  
43 441 **Integrated mixed-methods analyses**  
44

45  
46 442 The integrated qualitative and quantitative findings suggest that an RCT of IDC is feasible for  
47  
48 443 frail HD patients following adaptation. However, IDC should not be the only intervention  
49  
50 444 offered and the development of a multicomponent programme is warranted (Supplementary  
51  
52 445 material 11).  
53  
54  
55

56 446

57  
58  
59 447 **DISCUSSION**  
60

1  
2  
3 448 These results suggest that an RCT of IDC is feasible for frail HD patients with adaptation to  
4  
5 449 increase outcome acceptability and eligibility rates. Adherence to IDC was high and it was  
6  
7 450 viewed as a safe and efficient use of HD treatment time. Secondary outcomes also suggest  
8  
9 451 that, for HD patients with a CFS of 4-7, IDC may mitigate deterioration in exercise capacity,  
10  
11 452 endurance and functional muscle strength and increase PA behaviour (steps/day). Despite  
12  
13 453 this, participants described a preference for a multi-component programme that prepared  
14  
15 454 them for exercise, offered variety, companionship and individualised supervision. No single  
16  
17 455 preferred environment for the delivery of this intervention was identified, but appeared to be  
18  
19 456 influenced by frailty grade and individual factors.  
20  
21  
22  
23

24  
25 457

26  
27 458 27% to 89% of secondary outcome measure data were missing, and, overall, this progression  
28  
29 459 criterion was not achieved. Given that secondary measures are often insufficiently powered,  
30  
31 460 reducing the number collected within a future trial may improve completion.<sup>26</sup> Falls were not  
32  
33 461 of primary importance to participants, and aligns with the SONG-HD data which did not  
34  
35 462 identify falls as a key outcome.<sup>27</sup> Our findings suggest that accurately capturing prospective  
36  
37 463 falls data may be challenging due to under-reporting, and yet, retrospective falls data  
38  
39 464 collection does not fully reflect the incidence and impact of falls, particularly those which do  
40  
41 465 not require an ED visit or hospital admission. Given the high incidence of falls in this  
42  
43 466 population, capturing falls data may be important in a future trial, and regular prospective  
44  
45 467 recording of information relating to falls as a part of routine practice at the dialysis unit is  
46  
47 468 recommended, in line with participant feedback.<sup>5</sup> This would provide both clinicians and  
48  
49 469 researchers with higher quality data for use in both prospective and retrospective studies, and  
50  
51 470 to inform clinical care.  
52  
53  
54  
55  
56  
57

58 471  
59  
60

1  
2  
3 472 Further exploration and validation of meaningful measures for HD patients living with frailty  
4  
5 473 is also warranted. Some of the functional measures (the STS60 and ISWT) included were too  
6  
7 474 challenging. In the absence of a core set of functional outcome measures for older people, or  
8  
9  
10 475 people receiving haemodialysis, we suggest that the SPPB may be most appropriate and  
11  
12 476 feasible method of capturing information about mobility and function. Although challenges  
13  
14 477 with ceiling effects have been identified, this measure had the lowest levels of non-  
15  
16 478 completion within this study, and has demonstrated good test-retest reliability in HD patients  
17  
18 479 and excellent validity and responsiveness to change following an intervention in older adults.  
19  
20  
21 480 <sup>28,29</sup>To date, more comprehensive measures of basic and instrumental ADL ability and  
22  
23 481 participation have rarely been used in exercise studies. These outcomes were, however,  
24  
25 482 highlighted as important within this study, and have also been included in guidelines and core  
26  
27 483 outcomes sets for HD and older people, warranting their inclusion in future exercise studies  
28  
29 484 relating to frail HD populations.<sup>27,30,31</sup>  
30  
31  
32  
33 485  
34  
35  
36 486 The results of this study indicate that changes to eligibility criteria and screening are required.  
37  
38 487 As only patient participants were interviewed, it was not possible to gain any insight on this  
39  
40 488 aspect of feasibility from the qualitative component. Importantly, the challenges of  
41  
42 489 identifying eligible participants do not appear to be unique to this study. Studies of older  
43  
44 490 people living with frailty highlight that large numbers need to be screened to achieve a 50%  
45  
46 491 recruitment rate, and a multicentre trial may be required.<sup>26</sup> Higher proportions older, female  
47  
48 492 and more severely frail HD patients declined to participate whilst the qualitative data indicated  
49  
50 493 this was due to negative perceptions relating to participation in both exercise and research.  
51  
52 494 Such findings clearly have implications for the external validity of a future trial and the reach  
53  
54 495 of the intervention at the point of implementation.<sup>24</sup>  
55  
56  
57  
58  
59  
60



1  
2  
3 496  
4  
5

6 497 To address this, this study suggests the recruitment strategies which utilise effective non-  
7  
8 498 verbal communication skills to build rapport and explore participants' perceptions of the  
9  
10 499 intervention and the research process, and subsequently provide balanced information about  
11  
12 500 the study, may lead to more representative recruitment. A sense of equipoise may be  
13  
14 501 preserved by emphasising altruism, access to potentially enhanced care, and an opportunity to  
15  
16 502 learn about their health (which were all identified as motivators to participation), rather than  
17  
18 503 the potential individual benefits of the intervention itself. Involving families and/or peer  
19  
20 504 supporters who have experience of the study and intervention in the recruitment process, and  
21  
22 505 introducing opportunities for participants to observe the exercise intervention, may also be  
23  
24 506 beneficial. Ultimately the selection of these strategies will depend upon the resources  
25  
26 507 available and the need to strike a balance between conducting a trial with high internal and  
27  
28 508 external validity and going beyond what is pragmatically possible to engage patients in the  
29  
30 509 intervention at the implementation phase.  
31  
32  
33  
34  
35  
36  
37  
38  
39

40  
41  
42  
43  
44  
45  
46  
47  
48  
49  
50  
51  
52  
53  
54  
55  
56  
57  
58  
59  
60

511 This study suggests that IDC may reduce the incidence of falls resulting in ED visits and  
512 hospital admissions in frail HD patients potentially by attenuating a decline in exercise  
513 capacity, physical activity behaviour and function at levels shown to be clinically meaningful  
514 in other long-term conditions.<sup>32,33</sup> This indicates that preventing deterioration may be as  
515 valuable, and more attainable, as improving outcomes in a frail population. Despite this, frail  
516 participants experienced difficulties achieving the proposed level of exercise and maintaining  
517 motivation in the face of varying symptomology. Exercise programmes have a dose-response,  
518 and these factors may have reduced participants physical capability to exercise and achieve  
519 optimal benefit, despite the overall good level of adherence. Clinical decision support tools

1  
2  
3 520 have been used in other populations to rationalise exercise prescription, progression and  
4  
5 521 amendment in the presence of varying symptomology, and a similar approach may be  
6  
7  
8 522 beneficial for frail HD patients.<sup>34</sup>  
9

10  
11 523

12  
13 524 This study indicates that participants desire a multicomponent exercise programme, and  
14  
15  
16 525 require an intervention that addresses their particularly low levels of PA. Whilst step count  
17  
18 526 and time spent in light and moderate PA increased following IDC, these were below PA  
19  
20 527 recommendations for older people.<sup>35</sup> To date, PA interventions for HD patients have  
21  
22  
23 528 predominantly centred around walking, which may not be appropriate for those living with  
24  
25 529 frailty.<sup>36-39</sup> This study suggests that functional training (task-orientated exercise which  
26  
27 530 engages multiple muscle groups) and physical activity that focuses on ‘doing more’ of these  
28  
29  
30 531 usual tasks may be more acceptable and efficacious. To date, two studies have employed  
31  
32 532 similar approaches with non-frail HD patients. One study demonstrated significant  
33  
34 533 improvements in lower extremity performance and the other a non-significant improvement  
35  
36 534 in physical function and maintenance of other SF-36 domains compared with the control  
37  
38  
39 535 group.<sup>40,41</sup> In older people without CKD who are living with frailty, functional training  
40  
41 536 included as part of a multicomponent exercise programme is beneficial across a range of  
42  
43 537 outcomes, including greater ability to rise from the floor following a fall.<sup>39,42-45</sup> A similar  
44  
45 538 approach to exercise prescription may be warranted in a frail HD population.  
46  
47

48  
49 539

50  
51 540 Numerous barriers and facilitators to exercise were identified within this study, which have  
52  
53 541 implications for the design of a programme. The use of theory is crucial in the development  
54  
55 542 of effective interventions and the behaviour change wheel (BCW) is most frequently cited in  
56  
57 543 the development of interventions in CKD<sup>46</sup>. Mapping the identified barriers and facilitators to  
58  
59  
60

1  
2  
3 544 the BCW indicates that ameliorating symptom burden prior to exercise, individualised  
4  
5 545 exercise counselling, and a collaborative, problem-solving approach to exercise education are  
6  
7 546 most likely to encourage and sustain participation.<sup>46,47</sup> Devising ways in which peer and  
8  
9  
10 547 family involvement can be incorporated into the programme may also increase motivation  
11  
12 548 and opportunity to exercise but should be carefully managed given the potential for negative  
13  
14 549 comparison amongst the frailest patients.

15  
16  
17 550

18  
19  
20 551 A lack of preferred environment for intervention delivery may have implications for a  
21  
22 552 definitive RCT. Exercise interventions require motivation, and limited engagement may  
23  
24 553 negatively influence a trials external and internal validity. Ignoring patient preference is also  
25  
26 554 out of step with clinical practice, where rehabilitation involves shared decision-making.  
27  
28  
29 555 Taken together, these factors have implications for determining treatment effects and future  
30  
31 556 intervention implementation.<sup>48</sup> There is increasing recognition that novel trial designs may be  
32  
33 557 indicated when evaluating complex interventions and a Partially Randomised Patient  
34  
35 558 Preference Trial, where participants without preference are randomised whilst those with a  
36  
37 559 preference receive their choice, would provide information on both the efficacy of the  
38  
39 560 intervention and the influence of preference.<sup>48,49</sup>

40  
41  
42  
43  
44 561

## 45 46 47 562 **Strengths and limitations**

48  
49  
50 563 To our knowledge, this study is the first to examine the feasibility of an RCT of IDC for frail  
51  
52 564 HD patients and to explore how trial procedures and exercise programmes should be  
53  
54 565 specifically tailored to the needs of this group, from their own perspectives. Key strengths  
55  
56 566 were the use of a validated frailty risk-stratification measure and multiple qualitative methods  
57  
58 567 which provided a form of triangulation.<sup>50</sup> There were, however, challenges to recruiting

1  
2  
3 568 severely frail participants, and those from a more diverse range of black and minority ethnic  
4  
5 569 groups, to both the trial and the qualitative study. Additionally, the views of clinicians and  
6  
7  
8 570 researchers were not explored. A future RCT should also blind outcome assessors to group  
9  
10 571 allocation to reduce the potential for detection bias. Finally, this study is exploratory and  
11  
12 572 therefore all secondary measures of exercise capacity, function and PROMS should be  
13  
14 573 interpreted with caution, not least due to the high number of participants who did not  
15  
16  
17 574 complete the follow up tests.  
18  
19  
20 575

## 23 576 **Conclusion**

26 577 In summary, this study suggests that a future definitive trial of IDC is feasible within a HD  
27  
28 578 population with a CFS of 4-7 and paying particular attention in the design to those factors  
29  
30 579 mentioned above may facilitate improved rates of eligibility and outcome completion.  
31  
32 580 Outcomes focusing on independence and participation should be the primary outcomes of  
33  
34 581 interest in a future trial. Whilst an exploratory analysis suggests some potential benefits to  
35  
36 582 IDC, a tailored intervention comprising a comprehensive multi-component programme,  
37  
38 583 symptom management, education and behaviour change is better suited to frail HD patients'  
39  
40 584 needs.  
41  
42  
43  
44  
45 585

## 48 586 **ACKNOWLEDGEMENTS**

51 587 The authors would like to thank the staff and patients at all units, Fresenius Medical Care and  
52  
53 588 The Leicester Kidney Care Appeal. The authors also wish to thank Freya Tyrer for sharing her  
54  
55 589 statistical expertise.  
56  
57  
58 590  
59  
60

1  
2  
3 591 **COMPETING INTERESTS**  
4  
5

6 592 The authors have no conflicts of interest to declare.  
7  
8

9 593  
10  
11

12 594 **FUNDING**  
13  
14

15 595 The work was funded by the National Institute for Health Research (NIHR) Leicester  
16

17 596 Biomedical Research Centre, Collaboration for Leadership in Applied Health Research and  
18

19 597 Care East Midlands (CLAHRC EM) and partly funded by the Stoneygate Trust. H.M.L.Y.  
20

21 598 and J.O.B. are supported by grants from the NIHR (DRF-2016-09-015 and CS-2013-13-014).  
22  
23

24 599 S.J.S. is supported by the Collaboration for Leadership in Applied Health Research and Care  
25

26 600 East Midlands. The views expressed in this publication are those of the authors and not  
27  
28

29 601 necessarily those of the NHS, the NIHR or the Department of Health and Social Care. The  
30

31 602 funders had no role in the study design; collection, analysis, and interpretation of the data;  
32  
33

34 603  
35

36 604 **AUTHORS CONTRIBUTIONS**  
37  
38

39 605 Literature search: HMLY; Research idea and study design: HMLY, JOB; participant  
40

41 606 recruitment: HMLY, DS, PH, DC, MPMGB, JOB, CG; data acquisition: HMLY, DS,PH,DC,  
42  
43

44 607 MPMGB,CG WJ, MC; clinical governance: JOB; data analysis: HMLY, SG; statistical  
45

46 608 analysis: HMLY; supervision and mentorship: SC, HE, SG, SJS, ACS, JOB; manuscript  
47  
48

49 609 preparation: HMLY; reviewed final manuscript: all. Each author contributed important  
50

51 610 intellectual content during manuscript drafting or revision and accepts accountability for the  
52

53 611 overall work by ensuring that questions pertaining to the accuracy or integrity of any portion  
54

55 612 of the work are appropriately investigated and resolved. All authors have read and approved  
56  
57

58 613 the final version  
59  
60

1  
2  
3 614  
4  
5

6 615 **ETHICAL APPROVAL**  
7

8  
9 616 This study was approved by the East Midlands (Northampton; REC ref: 14/EM/1190) and  
10  
11 617 South West (Bristol; REC ref: 17/SW/0048) NHS Research Ethics Committees for the trial  
12  
13  
14 618 and the qualitative component respectively  
15

16  
17 619  
18

19  
20 620 **DATA SHARING STATEMENT**  
21

22  
23 621 The datasets used and analysed during the current study are available from the corresponding  
24  
25 622 author on reasonable request.  
26  
27  
28  
29  
30  
31  
32  
33  
34  
35  
36  
37  
38  
39  
40  
41  
42  
43  
44  
45  
46  
47  
48  
49  
50  
51  
52  
53  
54  
55  
56  
57  
58  
59  
60

623 **REFERENCES**

- 624 1. Clegg A, Young J, Iliffe S, et al. Frailty in elderly people. *The Lancet*.  
625 2013;381(9868):752-762.
- 626 2. Zhao Y, Liu Q, Ji J. The prevalence of frailty in patients on hemodialysis: A systematic  
627 review and meta-analysis. *Int Urol Nephrol*. 2019:1-6.
- 628 3. Iyasere OU, Brown EA, Johansson L, et al. Quality of life and physical function in older  
629 patients on dialysis: A comparison of assisted peritoneal dialysis with hemodialysis. *Clin J*  
630 *Am Soc Nephrol*. 2016;11(3):423-430.
- 631 4. Johansen KL, Chertow GM, Jin C, et al. Significance of frailty among dialysis patients.  
632 *Journal of the American Society of Nephrology*. 2007;18(11):2960-2967.
- 633 5. López-Soto PJ, De Giorgi A, Senno E, et al. Renal disease and accidental falls: A review  
634 of published evidence. *BMC nephrology*. 2015;16(1):176.
- 635 6. Johansen KL, Dalrymple LS, Delgado C, et al. Factors associated with frailty and its  
636 trajectory among patients on hemodialysis. *Clinical Journal of the American Society of*  
637 *Nephrology*. 2017;12(7):1100-1108.
- 638 7. Wang CJ, Johansen KL. Are dialysis patients too frail to exercise? Seminars in  
639 dialysis.2019;32(4) 1-6.
- 640 8. Young HM, March DS, Graham-Brown MP, et al. Effects of intradialytic cycling exercise  
641 on exercise capacity, quality of life, physical function and cardiovascular measures in adult  
642 haemodialysis patients: A systematic review and meta-analysis. *Nephrology Dialysis*  
643 *Transplantation*. 2018; 33(8),1436-1445.

- 1  
2  
3 644 9. Brown EA. Can quality of life be improved for the increasing numbers of older patients  
4  
5 645 with end-stage kidney disease? *Expert review of pharmacoeconomics & outcomes research*.  
6  
7 646 2010;10(6):661-666.  
8  
9  
10  
11 647 10. Farrington K, Covic A, Nistor I, et al. Clinical practice guideline on management of older  
12  
13 648 patients with chronic kidney disease stage 3b or higher (eGFR < 45 mL/min/1.73 m<sup>2</sup>): A  
14  
15 649 summary document from the european renal best practice group. *Nephrology Dialysis*  
16  
17 650 *Transplantation*. 2017;32(1):9-16.  
18  
19  
20  
21 651 11. Graham-Brown M, March DS, Churchward DR, et al. Design and methods of CYCLE-  
22  
23 652 HD: Improving cardiovascular health in patients with end stage renal disease using a  
24  
25 653 structured programme of exercise: A randomised control trial. *BMC nephrology*.  
26  
27 654 2016;17(1):69.  
28  
29  
30  
31  
32 655 12. Charmaz K. Constructing grounded theory (introducing qualitative methods series). 2nd  
33  
34 656 edn. London: Sage Publications 2014.  
35  
36  
37  
38 657 13. Nixon AC, Bampouras TM, Pendleton N, et al. Diagnostic accuracy of frailty screening  
39  
40 658 methods in advanced chronic kidney disease. *Nephron*. 2019;141(3):147-155.  
41  
42  
43  
44 659 14. Rockwood K, Song X, MacKnight C, et al. A global clinical measure of fitness and frailty  
45  
46 660 in elderly people. *CMAJ*. 2005;173(5):489-495.  
47  
48  
49  
50 661 15. Alfaadhel TA, Soroka SD, Kiberd BA, et al. Frailty and mortality in dialysis: Evaluation  
51  
52 662 of a clinical frailty scale. *Clin J Am Soc Nephrol*. 2015;10(5):832-840.  
53  
54  
55  
56 663 16. Hoffmann TC, Glasziou PP, Boutron I, et al. Better reporting of interventions: Template  
57  
58 664 for intervention description and replication (TIDieR) checklist and guide. *BMJ*.  
59  
60 665 2014;348:g1687.



- 1  
2  
3 666 17. Borg GA. Psychophysical bases of perceived exertion. *Med Sci Sports Exerc.*  
4  
5 667 1982;14(5):377-381.  
6  
7  
8  
9 668 18. Sim J, Lewis M. The size of a pilot study for a clinical trial should be calculated in  
10  
11 669 relation to considerations of precision and efficiency. *J Clin Epidemiol.* 2012;65(3):301-308.  
12  
13  
14  
15 670 19. Young HML, Goodliffe S, Madhani M, et al. Co-producing progression criteria for  
16  
17 671 feasibility studies: A partnership between patient contributors, clinicians and researchers.  
18  
19 672 *International journal of environmental research and public health.* 2019;16(19):3756.  
20  
21  
22  
23 673 20. Avery KN, Williamson PR, Gamble C, et al. Informing efficient randomised controlled  
24  
25 674 trials: Exploration of challenges in developing progression criteria for internal pilot studies.  
26  
27 675 *BMJ open.* 2017;7(2):e013537.  
28  
29  
30  
31 676 21. Beddhu S, Bruns FJ, Saul M, et al. A simple comorbidity scale predicts clinical outcomes  
32  
33 677 and costs in dialysis patients. *Am J Med.* 2000;108(8):609-613.  
34  
35  
36  
37 678 22. Lamb SE, Jørstad-Stein EC, Hauer K, et al. Development of a common outcome data set  
38  
39 679 for fall injury prevention trials: The prevention of falls network europe consensus. *J Am*  
40  
41 680 *Geriatr Soc.* 2005;53(9):1618-1622.  
42  
43  
44  
45 681 23. Young HML, Orme MW, Song Y, et al. Standardising the measurement of physical  
46  
47 682 activity in people receiving haemodialysis: Considerations for research and practice. *BMC*  
48  
49 683 *nephrology.* 2019;20(1):450.  
50  
51  
52  
53 684 24. Eldridge SM, Chan CL, Campbell MJ, et al. CONSORT 2010 statement: Extension to  
54  
55 685 randomised pilot and feasibility trials. *Pilot and feasibility studies.* 2016;2(1):64.  
56  
57  
58  
59  
60

- 1  
2  
3 686 25. Richards DA, Bazeley P, Borglin G, et al. Integrating quantitative and qualitative data  
4  
5 687 and findings when undertaking randomised controlled trials. *BMJ open*. 2019;9(11).  
6  
7  
8  
9 688 26. Witham MD, Stott DJ. Conducting and reporting trials for older people. *Age Ageing*.  
10  
11 689 2017;46(6):889-894.  
12  
13  
14  
15 690 27. SONG initiative. Standardised outcomes in nephrology - haemodialysis.  
16  
17 691 <http://songinitiative.org/projects/song-hd/>. Updated 2017. Accessed July, 2019.  
18  
19  
20 692 28. Lamb SE, Keene DJ. Measuring physical capacity and performance in older people. *Best*  
21  
22 693 *Practice & Research Clinical Rheumatology*. 2017;31(2):243-254.  
23  
24  
25  
26 694 29. de Villar LO, Martínez-Olmos FJ, Junqué-Jiménez A, et al. Test-retest reliability and  
27  
28 695 minimal detectable change scores for the short physical performance battery, one-legged  
29  
30 696 standing test and timed up and go test in patients undergoing hemodialysis. *PloS one*.  
31  
32 697 2018;13(8):e0201035.  
33  
34  
35  
36 698 30. Akpan A, Roberts C, Bandeen-Roche K, et al. Standard set of health outcome measures  
37  
38 699 for older persons. *BMC geriatrics*. 2018;18(1):36.  
39  
40  
41  
42 700 31. Matsufuji S, Shoji T, Yano Y, et al. Effect of chair stand exercise on activity of daily  
43  
44 701 living: A randomized controlled trial in hemodialysis patients. *Journal of Renal Nutrition*.  
45  
46 702 2015;25(1):17-24.  
47  
48  
49  
50 703 32. Yates T, Gray LJ, Henson J, et al. Impact of depression and anxiety on change to physical  
51  
52 704 activity following a pragmatic diabetes prevention program within primary care: Pooled  
53  
54 705 analysis from two randomized controlled trials. *Diabetes Care*. 2019;42(10):1847-1853.  
55  
56  
57  
58  
59  
60

- 1  
2  
3 706 33. Zatloukal J, Houchen-Wolloff L, Ward S, et al. Clinical significance for ESWT in COPD  
4  
5 707 after a course of pulmonary rehabilitation. *Chro Respiratory*  
6  
7 708 *Disease*.2015;46.1479973119853828  
9  
10  
11 709 34. Carvalho LP, Kergoat M, Bolduc A, et al. A systematic approach for prescribing  
12  
13 710 posthospitalization home-based physical activity for mobility in older adults: The PATH  
14  
15 711 study. *Journal of the American Medical Directors Association*. 2019;20(10):1287-1293.  
17  
18  
19 712 35. Department of Health. Physical activity guidelines for older adults.  
20  
21 713 <https://www.nhs.uk/live-well/exercise/physical-activity-guidelines-older-adults/>. Updated  
22  
23 714 2019. Accessed April, 2020.  
25  
26  
27 715 36. Baggetta R, D'Arrigo G, Torino C, et al. Effect of a home based, low intensity, physical  
28  
29 716 exercise program in older adults dialysis patients: A secondary analysis of the EXCITE trial.  
30  
31 717 *BMC geriatrics*. 2018;18(1):248.  
33  
34  
35 718 37. Bohm C, Stewart K, Onyskie-Marcus J, Esliger D, et al. Effects of intradialytic cycling  
36  
37 719 compared with pedometry on physical function in chronic outpatient hemodialysis: A  
38  
39 720 prospective randomized trial. *Nephrology Dialysis Transplantation*. 2014;29(10):1947-1955.  
41  
42  
43 721 38. Sheshadri A, Kittiskulnam P, Lazar AA, et al. A walking intervention to increase weekly  
44  
45 722 steps in dialysis patients: A pilot randomized controlled trial. *American Journal of Kidney*  
46  
47 723 *Diseases*. 2020; 75(4):488-496  
49  
50  
51 724 39. de Labra C, Guimaraes-Pinheiro C, Maseda A, et al. Effects of physical exercise  
52  
53 725 interventions in frail older adults: A systematic review of randomized controlled trials. *BMC*  
54  
55 726 *geriatrics*. 2015;15(1):1.  
57  
58  
59  
60

- 1  
2  
3 727 40. Tawney KW, Tawney PJ, Hladik G, et al. The life readiness program: A physical  
4  
5 728 rehabilitation program for patients on hemodialysis. *American journal of kidney diseases*.  
6  
7 729 2000;36(3):581-591.  
8  
9  
10  
11 730 41. Bogataj Š, Pajek J, Ponikvar JB, et al. Kinesiologist-guided functional exercise in  
12  
13 731 addition to intradialytic cycling program in end-stage kidney disease patients: A randomised  
14  
15 732 controlled trial. *Scientific reports*. 2020;10(1):1-10.  
16  
17  
18  
19 733 42. Hofmeyer MR, Alexander NB, Nyquist LV, et al. Floor-Rise strategy training in older  
20  
21 734 adults. *J Am Geriatr Soc*. 2002;50(10):1702-1706.  
22  
23  
24  
25 735 43. Skelton DA, McLaughlin AW. Training functional ability in old age. *Physiotherapy*.  
26  
27 736 1996;82(3):159-167.  
28  
29  
30  
31 737 44. Giné-Garriga M, Roqué-Fíguls M, Coll-Planas L, et al. Physical exercise interventions for  
32  
33 738 improving performance-based measures of physical function in community-dwelling, frail  
34  
35 739 older adults: A systematic review and meta-analysis. *Arch Phys Med Rehabil*.  
36  
37 740 2014;95(4):753-769. e3.  
38  
39  
40  
41 741 45. Liu C, Shiroy DM, Jones LY, et al. Systematic review of functional training on muscle  
42  
43 742 strength, physical functioning, and activities of daily living in older adults. *European review*  
44  
45 743 *of aging and physical activity*. 2014;11(2):95.  
46  
47  
48  
49 744 46. Clarke AL, Jhamb M, Bennett P. Barriers and facilitators for engagement and  
50  
51 745 implementation of exercise in end-stage kidney disease: Future theory-based interventions  
52  
53 746 using the behavior change wheel. *Seminars in Dialysis*. 2019:1-12.  
54  
55  
56  
57 747 47. Michie S, Atkins L, West R. The behaviour change wheel. *A guide to designing*  
58  
59 748 *interventions*. 1st ed. Great Britain: Silverback Publishing. 2014:1003-1010.  
60

1  
2  
3 749 48. Wasmann KA, Wijsman P, van Dieren S, et al. Partially randomised patient preference  
4  
5 750 trials as an alternative design to randomised controlled trials: Systematic review and meta-  
6  
7 751 analyses. *BMJ open*. 2019;9(10):e031151.

10  
11 752 49. Craig P, Dieppe P, Macintyre S, et al. Developing and evaluating complex interventions:  
12  
13 753 The new medical research council guidance. *BMJ*. 2008;337:a1655.

15  
16  
17 754 50. Tracy SJ. Qualitative quality: Eight “big-tent” criteria for excellent qualitative research.  
18  
19 755 *Qualitative inquiry*. 2010;16(10):837-851.

21  
22  
23 756 Legends to Figures

24  
25  
26 757 Figure 1.CONSORT

27  
28  
29 758 Figure 2. The core components of an acceptable exercise programme for people living with  
30  
31 759 frailty and receiving haemodialysis.

32  
33  
34 760

35  
36  
37 761 **SUPPLEMENTARY MATERIAL**

38  
39  
40 762 Supplementary material 1. Inclusion and exclusion criteria for the CYCLE-HD trial

41  
42  
43 763 Supplementary material 2. Summary of intervention characteristics, in line with TiDier  
44  
45 764 guidance.

46  
47  
48 765 Supplementary material 3. *A priori* progression criteria based on the primary feasibility  
49  
50 766 objectives.

51  
52  
53 767 Supplementary material 4. Patient-reported secondary outcome measures.

54  
55  
56 768 Supplementary material 5. Interview topic guide questions.  
57  
58  
59  
60

- 1  
2  
3 769 Supplementary material 6. Falls summary data and incidence of falls per person years.  
4  
5 770 Supplementary material 7. Changes in exercise capacity and physical function after six  
6  
7 771 months.  
8  
9  
10 772 Supplementary material 8. Changes in physical activity (accelerometry data) after six months.  
11  
12  
13 773 Supplementary material 9. Patient-reported outcomes measures after six months.  
14  
15  
16 774 Supplementary material 10. Baseline demographic and clinical characteristics for the  
17  
18 775 qualitative participants.  
19  
20  
21 776 Supplementary material 11. Joint display of quantitative and qualitative results, with an  
22  
23 777 overall assessment of mixed-methods inferences.  
24  
25  
26  
27  
28  
29  
30  
31  
32  
33  
34  
35  
36  
37  
38  
39  
40  
41  
42  
43  
44  
45  
46  
47  
48  
49  
50  
51  
52  
53  
54  
55  
56  
57  
58  
59  
60

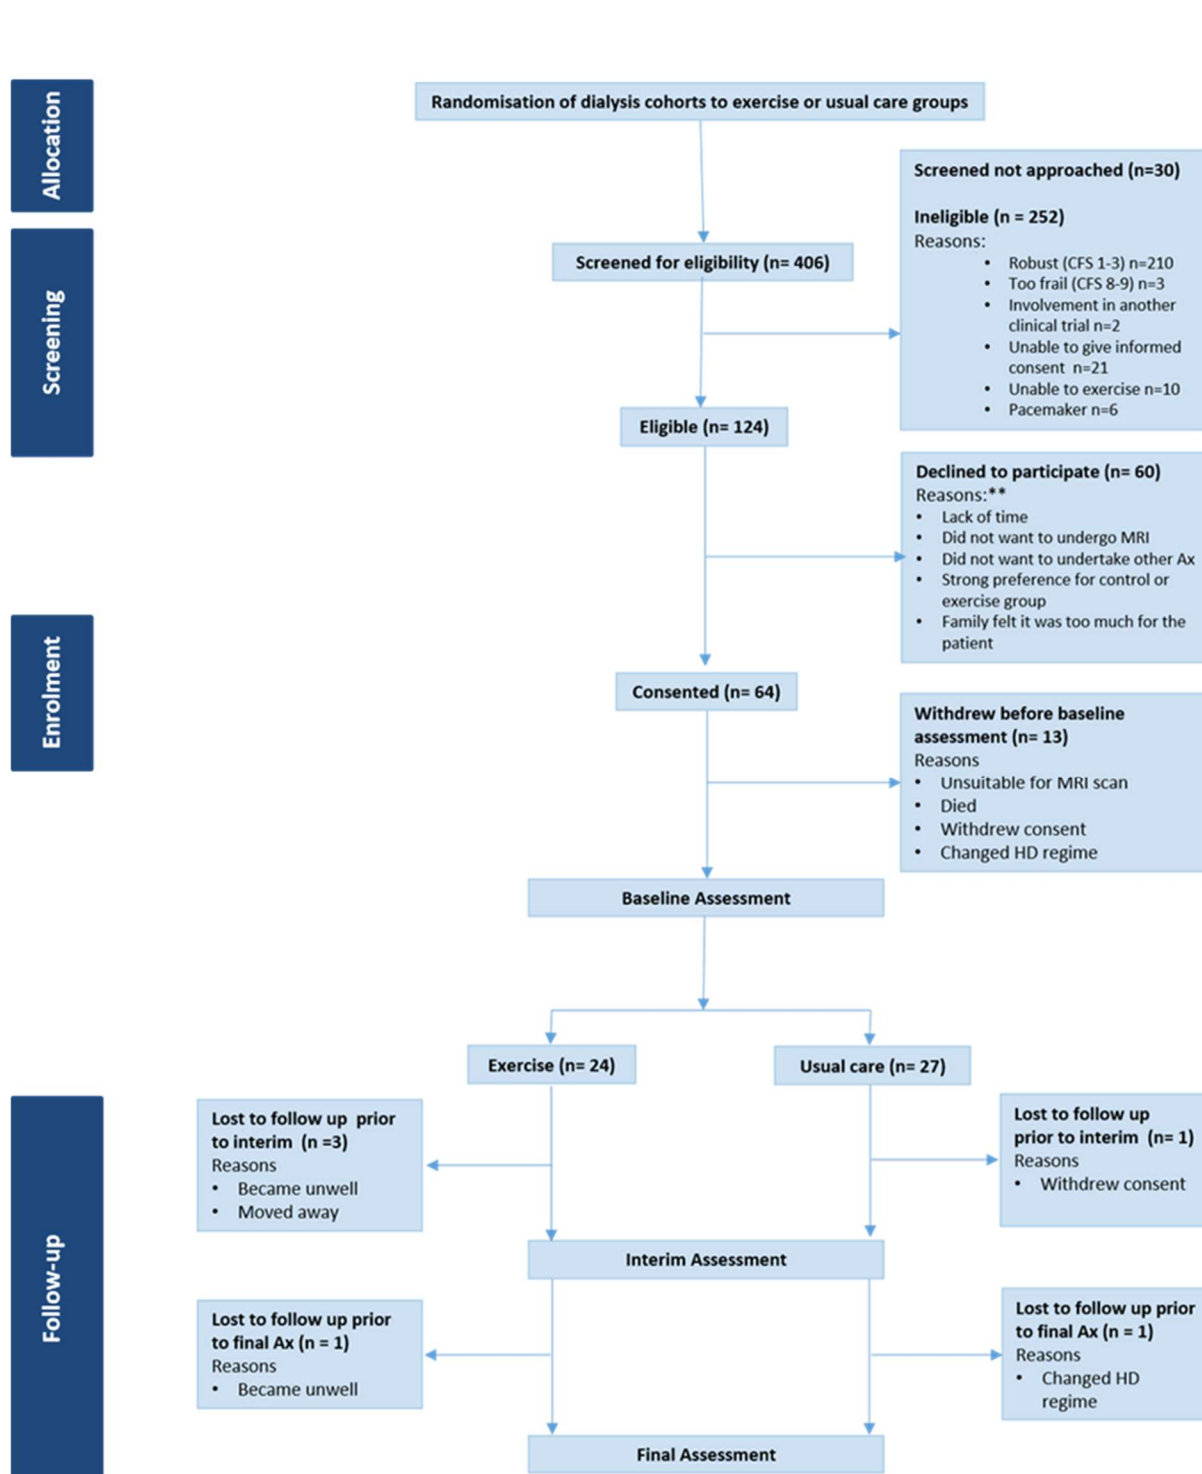

Abbreviations: Ax, assessment; CFS, Clinical Frailty Scale; HD, haemodialysis.

Supplementary material 1. Inclusion and exclusion criteria for the *CYCLE-HD* trial.

| Inclusion criteria                        | Exclusion criteria                                                                                      |
|-------------------------------------------|---------------------------------------------------------------------------------------------------------|
| Prevalent HD patient (> three months)     | Unable to participate in current exercise programme due to perceived physical or psychological barriers |
| Aged 18 years or older                    | Unable to undergo MRI scanning (metal implants, severe claustrophobia)                                  |
| Able and willing to give informed consent | Unfit to undertake exercise according to the American College of Sports Medicine (ACSM) guidelines      |



Supplementary material 2. Summary of intervention characteristics, in line with TiDier guidance.

|                                      |                                                                              |                                                                                                                                                                                                                                                                                                                                                                                                                                                     |
|--------------------------------------|------------------------------------------------------------------------------|-----------------------------------------------------------------------------------------------------------------------------------------------------------------------------------------------------------------------------------------------------------------------------------------------------------------------------------------------------------------------------------------------------------------------------------------------------|
| <b>Description of intervention.</b>  |                                                                              | A structured, supervised cycling exercise intervention delivered during in-centre HD.                                                                                                                                                                                                                                                                                                                                                               |
| <b>Rationale.</b>                    |                                                                              | <ul style="list-style-type: none"> <li>Intradialytic cycling provides aerobic and low-level resistance training, is associated with increased adherence and is most widely used within practice.</li> </ul>                                                                                                                                                                                                                                         |
| <b>What.</b>                         | Materials provided to participants or used to support intervention delivery. | <ul style="list-style-type: none"> <li>Cycling was delivered using the Moto Med Letto 2 (Medimotion Ltd).</li> <li>Materials: individualised exercise prescription and records of individual training bouts (duration (mins), intensity (RPE), resistance (gear), power output (watts) and energy expenditure (Kcal).</li> <li>General information on the benefits of exercise (posters and leaflets) available across all 3 HD centres.</li> </ul> |
|                                      | Materials used to train intervention providers.                              | Standardised progression and training protocol used by all providers.                                                                                                                                                                                                                                                                                                                                                                               |
| <b>Who</b> (intervention providers). |                                                                              | <ul style="list-style-type: none"> <li>Qualified exercise professionals with experience of delivering exercise to renal patients.</li> <li>All providers were directly involved in the study, and not delivering the sessions as part of a clinical role.</li> <li>Roles included exercise provision, supervision, monitoring and progression.</li> </ul>                                                                                           |
| <b>How</b> (mode of delivery).       |                                                                              | One to one, face to face.                                                                                                                                                                                                                                                                                                                                                                                                                           |
| <b>Where</b> (location).             |                                                                              | Three HD units across the East Midlands, UK.                                                                                                                                                                                                                                                                                                                                                                                                        |
| <b>When and how much</b>             | The frequency of delivery.                                                   | Thrice weekly during each dialysis session.                                                                                                                                                                                                                                                                                                                                                                                                         |
|                                      | Target intensity of each bout of exercise.                                   | RPE 12-14 (moderate intensity), cadence 60-70 RPM.                                                                                                                                                                                                                                                                                                                                                                                                  |
|                                      | Target duration of each bout of exercise.                                    | At least 30 minutes of continuous exercise.                                                                                                                                                                                                                                                                                                                                                                                                         |
|                                      | The total duration of delivery.                                              | Six months, with a one-month run-in period to achieve the target exercise prescription.                                                                                                                                                                                                                                                                                                                                                             |
| <b>Tailoring.</b>                    |                                                                              | <ul style="list-style-type: none"> <li>The starting resistance (gear) based on the individual's tolerance.</li> <li>RPE used throughout to monitor and progress the exercise.</li> <li>Interval training was permitted.</li> </ul>                                                                                                                                                                                                                  |

Abbreviations: HD, haemodialysis; Kcal, kilocalories; RPE, rating of perceived exertion, RPM, revolutions per minute.

Supplementary material 3. A priori progression criteria based on the primary feasibility objectives.

|                               |             |                                                         |
|-------------------------------|-------------|---------------------------------------------------------|
| <b>Eligibility</b>            | <b>Stop</b> | Less than <b>20%</b> of all patients eligible           |
|                               | <b>Go</b>   | More than <b>50%</b> of all patients eligible           |
| <b>Recruitment</b>            | <b>Stop</b> | Less than <b>25%</b> of eligible patients recruited     |
|                               | <b>Go</b>   | More than <b>50%</b> of eligible patients recruited     |
| <b>Exercise acceptability</b> | <b>Stop</b> | Less than <b>30%</b> adherence to the exercise sessions |
|                               | <b>Go</b>   | More than <b>70%</b> adherence to the exercise sessions |
| <b>Outcome acceptability</b>  | <b>Stop</b> | Less than <b>70%</b> outcome measure completion         |
|                               | <b>Go</b>   | More than <b>80%</b> outcome measure completion         |
| <b>Loss to follow-up</b>      | <b>Stop</b> | More than <b>40%</b> loss to follow-up                  |
|                               | <b>Go</b>   | Less than <b>20%</b> loss to follow-up                  |

Supplementary material 4. Patient-reported secondary outcome measures.

| Patient-reported secondary outcome                                        | Construct measured                                                                                                                                                                                                                                                            |
|---------------------------------------------------------------------------|-------------------------------------------------------------------------------------------------------------------------------------------------------------------------------------------------------------------------------------------------------------------------------|
| 12-item Short-Form Health Survey Version 2 (SF-12)                        | Generic health-related quality of life. Higher scores reflect better HRQoL. Scores are presented as a mental and physical component summary score.                                                                                                                            |
| Palliative care Outcomes Scale – Renal version (POS-R)                    | Renal specific measure of symptomology and symptom burden. A global symptom score was calculated by totalling all the scored items within the questionnaire. The mean number of symptoms, symptom severity was also calculated. Higher scores reflect greater symptom burden. |
| Hospital Anxiety and Depression Scale (HADS)                              | Emotional distress. A score of $\geq 14$ indicates the presence of emotional distress in HD patients                                                                                                                                                                          |
| The Exercise Self-Efficacy Scale (ESES)                                   | Exercise confidence. Higher scores reflecting greater self-efficacy.                                                                                                                                                                                                          |
| Dialysis Patient-Perceived Exercise Benefits and Barriers Scale (DPPEBBS) | HD patients' perceptions of benefits and barriers to exercise. Higher scores indicate a greater perception of the benefits of exercise over barriers.                                                                                                                         |
| The Dukes Activity Status Index (DASI)                                    | Self-reported physical function. Higher scores indicate higher levels of physical function. The questionnaire was also used to estimate $VO_2$ peak.                                                                                                                          |

HD, haemodialysis; HRQoL, Health-related quality of life.

1  
2  
3 *Supplementary material 5. Interview topic guide question.*  
4

5 Diary  
6  
7  
8

- 9 1. Can you tell me about how you have been using the diary?  
10  
11 2. If we asked patients to keep diaries like yours as part of a future study, what might help  
12 them?  
13  
14 3. [If applicable] I've had an opportunity to have a look through your diary. Could you tell  
15 me more about...?  
16

17  
18  
19 Exercise intervention for frailty and falls  
20

- 21  
22  
23 4. For some people exercising helps to prevent falls, make people more able and feel better.  
24 How do you feel about exercising?  
25  
26 5. Cycling during dialysis is thought to be a good way to exercise if you are on dialysis. Have  
27 you seen these bikes?  
28  
29 6. Programmes that are available for other people who fall include things like group exercise  
30 and education. What do you think about this?  
31  
32 7. These programmes usually take place at the hospital. What do you think about this?  
33  
34 8. Some people prefer to do their exercise at home. What do you think about this?  
35  
36 9. Where do you think a programme should be run?  
37  
38 10. How often do you think you would be able to exercise?  
39  
40 11. Would you want any support to help you exercise?  
41  
42 12. What might put you off exercising?  
43  
44 13. What questions might you have before you decide to take part or not?  
45  
46 14. If you did take part in some kind of exercise programme, what improvements would you  
47 most like to see?  
48  
49

50  
51 Research  
52

- 53 15. Have you ever been involved in research before? [Could tailor to involvement in CYCLE  
54 study (declined/ took part. If took part completed/dropped out) if patient unsure]  
55  
56 16. What do you think about the information you receive when deciding to take part in a  
57 research study?  
58  
59  
60

1  
2  
3 17. Often researchers ask you to complete some assessments or tests to see if the thing they  
4 are studying is effective or not. What do you think would help patients to complete these  
5 assessments/ tests?  
6

7  
8 18. Sometimes people don't complete the research study, which may happen for several  
9 reasons [give examples as needed]. What do you think would help keep dialysis from  
10 dropping out of research studies?  
11

12 19. What would you like to happen once you reach the end of the study?  
13  
14  
15  
16  
17  
18  
19  
20  
21  
22  
23  
24  
25  
26  
27  
28  
29  
30  
31  
32  
33  
34  
35  
36  
37  
38  
39  
40  
41  
42  
43  
44  
45  
46  
47  
48  
49  
50  
51  
52  
53  
54  
55  
56  
57  
58  
59  
60

For peer review only

Supplementary material 6. Falls summary data and incidence of falls per person years.

|                                                                         | <b>Usual care</b><br>(n=27) | <b>Exercise</b><br>(n=24) |
|-------------------------------------------------------------------------|-----------------------------|---------------------------|
| <b>Number of Falls</b>                                                  | 11                          | 5                         |
| <b>Number (% of group) of non-fallers</b>                               | 19 (70)                     | 20 (83)                   |
| <b>Number (% of group) fallers (<math>\geq 1</math> fall)</b>           | 8 (30)                      | 4 (17)                    |
| <b>Number (% of group) frequent fallers (<math>\geq 2</math> falls)</b> | 3 (11)                      | 1 (4)                     |
| <b>Person years</b>                                                     | 40.5                        | 36                        |
| <b>Incidence rate</b>                                                   | 0.27                        | 0.14                      |

For peer review only

Supplementary material 7. Changes in exercise capacity and physical function after six months.

|             | Outcome             |          | Usual Care  | Exercise     | Difference (95% CI)  |
|-------------|---------------------|----------|-------------|--------------|----------------------|
| ISWT (m)    |                     | n        | 16          | 15           | 36 (-12 to 84)       |
|             |                     | Baseline | 184 ± 130   | 237 ± 173    |                      |
|             |                     | Final    | 158 ± 154   | 248 ± 192    |                      |
|             |                     | Change   | -26 ± 68    | 11 ± 63      |                      |
| ESWT (secs) |                     | n        | 14          | 15           | 181 (-92 to 453)     |
|             |                     | Baseline | 347 ± 384   | 401 ± 375    |                      |
|             |                     | Final    | 193 ± 304   | 428 ± 423    |                      |
|             |                     | Change   | -153 ± 286  | 27 ± 413     |                      |
| STS60 (n)   |                     | n        | 17          | 15           | 0 (-5 to 4)          |
|             |                     | Baseline | 10 ± 12     | 13 ± 11      |                      |
|             |                     | Final    | 10 ± 13     | 13 ± 12      |                      |
|             |                     | Change   | 0 ± 7       | 0 ± 6        |                      |
| SPPB        | Total score         | n        | 17          | 15           | 0.5 (-0.7 to 2)      |
|             |                     | Baseline | 7 ± 3       | 9 ± 3        |                      |
|             |                     | Final    | 6 ± 2       | 8 ± 3        |                      |
|             |                     | Change   | -1 ± 2      | -0.5 ± 1     |                      |
|             | 4m walk time (secs) | n        | 17          | 15           | 1 (-1 to 4)          |
|             |                     | Baseline | 7 ± 6       | 4 ± 1        |                      |
|             |                     | Final    | 6 ± 4       | 5 ± 2        |                      |
|             |                     | Change   | 1 ± 5       | 0 ± 1        |                      |
|             | Gait speed (m/s)    | n        | 17          | 15           | 0.05 (-0.12 to 0.22) |
|             |                     | Baseline | 0.74 ± 0.29 | 0.96 ± 0.28  |                      |
|             |                     | Final    | 0.74 ± 0.28 | 0.91 ± 0.31  |                      |
|             |                     | Change   | 0.00 ± 0.22 | -0.05 ± 0.24 |                      |
|             | STS5 (secs)         | n        | 9           | 10           | 5 (-4 to 15)         |
|             |                     | Baseline | 17 ± 7      | 16 ± 14      |                      |
|             |                     | Final    | 23 ± 13     | 16 ± 10      |                      |
|             |                     | Change   | 6 ± 11      | 0 ± 8        |                      |

Abbreviations: CI, confidence interval; ESWT, Endurance Shuttle Walk Test; ISWT, Incremental Shuttle Walk Test; m/s, metres per second; Secs, seconds; SPPB, Short Physical Performance Battery; STS5, Sit to Stand Five Repetitions; STS60, Sit to Stand in Sixty Seconds.

Supplementary material 8. Changes in physical activity (accelerometry data) after six months.

|                         | Type of day |          | Usual Care  | Exercise    | Difference (95% CI) |
|-------------------------|-------------|----------|-------------|-------------|---------------------|
| Waking wear time (mins) | HD          | n        | 5           | 10          | 244 (16 to 473)     |
|                         |             | Baseline | 891 ± 202   | 818 ± 183   |                     |
|                         |             | Final    | 749 ± 105   | 921 ± 171   |                     |
|                         |             | Change   | -142 ± 166  | 103 ± 204   |                     |
|                         | Non-HD      | n        | 5           | 10          | 170 (-13 to 353)    |
|                         |             | Baseline | 893 ± 90    | 927 ± 216   |                     |
|                         |             | Final    | 817 ± 134   | 1022 ± 165  |                     |
|                         |             | Change   | -75 ± 201   | 95 ± 129    |                     |
| Steps (steps/day)       | HD          | n        | 5           | 10          | 859 (-825 to 2543)  |
|                         |             | Baseline | 2252 ± 4210 | 1373 ± 1080 |                     |
|                         |             | Final    | 2464 ± 4783 | 2444 ± 1904 |                     |
|                         |             | Change   | 211 ± 593   | 1070 ± 1665 |                     |
|                         | Non-HD      | n        | 5           | 10          | 888 (-84 to 1861)   |
|                         |             | Baseline | 3076 ± 5790 | 2387 ± 1696 |                     |
|                         |             | Final    | 2645 ± 5284 | 2845 ± 2117 |                     |
|                         |             | Change   | -430 ± 603  | 458 ± 903   |                     |
| Sedentary (mins/day)    | HD          | n        | 5           | 10          | 28 (-284 to 340)    |
|                         |             | Baseline | 954 ± 338   | 954 ± 203   |                     |
|                         |             | Final    | 965 ± 208   | 992 ± 182   |                     |
|                         |             | Change   | 10 ± 200    | 38 ± 287    |                     |
|                         | Non-HD      | n        | 5           | 10          | 124 (-205 to 454)   |
|                         |             | Baseline | 1022 ± 357  | 1103 ± 253  |                     |
|                         |             | Final    | 912 ± 224   | 1117 ± 174  |                     |
|                         |             | Change   | -110 ± 298  | 14 ± 269    |                     |
| Light PA (mins/day)     | HD          | n        | 5           | 10          | 91 (23 to -158)     |
|                         |             | Baseline | 125 ± 51    | 83 ± 42     |                     |
|                         |             | Final    | 79 ± 39     | 127 ± 73    |                     |
|                         |             | Change   | -46 ± 45    | 44 ± 62     |                     |
|                         | Non-HD      | n        | 5           | 10          | 9 (-71 to 91)       |
|                         |             | Baseline | 145 ± 59    | 133 ± 50    |                     |
|                         |             | Final    | 154 ± 99    | 151 ± 59    |                     |
|                         |             | Change   | 9 ± 108     | 18 ± 44     |                     |
| Moderate PA (mins/day)  | HD          | n        | 5           | 10          | 13 (-32 to 57)      |
|                         |             | Baseline | 83 ± 105    | 29 ± 33     |                     |
|                         |             | Final    | 85 ± 123    | 43 ± 55     |                     |
|                         |             | Change   | 1 ± 52      | 14 ± 29     |                     |
|                         | Non-HD      | n        | 5           | 10          | 20 (40 to -79)      |
|                         |             | Baseline | 79 ± 96     | 46 ± 61     |                     |
|                         |             | Final    | 75 ± 112    | 62 ± 105    |                     |
|                         |             | Change   | -4 ± 40     | 16 ± 55     |                     |
| Vigorous PA (mins/day)  | HD          | n        | 5           | 10          | 3 (-1 to 8)         |
|                         |             | Baseline | 4 ± 9       | 1 ± 1       |                     |
|                         |             | Final    | 1 ± 2       | 1 ± 3       |                     |
|                         |             | Change   | -3 ± 7      | 0 ± 2       |                     |
|                         | Non-HD      | n        | 5           | 10          | 1 (0 to 2)          |
|                         |             | Baseline | 3 ± 0       | 1 ± 4       |                     |
|                         |             | Final    | 2 ± 5       | 1 ± 4       |                     |
|                         |             | Change   | -1 ± 2      | 0 ± 0       |                     |

Abbreviations: CI, confidence interval; HD, haemodialysis; mins, minutes; PA, physical activity.



## Supplementary material 9. Patient-reported outcomes measures after six months.

|         | Outcome               |               | Usual Care    | Exercise              | Difference (95% CI) |
|---------|-----------------------|---------------|---------------|-----------------------|---------------------|
| SF-12   | PCS                   | n             | 19            | 19                    | 0 (-4 to 5)         |
|         |                       | Baseline      | 35 ± 9        | 35 ± 10               |                     |
|         |                       | Final         | 36 ± 10       | 36 ± 10               |                     |
|         |                       | Change        | 1 ± 7         | 1 ± 7                 |                     |
|         | MCS                   | n             | 19            | 19                    | 4 (-3 to 10)        |
|         |                       | Baseline      | 43 ± 15       | 45 ± 13               |                     |
|         |                       | Final         | 46 ± 13       | 45 ± 13               |                     |
|         |                       | Change        | 4 ± 7         | 0 ± 12                |                     |
| HADS    | n                     | 20            | 17            | 0 (-3 to 4)           |                     |
|         | Baseline              | 16 ± 10       | 15 ± 9        |                       |                     |
|         | Final                 | 14 ± 10       | 13 ± 9        |                       |                     |
|         | Change                | -2 ± 5        | -2 ± 6        |                       |                     |
| POS-R   | Global severity score | n             | 20            | 18                    | 2 (-3 to 7)         |
|         |                       | Baseline      | 19 ± 14       | 19 ± 14               |                     |
|         |                       | Final         | 18 ± 14       | 20 ± 14               |                     |
|         |                       | Change        | 1 ± 6         | -1 ± 9                |                     |
|         | mean severity         | n             | 20            | 18                    | 0 (0 to 0)          |
|         |                       | Baseline      | 2 ± 1         | 2 ± 1                 |                     |
|         |                       | Final         | 2 ± 1         | 2 ± 1                 |                     |
|         |                       | Change        | 0 ± 0         | 0 ± 0                 |                     |
|         | mean number           | n             | 22            | 16                    | 0 (-1 to 2)         |
|         |                       | Baseline      | 9 ± 4         | 10 ± 4                |                     |
|         |                       | Final         | 9 ± 4         | 10 ± 5                |                     |
|         |                       | Change        | 0 ± 4         | 0 ± 2                 |                     |
| ESES    | n                     | 19            | 16            | 0 (-1 to 1)           |                     |
|         | Baseline              | 2 ± 2         | 2 ± 1         |                       |                     |
|         | Final                 | 2 ± 1         | 2 ± 1         |                       |                     |
|         | Change                | 0 ± 1         | 0 ± 1         |                       |                     |
| DPPEBBS | n                     | 19            | 15            | 3 (-4 to 11)          |                     |
|         | Baseline              | 59 ± 10       | 59 ± 15       |                       |                     |
|         | Final                 | 61 ± 10       | 65 ± 7        |                       |                     |
|         | Change                | 2 ± 7         | 6 ± 14        |                       |                     |
| DASI    | n                     | 20            | 18            | 4.93 (-0.94 to 10.80) |                     |
|         | Baseline              | 13.06 ± 12.85 | 20.29 ± 14.33 |                       |                     |
|         | Final                 | 17.29 ± 14.41 | 19.60 ± 14.59 |                       |                     |
|         | Change                | 4.22 ± 9.72   | -0.71 ± 7.92  |                       |                     |

Abbreviations: CI, confidence interval; DASI, Duke Activity Status Index; DPPEBBS, Dialysis Patients Benefits and Barriers Scale; ESES, Exercise Self efficacy Scale; HADS, Hospital Anxiety and Depression Scale; MCS, mental component summary score; POS-R, Palliative Outcomes Scale Renal, PCS, physical component summary score; VAS, visual analogue scale.

Supplementary material 10. Baseline demographic and clinical characteristics for the qualitative participants.

|                                               | <b>N=25</b>                        |          |
|-----------------------------------------------|------------------------------------|----------|
| <b>Age (years)</b>                            | 69±10                              |          |
| <b>Gender n (%)</b>                           | Female                             | 13 (52%) |
|                                               | Male                               | 12 (48%) |
| <b>Ethnicity n (%)</b>                        | White background                   | 13 (52%) |
|                                               | Asian or Asian British             | 10 (40%) |
|                                               | Caribbean                          | 1 (4%)   |
|                                               | Not stated                         | 1 (4%)   |
| <b>Diagnosis</b>                              | Diabetic nephropathy               | 11 (44%) |
|                                               | Aetiology uncertain                | 6 (24%)  |
|                                               | Chronic pyelonephritis             | 3 (12%)  |
|                                               | Atypical hemolytic uremic syndrome | 1 (4%)   |
|                                               | FSGS                               | 1 (4%)   |
|                                               | Henoch-Schönlein Purpura           | 1 (4%)   |
|                                               | Minimal change nephropathy         | 1 (4%)   |
|                                               | Polycystic kidney disease          | 1 (4%)   |
| <b>CCI</b>                                    | 6±2                                |          |
| <b>Time on HD (months)</b>                    | 43 (IQR 16-85)                     |          |
| <b>CFS n (%)</b>                              | Vulnerable                         | 9 (36%)  |
|                                               | Mildly frail                       | 5 (20%)  |
|                                               | Moderately frail                   | 8 (32%)  |
|                                               | Severely frail                     | 3 (12%)  |
| <b>Number of falls in the last six months</b> | 3 (IQR 2-4)                        |          |
| <b>Previous transplant n (%)</b>              | No                                 | 21 (84%) |
|                                               | Yes                                | 4 (16%)  |
| <b>Active on transplant list n (%)</b>        | No                                 | 22 (88%) |
|                                               | Yes                                | 3 (12%)  |

Abbreviations: CCI, Charlson comorbidity index; CFS, clinical frailty scale; FSGS, Focal segmental glomerulosclerosis; HD, haemodialysis.

Supplementary material 11. Joint display of quantitative and qualitative results, with an overall assessment of mixed-methods inferences.

|                     | Progression criteria                                              | Feasibility trial                                                                            | Qualitative results                                                                                                                                                                                                                                                                                                                                                                                                    | Mixed-methods inferences                        |
|---------------------|-------------------------------------------------------------------|----------------------------------------------------------------------------------------------|------------------------------------------------------------------------------------------------------------------------------------------------------------------------------------------------------------------------------------------------------------------------------------------------------------------------------------------------------------------------------------------------------------------------|-------------------------------------------------|
| <b>Eligibility</b>  | <b>STOP</b> <20%<br><b>GO</b> >50%<br>eligible.                   | 31% patients eligible                                                                        | No discussion. Patients not involved in screening process                                                                                                                                                                                                                                                                                                                                                              | Silence                                         |
| <b>Recruitment</b>  | <b>STOP</b> <25%<br><b>GO</b> >50%<br>recruited.                  | 52% eligible patients recruited.                                                             | <ul style="list-style-type: none"> <li>- Frailer and female participants less likely to be approached despite eligibility and have more concerns about the suitability</li> <li>- Perception that risks outweigh the potential benefit</li> <li>- Recruitment processes could be improved</li> </ul>                                                                                                                   | Complementary                                   |
| <b>Retention</b>    | <b>STOP</b> >40%<br><b>GO</b> <20%<br>lost to follow-up.          | 12 % loss to follow-up.<br>Reasons predominantly unavoidable (death, ill-health).            | Loss to follow-up attributed to: <ul style="list-style-type: none"> <li>- Illness;</li> <li>- length of trial;</li> <li>- the reality of being in the study not meeting expectations.</li> </ul>                                                                                                                                                                                                                       | Complementary                                   |
| <b>Intervention</b> | <b>STOP</b> <30%<br><b>GO</b> >70%<br>adherence over six-months.  | 74% adherence rate across the six-month exercise duration.                                   | <ul style="list-style-type: none"> <li>- IDC good use of time.</li> <li>- Participants felt safe and felt well supported.</li> <li>- IDC limited in scope.</li> <li>- Participants described a range of other important components</li> </ul>                                                                                                                                                                          | Complementary                                   |
| <b>Outcome</b>      | <b>STOP</b> <70%<br><b>GO</b> >80%<br>outcome measure completion. | Up to 89% of secondary outcome measure data missing<br>Collection of falls data challenging. | <ul style="list-style-type: none"> <li>- Number of outcomes measured to be reduced.</li> <li>- Outcome testing during HD or at home preferred.</li> <li>- 52% agreed to complete a falls diary, 12% lost.</li> <li>- STS60, ESWT and ISWT unsuitable</li> <li>- Researcher support and family involvement may increase completion</li> <li>- Outcomes measuring ADLs, participation and symptom prioritised</li> </ul> | Complementary<br><br>Silence for PA monitoring. |

Results from the feasibility trial are colour coded to depict whether they met the 'stop' (red), 'go' (green) or 'change' (orange) progression criteria.

Abbreviations: ADLs, activities of daily living; ESWT, Endurance Shuttle Walk Test; IDC, intradialytic exercise; ISWT, Incremental Shuttle Walk Test; PA, physical activity; STS60, sit to stand in sixty seconds.

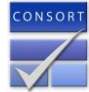

## CONSORT 2010 checklist of information to include when reporting a pilot or feasibility trial\*

| Section/Topic             | Item No | Checklist item                                                                                                                                               | Reported on page No                     |
|---------------------------|---------|--------------------------------------------------------------------------------------------------------------------------------------------------------------|-----------------------------------------|
| <b>Title and abstract</b> |         |                                                                                                                                                              |                                         |
|                           | 1a      | Identification as a pilot or feasibility randomised trial in the title                                                                                       | 1                                       |
|                           | 1b      | Structured summary of pilot trial design, methods, results, and conclusions (for specific guidance see CONSORT abstract extension for pilot trials)          | 3-4                                     |
| <b>Introduction</b>       |         |                                                                                                                                                              |                                         |
| Background and objectives | 2a      | Scientific background and explanation of rationale for future definitive trial, and reasons for randomised pilot trial                                       | 6                                       |
|                           | 2b      | Specific objectives or research questions for pilot trial                                                                                                    | 6-7                                     |
| <b>Methods</b>            |         |                                                                                                                                                              |                                         |
| Trial design              | 3a      | Description of pilot trial design (such as parallel, factorial) including allocation ratio                                                                   | 7-8                                     |
|                           | 3b      | Important changes to methods after pilot trial commencement (such as eligibility criteria), with reasons                                                     | n/a                                     |
| Participants              | 4a      | Eligibility criteria for participants                                                                                                                        | 7 and supplementary material 1          |
|                           | 4b      | Settings and locations where the data were collected                                                                                                         | 7-8,10-11                               |
|                           | 4c      | How participants were identified and consented                                                                                                               | 8                                       |
| Interventions             | 5       | The interventions for each group with sufficient details to allow replication, including how and when they were actually administered                        | 8 and supplementary material 2          |
| Outcomes                  | 6a      | Completely defined prespecified assessments or measurements to address each pilot trial objective specified in 2b, including how and when they were assessed | 9-11, supplementary materials 3,4 and 5 |
|                           | 6b      | Any changes to pilot trial assessments or measurements after the pilot trial commenced, with reasons                                                         | n/a                                     |
|                           | 6c      | If applicable, prespecified criteria used to judge whether, or how, to proceed with future definitive trial                                                  | 9 and supplementary material 3          |
| Sample size               | 7a      | Rationale for numbers in the pilot trial                                                                                                                     | 8-9                                     |

|                                                      |     |                                                                                                                                                                                             |                                                         |
|------------------------------------------------------|-----|---------------------------------------------------------------------------------------------------------------------------------------------------------------------------------------------|---------------------------------------------------------|
|                                                      | 7b  | When applicable, explanation of any interim analyses and stopping guidelines                                                                                                                | 9                                                       |
| Randomisation:                                       |     |                                                                                                                                                                                             |                                                         |
| Sequence generation                                  | 8a  | Method used to generate the random allocation sequence                                                                                                                                      | 8                                                       |
|                                                      | 8b  | Type of randomisation(s); details of any restriction (such as blocking and block size)                                                                                                      | 8                                                       |
| Allocation concealment mechanism                     | 9   | Mechanism used to implement the random allocation sequence (such as sequentially numbered containers), describing any steps taken to conceal the sequence until interventions were assigned | 8                                                       |
| Implementation                                       | 10  | Who generated the random allocation sequence, who enrolled participants, and who assigned participants to interventions                                                                     | 8                                                       |
| Blinding                                             | 11a | If done, who was blinded after assignment to interventions (for example, participants, care providers, those assessing outcomes) and how                                                    | 9                                                       |
|                                                      | 11b | If relevant, description of the similarity of interventions                                                                                                                                 | n/a                                                     |
| Statistical methods                                  | 12  | Methods used to address each pilot trial objective whether qualitative or quantitative                                                                                                      | 11                                                      |
| <b>Results</b>                                       |     |                                                                                                                                                                                             |                                                         |
| Participant flow (a diagram is strongly recommended) | 13a | For each group, the numbers of participants who were approached and/or assessed for eligibility, randomly assigned, received intended treatment, and were assessed for each objective       | 12-13 figure 1                                          |
|                                                      | 13b | For each group, losses and exclusions after randomisation, together with reasons                                                                                                            | 12-13 figure 1                                          |
| Recruitment                                          | 14a | Dates defining the periods of recruitment and follow-up                                                                                                                                     | 12                                                      |
|                                                      | 14b | Why the pilot trial ended or was stopped                                                                                                                                                    | n/a                                                     |
| Baseline data                                        | 15  | A table showing baseline demographic and clinical characteristics for each group                                                                                                            | Table 1 (trial) supplementary material 10 (qualitative) |
| Numbers analysed                                     | 16  | For each objective, number of participants (denominator) included in each analysis. If relevant, these numbers should be by randomised group                                                | Supplementary materials 6-9 and page 15-17              |
| Outcomes and estimation                              | 17  | For each objective, results including expressions of uncertainty (such as 95% confidence interval) for any estimates. If relevant, these results should be by randomised group              | Supplementary materials 6-9 and page 15-17              |
| Ancillary analyses                                   | 18  | Results of any other analyses performed that could be used to inform the future definitive trial                                                                                            | 17- 26                                                  |
| Harms                                                | 19  | All important harms or unintended effects in each group (for specific guidance see CONSORT for harms)                                                                                       | P 17                                                    |
|                                                      | 19a | If relevant, other important unintended consequences                                                                                                                                        | n/a                                                     |
| <b>Discussion</b>                                    |     |                                                                                                                                                                                             |                                                         |

|   |                          |     |                                                                                                                                                     |         |
|---|--------------------------|-----|-----------------------------------------------------------------------------------------------------------------------------------------------------|---------|
| 1 | Limitations              | 20  | Pilot trial limitations, addressing sources of potential bias and remaining uncertainty about feasibility                                           | 30      |
| 2 | Generalisability         | 21  | Generalisability (applicability) of pilot trial methods and findings to future definitive trial and other studies                                   | 26-31   |
| 3 | Interpretation           | 22  | Interpretation consistent with pilot trial objectives and findings, balancing potential benefits and harms, and considering other relevant evidence | 26-31   |
| 4 |                          | 22a | Implications for progression from pilot to future definitive trial, including any proposed amendments                                               | 26-31   |
| 5 | <b>Other information</b> |     |                                                                                                                                                     |         |
| 6 | Registration             | 23  | Registration number for pilot trial and name of trial registry                                                                                      | 4 and 7 |
| 7 | Protocol                 | 24  | Where the pilot trial protocol can be accessed, if available                                                                                        | 7       |
| 8 | Funding                  | 25  | Sources of funding and other support (such as supply of drugs), role of funders                                                                     | 31      |
| 9 |                          | 26  | Ethical approval or approval by research review committee, confirmed with reference number                                                          | 32      |

10  
11  
12  
13  
14  
15 Citation: Eldridge SM, Chan CL, Campbell MJ, Bond CM, Hopewell S, Thabane L, et al. CONSORT 2010 statement: extension to randomised pilot and feasibility trials. *BMJ*. 2016;355.

16 \*We strongly recommend reading this statement in conjunction with the CONSORT 2010, extension to randomised pilot and feasibility trials, Explanation and Elaboration for important  
17 clarifications on all the items. If relevant, we also recommend reading CONSORT extensions for cluster randomised trials, non-inferiority and equivalence trials, non-pharmacological  
18 treatments, herbal interventions, and pragmatic trials. Additional extensions are forthcoming: for those and for up to date references relevant to this checklist, see [www.consort-statement.org](http://www.consort-statement.org).  
19  
20  
21  
22  
23  
24  
25  
26  
27  
28  
29  
30  
31  
32  
33  
34  
35  
36  
37  
38  
39  
40  
41  
42  
43  
44  
45  
46

# BMJ Open

## Exercise for people living with frailty and receiving haemodialysis: a mixed-methods randomised controlled feasibility study.

|                                 |                                                                                                                                                                                                                                                                                                                                                                                                                                                                                                                                                                                                                                                                                                                                                                                                                                                                                                                                                                                                                                                                                                                                                                                                                                                                                                                                                                                                                                                                                                                                                                                                                                                                                                                                                                                                                                                                                     |
|---------------------------------|-------------------------------------------------------------------------------------------------------------------------------------------------------------------------------------------------------------------------------------------------------------------------------------------------------------------------------------------------------------------------------------------------------------------------------------------------------------------------------------------------------------------------------------------------------------------------------------------------------------------------------------------------------------------------------------------------------------------------------------------------------------------------------------------------------------------------------------------------------------------------------------------------------------------------------------------------------------------------------------------------------------------------------------------------------------------------------------------------------------------------------------------------------------------------------------------------------------------------------------------------------------------------------------------------------------------------------------------------------------------------------------------------------------------------------------------------------------------------------------------------------------------------------------------------------------------------------------------------------------------------------------------------------------------------------------------------------------------------------------------------------------------------------------------------------------------------------------------------------------------------------------|
| Journal:                        | <i>BMJ Open</i>                                                                                                                                                                                                                                                                                                                                                                                                                                                                                                                                                                                                                                                                                                                                                                                                                                                                                                                                                                                                                                                                                                                                                                                                                                                                                                                                                                                                                                                                                                                                                                                                                                                                                                                                                                                                                                                                     |
| Manuscript ID                   | bmjopen-2020-041227.R2                                                                                                                                                                                                                                                                                                                                                                                                                                                                                                                                                                                                                                                                                                                                                                                                                                                                                                                                                                                                                                                                                                                                                                                                                                                                                                                                                                                                                                                                                                                                                                                                                                                                                                                                                                                                                                                              |
| Article Type:                   | Original research                                                                                                                                                                                                                                                                                                                                                                                                                                                                                                                                                                                                                                                                                                                                                                                                                                                                                                                                                                                                                                                                                                                                                                                                                                                                                                                                                                                                                                                                                                                                                                                                                                                                                                                                                                                                                                                                   |
| Date Submitted by the Author:   | 06-Sep-2020                                                                                                                                                                                                                                                                                                                                                                                                                                                                                                                                                                                                                                                                                                                                                                                                                                                                                                                                                                                                                                                                                                                                                                                                                                                                                                                                                                                                                                                                                                                                                                                                                                                                                                                                                                                                                                                                         |
| Complete List of Authors:       | <p>Young, Hannah; University of Leicester, Department of Respiratory Sciences; University Hospitals of Leicester NHS Trust, Department of Research and Innovation</p> <p>March, Daniel; University of Leicester, Department of Cardiovascular Sciences</p> <p>Highton, Patrick; University of Leicester, Department of Cardiovascular Sciences; Loughborough University, National Centre for Sport and Exercise Medicine</p> <p>Graham-Brown, Matthew ; University of Leicester, Cardiovascular Sciences; Loughborough University, National Centre for Sport and Exercise Medicine</p> <p>Churchward, Darren; University of Leicester, Department of Cardiovascular Sciences</p> <p>Grantham, Charlotte; University of Leicester, Department of Cardiovascular Sciences</p> <p>Goodliffe, Samantha; University of Leicester, Department of Health Sciences</p> <p>Jones, William; University Hospitals of Leicester, Emergency Department, Leicester Royal Infirmary,</p> <p>Cheung, Mei-Mei; University Hospitals of Leicester, Renal, Respiratory and Cardiovascular Clinical Management Group</p> <p>Greenwood, Sharlene ; King's College Hospital, Department of Physiotherapy and Renal Medicine; King's College London, Department of Renal Medicine</p> <p>Eborall, Helen; University of Leicester, Department of Health Sciences</p> <p>Conroy, Simon; University of Leicester, Department of Health Sciences</p> <p>Singh, Sally; Leicester Biomedical Research Unit, Centre for Exercise &amp; Rehabilitation Science; University Hospitals of Leicester NHS Trust, Department of Respiratory Medicine, Glenfield Hospital</p> <p>Smith, Alice; University of Leicester, Department of Health Sciences</p> <p>Burton, James; University of Leicester, Department of Cardiovascular Sciences; Loughborough University, National Centre for Sport and Exercise Medicine</p> |
| <b>Primary Subject Heading</b>: | Renal medicine                                                                                                                                                                                                                                                                                                                                                                                                                                                                                                                                                                                                                                                                                                                                                                                                                                                                                                                                                                                                                                                                                                                                                                                                                                                                                                                                                                                                                                                                                                                                                                                                                                                                                                                                                                                                                                                                      |
| Secondary Subject Heading:      | Rehabilitation medicine                                                                                                                                                                                                                                                                                                                                                                                                                                                                                                                                                                                                                                                                                                                                                                                                                                                                                                                                                                                                                                                                                                                                                                                                                                                                                                                                                                                                                                                                                                                                                                                                                                                                                                                                                                                                                                                             |
| Keywords:                       | Dialysis < NEPHROLOGY, End stage renal failure < NEPHROLOGY,                                                                                                                                                                                                                                                                                                                                                                                                                                                                                                                                                                                                                                                                                                                                                                                                                                                                                                                                                                                                                                                                                                                                                                                                                                                                                                                                                                                                                                                                                                                                                                                                                                                                                                                                                                                                                        |

1  
2  
3  
4  
5  
6  
7  
8  
9  
10  
11  
12  
13  
14  
15  
16  
17  
18  
19  
20  
21  
22  
23  
24  
25  
26  
27  
28  
29  
30  
31  
32  
33  
34  
35  
36  
37  
38  
39  
40  
41  
42  
43  
44  
45  
46  
47  
48  
49  
50  
51  
52  
53  
54  
55  
56  
57  
58  
59  
60

|  |                                                                               |
|--|-------------------------------------------------------------------------------|
|  | REHABILITATION MEDICINE, QUALITATIVE RESEARCH, Clinical trials < THERAPEUTICS |
|  |                                                                               |

SCHOLARONE™  
Manuscripts





I, the Submitting Author has the right to grant and does grant on behalf of all authors of the Work (as defined in the below author licence), an exclusive licence and/or a non-exclusive licence for contributions from authors who are: i) UK Crown employees; ii) where BMJ has agreed a CC-BY licence shall apply, and/or iii) in accordance with the terms applicable for US Federal Government officers or employees acting as part of their official duties; on a worldwide, perpetual, irrevocable, royalty-free basis to BMJ Publishing Group Ltd ("BMJ") its licensees and where the relevant Journal is co-owned by BMJ to the co-owners of the Journal, to publish the Work in this journal and any other BMJ products and to exploit all rights, as set out in our [licence](#).

The Submitting Author accepts and understands that any supply made under these terms is made by BMJ to the Submitting Author unless you are acting as an employee on behalf of your employer or a postgraduate student of an affiliated institution which is paying any applicable article publishing charge ("APC") for Open Access articles. Where the Submitting Author wishes to make the Work available on an Open Access basis (and intends to pay the relevant APC), the terms of reuse of such Open Access shall be governed by a Creative Commons licence – details of these licences and which [Creative Commons](#) licence will apply to this Work are set out in our licence referred to above.

Other than as permitted in any relevant BMJ Author's Self Archiving Policies, I confirm this Work has not been accepted for publication elsewhere, is not being considered for publication elsewhere and does not duplicate material already published. I confirm all authors consent to publication of this Work and authorise the granting of this licence.

1  
2  
3  
4 1 **Exercise for people living with frailty and receiving haemodialysis: a mixed-**  
5  
6  
7 2 **methods randomised controlled feasibility study.**  
8  
9  
10 3

11  
12 4 Hannah ML Young (MSc)<sup>1,2</sup>, Daniel S March (PhD)<sup>3</sup>, Patrick J Highton (PhD)<sup>3,4</sup>, Matthew  
13  
14 5 PM Graham-Brown (PhD)<sup>3,4</sup>, Darren C Churchward (MSc)<sup>3</sup>, Charlotte Grantham (BSc)<sup>3</sup>, S  
15  
16 6 Goodliffe (MSc)<sup>5</sup>, William Jones (BAHons)<sup>6</sup>, Mei-Mei Cheung (BAHons)<sup>7</sup>, Sharlene A  
17  
18 7 Greenwood (PhD)<sup>8</sup>, Helen Eborall (PhD)<sup>9</sup>, Simon Conroy (PhD)<sup>5</sup>, Sally J Singh (PhD)<sup>10,11</sup>,  
19  
20 8 Alice C Smith (PhD)<sup>5</sup>, James O Burton (MD)<sup>3,4</sup>.  
21  
22  
23

24  
25 9 <sup>1</sup>Department of Respiratory Sciences, University of Leicester, Leicester, UK.  
26

27  
28 10 <sup>2</sup>Department of Research and Innovation, University Hospitals of Leicester, UK  
29

30  
31 11 <sup>3</sup>Cardiovascular Sciences, University of Leicester, UK.  
32

33  
34 12 <sup>4</sup>National Centre for Sport and Exercise Medicine, Loughborough University, UK.  
35

36  
37 13 <sup>5</sup>Department of Health Sciences, University of Leicester, UK.  
38

39  
40 14 <sup>6</sup> Emergency Department, Leicester Royal Infirmary, University Hospitals of Leicester, UK.  
41

42  
43 15 <sup>7</sup> Renal, Respiratory and Cardiovascular Clinical Management Group, University Hospitals of  
44  
45 16 Leicester, UK.  
46

47  
48 17 <sup>8</sup>Department of Physiotherapy and Renal Medicine, King's College Hospital and Department  
49  
50 18 of Renal Medicine, King's College London, UK.  
51

52  
53 19 <sup>9</sup>Social Science Applied to Healthcare Improvement Research (SAPPHIRE) Group,  
54  
55 20 Department of Health Sciences, University of Leicester, UK.  
56  
57  
58  
59  
60

1  
2  
3 21 <sup>10</sup>Centre for Exercise & Rehabilitation Science, Leicester Biomedical Research Unit,  
4  
5 22 Glenfield Hospital, UK.  
6  
7

8 23 <sup>11</sup>Department of Respiratory Medicine, Glenfield Hospital, University Hospitals of  
9  
10 24 Leicester,UK.  
11  
12

13  
14 25

15  
16 26 Corresponding author:

17  
18  
19 27 Hannah Young

20  
21  
22 28 Leicester Kidney Lifestyle Team

23  
24  
25 29 Academic Unit

26  
27  
28 30 Leicester General Hospital

29  
30  
31 31 Gwendolen Road

32  
33  
34 32 Leicester

35  
36  
37 33 UK

38  
39  
40 34 LE4 5PW

41  
42  
43 35 0116 258 4346

44  
45  
46 36 hmly1@le.ac.uk

47  
48  
49 37

50  
51  
52 38 Running title: Exercise for frail haemodialysis patients

53  
54  
55 39 Abstract word count: 280

56  
57  
58 40 Word count: 4884

59  
60

1  
2  
3 41 **ABSTRACT**  
4  
5

6 42 **Objectives**  
7  
8

9 43 Frailty is highly prevalent in haemodialysis (HD) patients, leading to poor outcomes. This  
10  
11 44 study aimed to determine whether a Randomised Controlled Trial (RCT) of intradialytic  
12  
13 45 exercise is feasible for frail HD patients, and explore how the intervention may be tailored to  
14  
15  
16 46 their needs.  
17

18  
19 47 **Design**  
20

21  
22 48 Mixed-methods feasibility.  
23  
24

25 49 **Setting & participants**  
26  
27

28 50 Prevalent adult HD patients of the *CYCLE-HD* trial with a Clinical Frailty Scale Score of 4-7  
29  
30 51 (vulnerable to severely frail) were eligible for the feasibility study.  
31  
32

33 52 **Interventions**  
34  
35

36 53 Participants in the exercise group undertook six-months of thrice-weekly, progressive,  
37  
38 54 moderate intensity intradialytic cycling (IDC).  
39  
40

41 55 **Outcomes**  
42  
43

44 56 Primary outcomes were related to feasibility. Secondary outcomes were falls incidence  
45  
46 57 measured from baseline to one year following intervention completion, and exercise capacity,  
47  
48 58 physical function, physical activity and patient-reported outcomes (PROMS) measured at  
49  
50 59 baseline and six months. Acceptability of trial procedures and the intervention were explored  
51  
52 60 via diaries and interviews with n=25 frail HD patients who both participated in (n=13, 52%),  
53  
54 61 and declined (n=12, 48%), the trial.  
55  
56  
57

58  
59 62 **Results**  
60

1  
2  
3 63 124 (31%) patients were eligible, and of these 64 (52%) consented with 51 (80%)  
4  
5 64 subsequently completing a baseline assessment. N=24 (71% male; 59 ± 13 years) dialysed  
6  
7 65 during shifts randomly assigned to exercise and n=27 (81% male; 65 ± 11 years) shifts  
8  
9 66 assigned to usual care. N=6 (12%) were lost to follow-up. The exercise group completed 74%  
10  
11 67 of sessions. 27 to 89% of secondary outcome data were missing. Frail HD patients outlined  
12  
13 68 several ways to enhance trial procedures. Maintaining ability to undertake activities of daily  
14  
15 69 living and social participation were outcomes of primary importance. Participants desired a  
16  
17 70 varied exercise programme.  
18  
19  
20  
21

## 22 71 **Conclusions**

23  
24  
25 72 A definitive RCT is feasible, however a comprehensive exercise programme may be more  
26  
27 73 efficacious than IDC in this population.  
28  
29

## 30 74 **Trial Registration**

31  
32  
33 75 ISRCTN11299707; ISRCTN12840463  
34  
35

36 76  
37  
38

39 77 **Keywords:** feasibility; frailty; exercise; haemodialysis; mixed-methods.  
40  
41  
42  
43  
44  
45  
46  
47  
48  
49  
50  
51  
52  
53  
54  
55  
56  
57  
58  
59  
60

## 78 **STRENGTHS AND LIMITATIONS OF THIS STUDY**

- 79 • To our knowledge, this is the first study to evaluate the feasibility of an exercise  
80 intervention for people living with frailty and receiving haemodialysis (HD).
- 81 • The Clinical Frailty Scale, a frailty risk-stratification measure which has been  
82 validated in an HD population, was used to identify eligible participants.
- 83 • This study is also the first to explore how trial procedures and exercise programmes  
84 should be specifically tailored to the needs of people living with frailty and receiving  
85 HD, from their own perspectives.
- 86 • Multiple qualitative methods (interviews and diaries) were used to explore  
87 participants perceptions, providing a form of triangulation which strengthens the  
88 conclusions made.
- 89 • Due to the nature of the intervention and resource limitations, we could not blind  
90 intervention providers, outcome assessors or study participants to group allocation.

## 91 INTRODUCTION

92 Frailty, “a multidimensional syndrome of decreased physiological reserve leading to  
93 increased vulnerability to minor health stressors”, is highly prevalent within the  
94 haemodialysis (HD) population.<sup>1,2</sup> Increasing frailty is associated with worsening outcomes,  
95 including mortality, hospitalisation, falls, reduced Health-Related Quality of Life (HRQoL),  
96 psychological well-being, physical function, ability to undertake activities of daily living  
97 (ADLs) and increased symptom burden.<sup>3-5</sup>

98  
99 Despite this, frailty is not static and evidence suggests that some factors associated with  
100 frailty are amenable to change.<sup>6</sup> Whilst the possible mediating role of exercise has been  
101 discussed, to our knowledge no original studies have examined the feasibility or effectiveness  
102 of an exercise programme for people living with frailty and receiving HD.<sup>7</sup> To date, exercise  
103 interventions for HD patients have focused upon intradialytic exercise, most commonly  
104 delivered by means of a cycle ergometer (intradialytic cycling, IDC), yet little is known about  
105 whether this is the most appropriate training stimulus for frail HD patients.<sup>8</sup> In addition, HD  
106 treatment can be poorly tolerated by frail patients and therefore IDC may represent an  
107 additional stressor to which these patients are particularly vulnerable.<sup>9</sup> European renal best  
108 practice guidance highlights a need for studies which identify how exercise programmes  
109 should be more specifically tailored to the needs of frail CKD patients<sup>10</sup>, yet to date, there has  
110 also been no exploration of the needs, barriers and facilitators to exercise from the  
111 perspectives of people living with frailty and receiving HD themselves.

112  
113 The aim of this study was to determine the feasibility of conducting an RCT investigating the  
114 effects of IDC for HD patients living with frailty by: (i) estimating rates of eligibility,

1  
2  
3 115 recruitment, retention, exercise adherence and outcome acceptability; and exploring (ii) the  
4  
5 116 potential benefits of IDC across a range of secondary outcomes; and (iii) the perceptions of  
6  
7 117 frail HD patients in relation to participating in clinical research, IDC and a tailored exercise  
8  
9 118 intervention.

10  
11  
12  
13 119

## 14 15 16 120 **METHODS**

### 17 18 19 121 **Design**

20  
21  
22 122 A prospective, randomised controlled feasibility study was conducted alongside concurrent  
23  
24 123 qualitative diaries and interviews (Trial Registration numbers ISRCTN11299707;  
25  
26 124 ISRCTN12840463). The feasibility study was a secondary analysis of the *CYCLE-HD* trial,  
27  
28 125 whose aims and methods are reported elsewhere.<sup>11</sup> The qualitative component was  
29  
30 126 underpinned by a constructivist Grounded Theory approach.<sup>12</sup> All participants provided  
31  
32 127 written informed consent.

33  
34  
35  
36 128

### 37 38 39 129 **Participants**

40  
41  
42 130 Prevalent adult (over 18 years) HD patients were recruited from three centres within the UK  
43  
44 131 East Midlands Renal Network. In addition to the inclusion and exclusion criteria for the  
45  
46 132 *CYCLE-HD* trial (supplementary material 1), the Clinical Frailty Scale (CFS), a risk  
47  
48 133 stratification tool, was used to identify vulnerable to severely frail participants (CFS score 4-  
49  
50 134 7).<sup>13</sup> The CFS has good predictive abilities in an HD population, good construct validity  
51  
52 135 when compared with the Frailty Index, is less burdensome than the Frailty Phenotype, and has  
53  
54 136 been validated in an HD population.<sup>13-15</sup>



1  
2  
3 137 The inclusion and exclusion criteria for the qualitative component mirrored the feasibility  
4  
5 138 study and both those involved in the trial, and those who were eligible but declined to  
6  
7 139 participate, were eligible.  
8  
9

10  
11 140

### 12 13 14 141 **Randomisation**

15  
16 142 HD cohorts were randomised prior to screening, based on a computer-generated  
17  
18 143 randomisation algorithm held by the Robertson Centre for Biostatistics at the University of  
19  
20 144 Glasgow.  
21  
22

23  
24 145

### 25 26 27 146 **Recruitment**

28  
29  
30 147 Patients were screened for eligibility by their supervising nephrologist. Suitable patients were  
31  
32 148 approached during HD, and the study explained. For the qualitative component, participants  
33  
34 149 who had been involved in the feasibility study were recruited following completion of, or  
35  
36 150 withdrawal from, the trial to prevent contamination.  
37  
38

39  
40 151

### 41 42 43 152 **Exercise intervention**

44  
45  
46 153 Supplementary material 2 outlines the exercise intervention in line with TIDieR guidance.<sup>16</sup>  
47  
48 154 Briefly, following a one-month run-in, participants in the exercise group undertook thrice-  
49  
50 155 weekly supervised, moderate-intensity (Rating of Perceived Exertion, RPE 12-14) IDC  
51  
52 156 (MOTomed Letto2, Reck, Germany), for six months.<sup>17</sup> Cycling resistance was progressively  
53  
54 157 increased to maintain RPE in response to exercise adaptation. Both arms continued with usual  
55  
56 158 care HD as described elsewhere.<sup>11</sup>  
57  
58  
59  
60

1  
2  
3 159  
4  
56 160 **Sample size**  
7  
8

9 161 Determinations of sample size from a power calculation around a primary outcome are not  
10 162 relevant to a feasibility study and sample sizes of 24-50 are considered sufficient.<sup>18</sup> For the  
11 163 qualitative component maximum variation sampling was initially used to ensure diversity in  
12 164 frailty status and level of trial participation.<sup>12</sup> As understanding was gained from preliminary  
13 165 analyses, theoretical sampling was used to further recruit participants.<sup>12</sup> A maximum of 30  
14 166 interviews were planned, but data collection ceased at the point where theoretical categories  
15 167 were saturated and no longer generated new insight (n=25).

16 168  
17  
18  
19  
20  
21  
22  
23  
24  
2526 169 **Primary outcome measures**  
27  
28

29 170 The primary feasibility outcomes are presented in supplementary material 3. Judgement  
30 171 regarding feasibility was based upon a set of *a priori* progression criteria. For each criterion,  
31 172 the development of ‘stop’ (indicating when there are issues with the trial that cannot be  
32 173 resolved) and ‘go’ thresholds (when there are no issues that may impede the success of a  
33 174 trial) were co-produced by patients, clinicians and researchers.<sup>19,20</sup> Results falling between  
34 175 these thresholds indicated that adaptation to trial procedures may render a definitive RCT  
35 176 viable.<sup>20</sup>

36  
37  
38  
39  
40  
41  
42  
43  
44  
45  
46  
47  
48  
49 177  
5051 178 **Baseline demographic and clinical variables**  
52  
53

54 179 Demographic and clinical characteristics were gathered from participants’ medical notes. The  
55 180 Charlson Comorbidity Index (CCI) was used to estimate the burden of comorbid disease.<sup>21</sup>

56  
57  
58  
59  
60 181

1  
2  
3 **182 Secondary outcome measures**  
4  
5

6 183 Multiple secondary outcomes were used to determine the potential effects of IDC and most  
7  
8 184 appropriate primary endpoint for a future RCT. Outcome assessors were not blinded to group  
9  
10 allocation.  
11  
12

13  
14 186

15  
16 187 Information on the number of falls, defined as ‘an unexpected event in which the participants  
17  
18 188 come to rest on the ground, floor, or lower-level’ which resulted in Emergency Department  
19  
20 189 visits and hospital admissions were collected from baseline to one year following intervention  
21  
22 190 completion from medical records and hospital episode statistics.<sup>22</sup>  
23  
24

25  
26 191

27  
28  
29 192 Field tests of exercise capacity and physical function included the Incremental Shuttle Walk  
30  
31 193 Test (ISWT), the Endurance Shuttle Walk Test (ESWT), the Short Physical Performance  
32  
33 194 Battery (SPPB) and the Sit-to Stand in Sixty Seconds (STS60).<sup>11</sup> Physical activity (PA) was  
34  
35 195 objectively measured using the SenseWear Armband (SWA) Pro 3 (BodyMedia, Inc.,  
36  
37 196 Pittsburgh PA, USA) for seven consecutive days, including HD. Established criteria were  
38  
39 197 used to ensure representative data for average daily wear-time, steps per day, and time  
40  
41 198 (minutes per day) spent in sedentary (defined as 0-1.5 METS), light (1.6-2.9 METS)  
42  
43 199 moderate (3-6 METS) and vigorous (>6 METS) PA.<sup>23</sup> PROMs collected are outlined in  
44  
45 200 supplementary material 4.<sup>11</sup> All outcomes were collected at baseline and six months.  
46  
47  
48  
49

50  
51 201

52  
53  
54 202 Serious adverse events (SAEs) were recorded and assessed from baseline to six-months as  
55  
56 203 outlined previously.<sup>11</sup>  
57  
58

59 204  
60

## 205 **Diaries and interviews**

206 Participants first completed a prospective falls diary, recognised as the current 'gold  
207 standard' for falls data collection, for up to three months to examine the feasibility of this  
208 outcome measure within a future definitive RCT.<sup>22</sup> Semi-structured interviews then explored  
209 participants' experiences of: (i) keeping a falls diary; (ii) participating in a trial; and (iii) their  
210 perceptions of IDC and a tailored exercise intervention.

211  
212 Information to support diary collection and a topic guide for the interviews (supplementary  
213 material 5) was developed by HMLY, HE and a patient and public involvement group.  
214 Topics were tailored according to the level of involvement in the trial, and the content of  
215 diaries. Interviews were conducted during HD, in the participant's home, or in the hospital by  
216 HMLY and lasted 20 to 120 minutes (mean 63 minutes). All were digitally audio-recorded  
217 and transcribed verbatim.

## 219 **Data analysis**

220 Sample characteristics are presented as mean  $\pm$  standard deviation, median (IQR) or n (%), as  
221 appropriate. Descriptive statistics and confidence intervals were used to estimate feasibility  
222 outcomes.<sup>24</sup> The percentage of exercise sessions completed was used to establish the  
223 acceptability of IDC. Outcome acceptability was determined by quantifying the amount of  
224 missing data across secondary outcomes. No imputation was performed to account for  
225 missing data. No statistical testing relating to the efficacy of the exercise intervention was  
226 undertaken, although the potential benefits of exercise were estimated.<sup>24</sup> For falls, summary  
227 data, incident rate ratio (the ratio of the incidence rate in the exercise group divided by the  
228 incidence rate in the usual care group) and 95% confidence intervals were presented.

1  
2  
3 229 Statistical analyses were performed using SPSS 24 (IBM UK Ltd, UK) and Stata 16  
4  
5 230 (StataCorp LCC, USA).

6  
7  
8 231  
9  
10  
11 232 Qualitative analysis was undertaken by HMLY and SG and informed by a constant  
12  
13 233 comparative approach.<sup>12</sup> Transcripts were reviewed, then coded line by line, followed by  
14  
15 234 focused, and then theoretical, coding.<sup>12</sup> NVivo11 software (QSR International Ltd, version  
16  
17 235 11, 2016) was used to facilitate data management. Finally, qualitative and quantitative results  
18  
19 236 were merged in a 'joint display' to facilitate an overall assessment of feasibility.<sup>25</sup>

20  
21  
22  
23 237

## 24 238 **Patient and public involvement**

25  
26  
27 239 The patient and public involvement (PPI) group for this study comprised patients of all ages,  
28  
29 240 genders and ethnicities who were living with frailty and receiving HD, and their relatives.  
30  
31 241 They agreed this study was an important priority for further investigation and particularly  
32  
33 242 stressed the need to add the qualitative component. The PPI group were involved early in the  
34  
35 243 ethical approval stages and were actively engaged in writing lay summaries and providing  
36  
37 244 patient perspectives on data collection procedures, ethical issues, and the study dissemination  
38  
39 245 plans. They assisted in the preparation of study documentation, interview topic guides and  
40  
41 246 diary keeping materials. During the study, members of the PPI group attended regular  
42  
43 247 steering meetings and were involved in co-producing the progression criteria.  
44  
45  
46  
47  
48  
49  
50

51 248

## 52 249 **RESULTS**

### 53 250 **Feasibility study**

54  
55  
56  
57  
58  
59  
60

1  
2  
3 251 *Eligibility and recruitment*  
4

5 252 Screening and recruitment took place from March 2015 to 2018, with data collection  
6  
7 253 completed by November 2018. Figure 1 outlines the trial CONSORT. Of the 406 patients  
8  
9 254 screened in the *CYCLE-HD* trial, n=124 (30%, 95% CI 26.1% to 35.3%) were identified as  
10  
11 255 vulnerable to severely frail and therefore eligible for the feasibility study. Sixty-four  
12  
13 256 participants (52%, 95% CI 42.5% to 60.7%) consented. Reasons for declining were lack of  
14  
15 257 time or family support and reluctance to undergo outcome testing, or to be randomised. Those  
16  
17 258 who declined to participate had a median age of 73 (IQR 67-81) years. N=35 (58%) were  
18  
19 259 female and n=27 (42%) male. Twenty-five (42%) were classified as vulnerable according to  
20  
21 260 the CFS, n=17 (28%) were mildly frail, n=9 (15%) moderately frail and n=9 (15%) severely  
22  
23 261 frail. Thirteen (20%, 95% CI 11.3% to 32.2%) participants withdrew prior to baseline  
24  
25 262 assessment. N=51 (80%, 95% CI 67.8% to 88.7%) completed this assessment. Twenty-four  
26  
27 263 (47%) participants received dialysis during shifts randomised to exercise and twenty-seven  
28  
29 264 (53%) during shifts randomised to usual care.  
30  
31  
32  
33  
34  
35

36 265 [FIGURE ONE TRIAL CONSORT TO BE INSERTED HERE]  
37  
38  
39 266

40  
41  
42 267 *Participant characteristics*  
43

44 268 Table 1 displays the characteristics of the trial participants at baseline. Groups were well  
45  
46 269 matched across most variables. A lower proportion of participants were female (23.5%) and  
47  
48 270 severely frail (6%) overall.  
49  
50  
51  
52  
53  
54  
55  
56  
57  
58  
59  
60

271 *Table 1. Baseline demographic and clinical characteristics of the trial participants.*

|                               |                              | Usual care<br>(n=27) | Exercise<br>(n=24) | All<br>(n=51)   |
|-------------------------------|------------------------------|----------------------|--------------------|-----------------|
| Age (years)                   |                              | 65 ± 11              | 59 ± 13            | 63 ± 12         |
| Sex (n, %)                    | Female                       | 5 (18.5%)            | 7 (29%)            | 12 (23.5%)      |
| Ethnicity (n, %)              | White                        | 12 (44%)             | 11 (46%)           | 23 (45%)        |
|                               | Asian or Asian<br>British    | 11 (41%)             | 11 (46%)           | 22 (43%)        |
|                               | Caribbean                    | 1 (4%)               | 0 (0%)             | 1 (2%)          |
|                               | Other ethnic                 | 1 (4%)               | 1 (4%)             | 2 (4%)          |
|                               | Not stated                   | 2 (7%)               | 1 (4%)             | 3 (6%)          |
| Diagnosis (n, %)              | Aetiology<br>Uncertain       | 8 (29%)              | 7 (29%)            | 15 (29%)        |
|                               | Diabetic<br>Nephropathy      | 5 (19%)              | 7 (29%)            | 12 (23%)        |
|                               | Glomerulonephritis           | 5 (19%)              | 3 (14%)            | 8 (16%)         |
|                               | Renal Vascular<br>Disease    | 3 (11%)              | 2 (8%)             | 5 (10%)         |
|                               | Other diagnoses              | 4 (15%)              | 1 (4%)             | 5 (10%)         |
|                               | Chronic<br>Pyelonephritis    | 2 (7%)               | 1 (4%)             | 3 (6%)          |
|                               | Polycystic Kidney<br>Disease | 0 (0%)               | 2 (8%)             | 2 (4%)          |
|                               | Not recorded                 | 0 (0%)               | 1 (4%)             | 1 (2%)          |
| CCI                           |                              | 5 ± 2                | 5 ± 2              | 5 ± 2           |
| Previous transplant (n,<br>%) | No                           | 21 (75%)             | 18 (75%)           | 39 (76.5%)      |
|                               | Yes                          | 6 (21%)              | 6 (25%)            | 12 (23.5%)      |
| Time on HD (months)           |                              | 17 (7-53)            | 13 (10-61)         | 16 (8-53)       |
| BMI (kg/m <sup>2</sup> )      |                              | 27.38 ±<br>6.72      | 25.87 ±<br>5.28    | 26.67 ±<br>6.07 |
| Total no. medications         |                              | 12 ± 4               | 12 ± 4             | 12 ± 4          |
| Clinical Information          | Albumin (g/L)                | 35.4 ± 4.4           | 37.4 ± 4.3         | 36.4 ± 4.4      |
|                               | Haemoglobin (g/L)            | 107 ± 12             | 112 ± 17           | 107 ± 15        |
| Haemodialysis                 | URR (%)*                     | 74 (70-80)           | 75 (58-79)         | 74 (71-79)      |
|                               | SBP (mmHg)                   | 143 ± 21             | 144 ± 21           | 144 ± 21        |
|                               | DBP (mmHg)*                  | 65 (62-78)           | 78 (69-86)         | 76 (62-81)      |
| CFS (n, %)                    | 4, Vulnerable                | 13 (48%)             | 10 (42%)           | 23 (45%)        |
|                               | 5, Mildly frail              | 5 (18.5%)            | 7 (29%)            | 12 (23.5%)      |
|                               | 6, Moderately frail          | 8 (30%)              | 5 (21%)            | 13 (25.5%)      |
|                               | 7, Severely frail            | 1 (3.5%)             | 2 (8%)             | 3 (6%)          |

272 *Values reported are mean and SD (±), except for \*median and IQR. Abbreviations: BMI, body mass*  
 273 *index; CCI, Charlson Comorbidity Index; CFS, Clinical Frailty Scale DBP, diastolic blood pressure;*  
 274 *SBP, systolic blood pressure; URR, urea reduction ratio.*

275 *Retention*

276 Six (12%, 95% CI 4.4% to 23.9%) participants were lost to follow-up: three participants  
 277 withdrew due to ill-health, one moved away, one changed HD regime and one withdrew  
 278 consent.

279

280 *Exercise adherence*

281 A mean of  $61 \pm 17$  exercise sessions were completed over the six-month intervention,  
 282 representing an adherence rate of  $74 \pm 20\%$ . The most frequent reasons for missing an exercise  
 283 session were declining ( $n = 175$  out of 535 sessions omitted in total, 33%), feeling unwell ( $n =$   
 284 116, 22%) and pain ( $n = 105$ , 20%). Table 2 summarises the mean amount of exercise  
 285 achieved. On average, participants reached the prescribed level of exercise by six months,  
 286 although  $n = 18$  (75%) were unable to achieve this by the end of the one-month run-in period.

287 *Table 2 Mean (SD) exercise achieved per session over the six-month duration of the*  
 288 *intervention.*

|                            |             |
|----------------------------|-------------|
| Duration (mins)            | $35 \pm 8$  |
| Speed (RPM)                | $63 \pm 10$ |
| Intensity (RPE)            | $13 \pm 1$  |
| Gear                       | $9 \pm 4$   |
| Distance (Miles)           | $7 \pm 3$   |
| Power (Watts)              | $13 \pm 6$  |
| Energy expenditure (Kcals) | $64 \pm 31$ |

289 *All data presented as mean and SD ( $\pm$ ). Abbreviations: kcals, kilocalories, mins, minutes; RPE, rating*  
 290 *of perceived exertion; RPM, revolutions per minute.*

291  
 292 *Outcome acceptability*

293 For tests of exercise capacity (ISWT and ESWT);  $n = 14$  (27%) did not complete at least one  
 294 test at baseline,  $n = 30$  (64%) at interim and  $n = 26$  (58%) at final. For tests of physical function;  
 295  $n = 20$  (39%) did not complete at least one test at baseline,  $n = 33$  (70%) at interim and  $n = 30$   
 296 (67%) at final. For PROMs;  $n = 27$  (53%) did not complete at least one questionnaire at



1  
2  
3 297 baseline, n=27 (57%) at interim and n=40 (89%) at final. For PA data; n=21 (41%) were  
4  
5 298 missing at baseline, and n=26 (58%) were missing at the final assessment. Declining was the  
6  
7 299 primary reason for non-completion for all outcomes across all time points.  
8  
9

10  
11 300

12  
13  
14 301 *Secondary outcomes*

15  
16 302 Summary falls data are presented in supplementary material 6. The crude falls incident rate  
17  
18 303 ratio (IRR) was 1.95 (95% CI 0.63 to 7.18), suggestive of an almost two-fold increased  
19  
20 304 incidence of falls within the usual care group.  
21  
22

23  
24 305

25  
26 306 Exercise capacity was maintained in the exercise group, but deteriorated in the usual care  
27  
28 307 group, resulting in an overall difference of 36m (95% CI -12 to 84) in ISWT results and 181  
29  
30 308 seconds (95% CI -92 to 453) in EWST time. The time taken to complete the STS5 also  
31  
32 309 increased in the usual care group (suggesting a deterioration in function), but was maintained  
33  
34 310 in the exercise group, resulting in an overall difference of 5 seconds (95% CI -4 to 15)  
35  
36 311 (supplementary material 7).  
37  
38  
39

40  
41 312

42  
43  
44 313 Step count increased in the exercise group resulting in an overall difference of 859 steps/day  
45  
46 314 (95%CI -825 to 2543) on HD days and 888 steps/day (95%CI -84 to 1861) on non-HD days.

47  
48 315 Whilst sedentary time was increased in the exercise group on all days compared with the  
49  
50 316 usual care group, this appeared to be offset by increases in light PA and moderate PA, and  
51  
52 317 maintenance (albeit of low levels) of vigorous PA versus maintenance or deterioration across  
53  
54 318 the same metrics in the usual care group (supplementary material 8). For PROMs, outcomes  
55  
56 319 were largely unchanged, except for the DASI score, which appeared to deteriorate in the  
57  
58 320 exercise group and increase in the usual care group, resulting in an overall difference in score  
59  
60

1  
2  
3 321 of 4.93 (95% CI -0.94 to 10.80) and the mental component summary score of the SF12 which  
4  
5 322 improved in the usual care group, resulting in an overall difference in score of 4 (95% CI -3  
6  
7 323 to 10). Exercisers appeared to have a greater perception of the benefits of exercise compared  
8  
9 324 with those in the control group (3, 95% CI -4 to 11) (supplementary material 9).

10 325

### 16 326 *Serious adverse events*

17  
18 327 In total, n=13 (25%) experienced an SAE during the feasibility study, n=8 (33%) in the  
19  
20 328 exercise group and n=5 (19%) in the usual care group. The most common reasons for SAEs  
21  
22 329 were vascular access complications (n=3, 17%), stroke (n=3, 17%), acute coronary syndrome  
23  
24 330 (n=2, 11%) and non-specific chest pain (n=2, 11%). All events were classed as serious as  
25  
26 331 they resulted in hospitalisation. All resolved, and none were directly related to the  
27  
28 332 intervention or trial.

29 333

### 35 334 **Qualitative findings**

36  
37  
38 335 Thirty-seven patients were approached for the qualitative study. Twenty-six were recruited  
39  
40 336 and one died prior to data collection. Thirteen had participated in the feasibility trial. Nine  
41  
42 337 received dialysis during shifts randomised to exercise, and four randomised to usual care.  
43  
44 338 Twelve participants had declined to take part in the feasibility trial. Full characteristics for the  
45  
46 339 qualitative sample are provided in supplementary material 10.

47 340

48  
49  
50  
51 341 In addition to categories relating to the feasibility outcomes, categories relating to both the  
52  
53 342 delivery and the characteristics of a tailored exercise intervention were identified. These are  
54  
55 343 presented alongside illustrative quotes within Tables 3, 4, 5 and 6 and Figure 2.

1  
2  
3 344  
4  
56 345 *Feasibility and acceptability of a definitive trial*  
78 346 *Eligibility and recruitment*  
9

10 347 Declining to participate was underpinned by a perception that the trial could worsen overall  
11  
12 348 health, particularly amongst those who had not previously participated in research or had  
13  
14 349 recently commenced HD. Female participants believed that exercise was predominantly for  
15  
16 350 men and that they were already doing enough daily activity, whilst participants living with  
17  
18 351 moderate to severe frailty viewed ageing as an inevitable decline unlikely to be influenced by  
19  
20 352 exercise. Motivators included a sense of altruism, and the perception that participation could  
21  
22 353 provide opportunities to improve individual outcomes; learn about their own health; and  
23  
24 354 access better healthcare. Participants felt that recruitment could be enhanced by the effective  
25  
26 355 use of non-verbal communication, rapport building, adaptation to study documentation and  
27  
28 356 actively involving family members in the recruitment process, as family support was often a  
29  
30 357 prerequisite to participation (Table 3).  
31  
32  
33  
34  
35  
36  
37  
38  
39

348

40 359 *Trial retention*  
41

42 360 The primary reasons for withdrawal were becoming unwell, the duration of the trial and the  
43  
44 361 research not meeting participants expectations. Participants suggested that having a rapport  
45  
46 362 and maintaining regular dialogue with the research team might help retain participants within  
47  
48 363 a future trial (Table 3).  
49  
50  
51  
52  
53  
54  
55  
56  
57  
58  
59  
60

364 *Table 3. Categories relating to trial eligibility, recruitment and retention with illustrative*  
 365 *quotes.*

| <b>Eligibility and recruitment</b>         |                                                                                                                                                                                                                                                                                                                                                                                                                                                                                                                                                                                                                                                                                                                                                                                                                                                                                             |
|--------------------------------------------|---------------------------------------------------------------------------------------------------------------------------------------------------------------------------------------------------------------------------------------------------------------------------------------------------------------------------------------------------------------------------------------------------------------------------------------------------------------------------------------------------------------------------------------------------------------------------------------------------------------------------------------------------------------------------------------------------------------------------------------------------------------------------------------------------------------------------------------------------------------------------------------------|
| Challenges to recruitment                  | <ul style="list-style-type: none"> <li>• [Interviewer]: "Have you ever taken part in any research before?" [Participant]: "No. I have not been asked really" (Female, moderately frail).</li> <li>• "If anything happens I am in trouble, I would rather avoid it [research]" (Male, severely frail).</li> <li>• "I don't think I had been dialysing all that long and I didn't know how [the trial] would affect me" (Male, mildly frail).</li> <li>• "I do enough, I am always out, up-down, do this, do that, I have just put clothes in the machine you know for a wash, I go for a shower you know" (Female, mildly frail).</li> <li>• "You have got to take age into consideration. Now I am getting old and there is a limit to what I can do. And it doesn't get any easier it gets worse" (Female, moderately frail)</li> </ul>                                                    |
| Motivators to participation                | <ul style="list-style-type: none"> <li>• "If it helps someone else who has the same problem as me, they might be able to do something for him that they couldn't do for me" (Male, moderately frail).</li> <li>• "I found the [outcome measures] very beneficial actually...it kind of educated me at the time...educationally it was informative" (Male, vulnerable).</li> <li>• "What I like about research is that you are better looked after. I think if patients were a bit more aware that you are going to get preferential treatment, I think it would make it more attractive" (Female, vulnerable).</li> </ul>                                                                                                                                                                                                                                                                   |
| Suggested methods of enhancing recruitment | <ul style="list-style-type: none"> <li>• "The research team should be there and explain that they don't want much, explain the benefits. Explain it's not for us [the research team] it's for the patients benefit, let them try and if then it doesn't go well [the participant] can stop it... it's not the information you give but talking as a person that's more important" (Male, vulnerable).</li> <li>• "If I have got confidence in [the researcher] and that [they] know what they are doing and why, then it's fine" (Male, mildly frail).</li> <li>• "I don't like it [the text] is too tiny, I can't even read [the information sheet] with reading glasses on...a picture or two might also help" (Female, mildly frail).</li> <li>• "There's a lot of sheets in [the information sheet], I think people will get fed up reading all that" (Female, mildly frail)</li> </ul> |
| <b>Trial retention</b>                     |                                                                                                                                                                                                                                                                                                                                                                                                                                                                                                                                                                                                                                                                                                                                                                                                                                                                                             |
|                                            | <ul style="list-style-type: none"> <li>• "I have thought of dropping out because I am unable to do much. I am not interested because...I am not well. I have got a lot of things [wrong] with my body" (Female, mildly frail).</li> <li>• "Somebody recently asked me about research and I tried it for about three weeks and I said no, not for me...I thought no, this is not what I want, it's not particularly helpful" (Female, moderately frail).</li> </ul>                                                                                                                                                                                                                                                                                                                                                                                                                          |

366 *The acceptability of IDC*

367 IDC was generally perceived to be a safe and positive use of HD treatment time. However, it  
 368 was also described as limited in scope, and participants were uncertain of its impact,  
 369 particularly upon mobility, symptoms and falls (Table 4).

370

371 *Table 4. Categories relating to the acceptability of IDC and illustrative quotes.*

|                                              |                                                                                                                                                                                                                                                                                                                                                                                                                                                                                                                                                                                                                                                                                                                                                                                                                                                                                                                                                                                                                                                                                                                                       |
|----------------------------------------------|---------------------------------------------------------------------------------------------------------------------------------------------------------------------------------------------------------------------------------------------------------------------------------------------------------------------------------------------------------------------------------------------------------------------------------------------------------------------------------------------------------------------------------------------------------------------------------------------------------------------------------------------------------------------------------------------------------------------------------------------------------------------------------------------------------------------------------------------------------------------------------------------------------------------------------------------------------------------------------------------------------------------------------------------------------------------------------------------------------------------------------------|
| A safe and positive use of HD treatment time | <ul style="list-style-type: none"> <li>• “Yes, I found it useful. It made me do some exercise instead of just laying here drinking tea and watching TV, doing jigsaw puzzles.” (Male, mildly frail).</li> <li>• “They bring the bike but first they test you... whether you’re safe to do it and all that.” (Female, mildly frail).</li> </ul>                                                                                                                                                                                                                                                                                                                                                                                                                                                                                                                                                                                                                                                                                                                                                                                        |
| Limited scope and uncertain impact of IDC    | <ul style="list-style-type: none"> <li>• “We did cycling, and that was no choice because that’s the only exercise we can do with our legs. You can’t do sit-ups or stand-ups while you are lying down because you’ve got this thing [HD] going on” (Male, moderately frail)</li> <li>• “I thought maybe it helps, I get rid of some problems or maybe you know I am not walking too much...so I say maybe if I do start cycling...you know I can walk...but nothing happened, no nothing.” (Male, severely frail).</li> <li>• “My legs have become stronger, they were wobbly...it's more sturdy now than before. Yet I still have the falls, that I cannot help. But my legs are stronger than they were. I am a bit more agile than I used to be.” (Male, moderately frail).</li> <li>• “It was fine, it was ok, I got on with it. I used to have a laugh but then eventually my knees were just so painful then my [blood] pressure played up a bit.” (Female, vulnerable).</li> <li>• “Blood pressure was coming down. Now I used to take medication for the blood pressure now I don’t take it.” (Male, vulnerable ).</li> </ul> |

372

373 *Outcome acceptability*

374 As indicated by participant quotations in Table 5, the number of outcomes and follow-ups  
 375 needed to be reduced and participants had a strong preference for outcomes that could be  
 376 collected during HD treatment. Many found the ISWT and STS60 assessments too  
 377 challenging. Participants were occasionally uncertain of the purpose of the questionnaires and

1  
2  
3 378 many reported difficulty quantifying symptom severity or a desire to provide 'anticipated'  
4  
5 379 responses.  
6  
7

8 380  
9

10  
11 381 Maintaining mobility, and the ability to undertake a range of ADLS and social roles were  
12  
13 382 viewed as key outcomes for a future trial. Only thirteen (52%) participants in the qualitative  
14  
15 383 study agreed to complete a falls diary and many reported they preferred falls information to  
16  
17 384 be collected during HD treatment. The majority who had fallen rarely reported them to  
18  
19 385 healthcare professionals, believing that they were an expected consequence of HD or having  
20  
21 386 had experience of their concerns about falls being overlooked. Consequently, falls prevention  
22  
23 387 was not viewed as a key outcome.  
24  
25  
26  
27  
28  
29  
30  
31  
32  
33  
34  
35  
36  
37  
38  
39  
40  
41  
42  
43  
44  
45  
46  
47  
48  
49  
50  
51  
52  
53  
54  
55  
56  
57  
58  
59  
60

388 Table 5. Categories relating to outcome acceptability and illustrative quotes.

|                                                                |                                                                                                                                                                                                                                                                                                                                                                                                                                                                                                                                                                                                                                                                                                                                                                                                                                                                                                                                                                                                                                                                                                                                                                                                                                                                                                                                                                                                                                                                                                                                                                                                                                                                                                                                                                                                                                                                                                                                                                                                                                                                                                                                                                                                                                                                                                                                                                                                                                                                                                                                                                           |                             |                                                                                                                                                                                                                                                                                   |                                                                |                                                                                                                                                                                                                                                                                                                                                                                                                                                                                                                                                                                    |                                |                                                                                                                                                                                                                                                                                                                                                                                                                                                                                                                                                                                                                                                                                                                                                                                                                                                                                                                                                                                                                                                                                                                                                                                                                                                            |
|----------------------------------------------------------------|---------------------------------------------------------------------------------------------------------------------------------------------------------------------------------------------------------------------------------------------------------------------------------------------------------------------------------------------------------------------------------------------------------------------------------------------------------------------------------------------------------------------------------------------------------------------------------------------------------------------------------------------------------------------------------------------------------------------------------------------------------------------------------------------------------------------------------------------------------------------------------------------------------------------------------------------------------------------------------------------------------------------------------------------------------------------------------------------------------------------------------------------------------------------------------------------------------------------------------------------------------------------------------------------------------------------------------------------------------------------------------------------------------------------------------------------------------------------------------------------------------------------------------------------------------------------------------------------------------------------------------------------------------------------------------------------------------------------------------------------------------------------------------------------------------------------------------------------------------------------------------------------------------------------------------------------------------------------------------------------------------------------------------------------------------------------------------------------------------------------------------------------------------------------------------------------------------------------------------------------------------------------------------------------------------------------------------------------------------------------------------------------------------------------------------------------------------------------------------------------------------------------------------------------------------------------------|-----------------------------|-----------------------------------------------------------------------------------------------------------------------------------------------------------------------------------------------------------------------------------------------------------------------------------|----------------------------------------------------------------|------------------------------------------------------------------------------------------------------------------------------------------------------------------------------------------------------------------------------------------------------------------------------------------------------------------------------------------------------------------------------------------------------------------------------------------------------------------------------------------------------------------------------------------------------------------------------------|--------------------------------|------------------------------------------------------------------------------------------------------------------------------------------------------------------------------------------------------------------------------------------------------------------------------------------------------------------------------------------------------------------------------------------------------------------------------------------------------------------------------------------------------------------------------------------------------------------------------------------------------------------------------------------------------------------------------------------------------------------------------------------------------------------------------------------------------------------------------------------------------------------------------------------------------------------------------------------------------------------------------------------------------------------------------------------------------------------------------------------------------------------------------------------------------------------------------------------------------------------------------------------------------------|
| <p>Perceptions of outcome assessments</p>                      | <ul style="list-style-type: none"> <li>• “It was a bit of a task, too many [outcomes] personally” (Male, mildly frail).</li> <li>• “It’s really helpful if it’s [outcome assessment] done here whilst I am on dialysis. We have got all this free time. Sometimes its five medical appointments a week, Tuesdays and Thursdays [non-dialysis days] become quite precious to me” (Male, vulnerable ).</li> <li>• “Do you mean someone would come to my house and do it [complete the functional tests]? I think that would be more doable.” (Female, moderately frail).</li> <li>• “The walking ones [tests] I could make the distance, but the time was ridiculous, they asked me to do it fast. I can’t, I have only got one speed” (Male, vulnerable).</li> <li>• “I am not very good at scores, or you know, what they say about pain, what number it is? I am no good at that. I don’t know what it means. I know it really hurts but I just can’t describe the extent of it. It’s difficult to put it in a number like that” (Female, vulnerable).</li> <li>• “Like all form filling, you can be undecided as to what or how to answer them. Sometimes you don’t, you kind of guess what you should be saying” (Male, mildly frail).</li> </ul>                                                                                                                                                                                                                                                                                                                                                                                                                                                                                                                                                                                                                                                                                                                                                                                                                                                                                                                                                                                                                                                                                                                                                                                                                                                                                                                      |                             |                                                                                                                                                                                                                                                                                   |                                                                |                                                                                                                                                                                                                                                                                                                                                                                                                                                                                                                                                                                    |                                |                                                                                                                                                                                                                                                                                                                                                                                                                                                                                                                                                                                                                                                                                                                                                                                                                                                                                                                                                                                                                                                                                                                                                                                                                                                            |
| <p>Important outcomes</p>                                      | <table border="1"> <tr> <td data-bbox="256 824 459 981"> <p>Maintaining mobility</p> </td> <td data-bbox="459 824 1473 981"> <ul style="list-style-type: none"> <li>• “If you are walking better you are not getting out of breath and that's what does me. I mean I can't walk down this corridor to the ambulance because I am having to stop and get my breath back” (Female, moderately frail).</li> </ul> </td> </tr> <tr> <td data-bbox="256 981 459 1272"> <p>Maintaining activities of daily living and social roles</p> </td> <td data-bbox="459 981 1473 1272"> <ul style="list-style-type: none"> <li>• “I don't want to walk miles I just want to do enough to get around...from my chair to my commode or from my commode onto the bed. The only way I can do that is with the rotunda at the minute. I would like to do it with my walking frame” (Female, moderately frail).</li> <li>• “I just want to carry on living and enjoying my life with my [partner] and children, my sisters, and of course all my friends, the church involvement, because I want to enjoy that for absolutely as long as I can” (Male, mildly frail).</li> </ul> </td> </tr> <tr> <td data-bbox="256 1272 459 1946"> <p>Falls and falls diaries</p> </td> <td data-bbox="459 1272 1473 1946"> <ul style="list-style-type: none"> <li>• “I don’t fall on a weekly basis... falling over is not something that happens on any sort of regular basis” (Male, moderately frail).</li> <li>• “When I was at the hospital, I told them I had a fall. They don’t want to know. They said, ‘you are perfect, your levels [bloods] are perfect and everything’.” (Male, vulnerable).</li> <li>• “You know I sometimes I forget [to write in the diary]. So, the first days I had written and then I forgot it. And when you forget it then you can’t get the information right.” (Male, severely frail).</li> <li>• “I can’t hold a pen properly, so I am not able to write. [Because of] arthritis they said, because I have got neuropathy and because I am on dialysis phosphate is causing my fingers to sometimes...close up.” (Male, moderately frail).</li> <li>• “If [the researcher is] opposite you and gives you the information, [they’re] going to explain it even better, you know [they] can even ask [the participant] what happened and then they explain to [the researcher] different. But you forget you know the diary it’s very difficult and some of [the participants] won’t ever to know how to use it” (Male, mildly frail).</li> </ul> </td> </tr> </table> | <p>Maintaining mobility</p> | <ul style="list-style-type: none"> <li>• “If you are walking better you are not getting out of breath and that's what does me. I mean I can't walk down this corridor to the ambulance because I am having to stop and get my breath back” (Female, moderately frail).</li> </ul> | <p>Maintaining activities of daily living and social roles</p> | <ul style="list-style-type: none"> <li>• “I don't want to walk miles I just want to do enough to get around...from my chair to my commode or from my commode onto the bed. The only way I can do that is with the rotunda at the minute. I would like to do it with my walking frame” (Female, moderately frail).</li> <li>• “I just want to carry on living and enjoying my life with my [partner] and children, my sisters, and of course all my friends, the church involvement, because I want to enjoy that for absolutely as long as I can” (Male, mildly frail).</li> </ul> | <p>Falls and falls diaries</p> | <ul style="list-style-type: none"> <li>• “I don’t fall on a weekly basis... falling over is not something that happens on any sort of regular basis” (Male, moderately frail).</li> <li>• “When I was at the hospital, I told them I had a fall. They don’t want to know. They said, ‘you are perfect, your levels [bloods] are perfect and everything’.” (Male, vulnerable).</li> <li>• “You know I sometimes I forget [to write in the diary]. So, the first days I had written and then I forgot it. And when you forget it then you can’t get the information right.” (Male, severely frail).</li> <li>• “I can’t hold a pen properly, so I am not able to write. [Because of] arthritis they said, because I have got neuropathy and because I am on dialysis phosphate is causing my fingers to sometimes...close up.” (Male, moderately frail).</li> <li>• “If [the researcher is] opposite you and gives you the information, [they’re] going to explain it even better, you know [they] can even ask [the participant] what happened and then they explain to [the researcher] different. But you forget you know the diary it’s very difficult and some of [the participants] won’t ever to know how to use it” (Male, mildly frail).</li> </ul> |
| <p>Maintaining mobility</p>                                    | <ul style="list-style-type: none"> <li>• “If you are walking better you are not getting out of breath and that's what does me. I mean I can't walk down this corridor to the ambulance because I am having to stop and get my breath back” (Female, moderately frail).</li> </ul>                                                                                                                                                                                                                                                                                                                                                                                                                                                                                                                                                                                                                                                                                                                                                                                                                                                                                                                                                                                                                                                                                                                                                                                                                                                                                                                                                                                                                                                                                                                                                                                                                                                                                                                                                                                                                                                                                                                                                                                                                                                                                                                                                                                                                                                                                         |                             |                                                                                                                                                                                                                                                                                   |                                                                |                                                                                                                                                                                                                                                                                                                                                                                                                                                                                                                                                                                    |                                |                                                                                                                                                                                                                                                                                                                                                                                                                                                                                                                                                                                                                                                                                                                                                                                                                                                                                                                                                                                                                                                                                                                                                                                                                                                            |
| <p>Maintaining activities of daily living and social roles</p> | <ul style="list-style-type: none"> <li>• “I don't want to walk miles I just want to do enough to get around...from my chair to my commode or from my commode onto the bed. The only way I can do that is with the rotunda at the minute. I would like to do it with my walking frame” (Female, moderately frail).</li> <li>• “I just want to carry on living and enjoying my life with my [partner] and children, my sisters, and of course all my friends, the church involvement, because I want to enjoy that for absolutely as long as I can” (Male, mildly frail).</li> </ul>                                                                                                                                                                                                                                                                                                                                                                                                                                                                                                                                                                                                                                                                                                                                                                                                                                                                                                                                                                                                                                                                                                                                                                                                                                                                                                                                                                                                                                                                                                                                                                                                                                                                                                                                                                                                                                                                                                                                                                                        |                             |                                                                                                                                                                                                                                                                                   |                                                                |                                                                                                                                                                                                                                                                                                                                                                                                                                                                                                                                                                                    |                                |                                                                                                                                                                                                                                                                                                                                                                                                                                                                                                                                                                                                                                                                                                                                                                                                                                                                                                                                                                                                                                                                                                                                                                                                                                                            |
| <p>Falls and falls diaries</p>                                 | <ul style="list-style-type: none"> <li>• “I don’t fall on a weekly basis... falling over is not something that happens on any sort of regular basis” (Male, moderately frail).</li> <li>• “When I was at the hospital, I told them I had a fall. They don’t want to know. They said, ‘you are perfect, your levels [bloods] are perfect and everything’.” (Male, vulnerable).</li> <li>• “You know I sometimes I forget [to write in the diary]. So, the first days I had written and then I forgot it. And when you forget it then you can’t get the information right.” (Male, severely frail).</li> <li>• “I can’t hold a pen properly, so I am not able to write. [Because of] arthritis they said, because I have got neuropathy and because I am on dialysis phosphate is causing my fingers to sometimes...close up.” (Male, moderately frail).</li> <li>• “If [the researcher is] opposite you and gives you the information, [they’re] going to explain it even better, you know [they] can even ask [the participant] what happened and then they explain to [the researcher] different. But you forget you know the diary it’s very difficult and some of [the participants] won’t ever to know how to use it” (Male, mildly frail).</li> </ul>                                                                                                                                                                                                                                                                                                                                                                                                                                                                                                                                                                                                                                                                                                                                                                                                                                                                                                                                                                                                                                                                                                                                                                                                                                                                                                                |                             |                                                                                                                                                                                                                                                                                   |                                                                |                                                                                                                                                                                                                                                                                                                                                                                                                                                                                                                                                                                    |                                |                                                                                                                                                                                                                                                                                                                                                                                                                                                                                                                                                                                                                                                                                                                                                                                                                                                                                                                                                                                                                                                                                                                                                                                                                                                            |

389 *Perceptions of a tailored exercise programme*390 *Delivery*

391 There was no universally acceptable setting for exercise delivery (Table 6). Vulnerable and  
392 mildly frail participants (CFS 4-5) were particularly open to group-based exercise in the  
393 community or gym, which they felt would provide motivation through camaraderie with  
394 others. However, access barriers due to HD treatment, complex health needs, and lack of  
395 transport were common. Participants also described feeling self-conscious exercising  
396 amongst 'normal' people. Home-based exercise was preferred by those with moderate to  
397 severe frailty (CFS 6-7) due to easier access, greater flexibility and relevance to their daily  
398 activities. Despite this, concerns about lack of space and safety were highlighted by those  
399 who lived alone, whilst those with family were concerned about overburdening or injuring  
400 them by asking for support.



401 Table 6. Participants perceptions of the facilitators and barriers to group and home-based exercise.

| Exercise setting                      | Facilitators                                                                                                                                                                                                                                                                                                                                                                                                                                                                                                                                                                                                                                                                     | Barriers                                                                                                                                                                                                                                                                                                                                                                                                                                                                                                                                                                                                                                                                                                                                                                                                                                                                |
|---------------------------------------|----------------------------------------------------------------------------------------------------------------------------------------------------------------------------------------------------------------------------------------------------------------------------------------------------------------------------------------------------------------------------------------------------------------------------------------------------------------------------------------------------------------------------------------------------------------------------------------------------------------------------------------------------------------------------------|-------------------------------------------------------------------------------------------------------------------------------------------------------------------------------------------------------------------------------------------------------------------------------------------------------------------------------------------------------------------------------------------------------------------------------------------------------------------------------------------------------------------------------------------------------------------------------------------------------------------------------------------------------------------------------------------------------------------------------------------------------------------------------------------------------------------------------------------------------------------------|
| Group community or gym-based exercise | <p>“There is something about the group dynamics, when you try and do it on your own and you can't really focus. It's just so much easier to do as a group than an individual, especially if you have got motivational problems and you're having to do this [dialysis]” (Male, vulnerable)</p> <p>“Better to be in a group, because when you see other people doing it, you just automatically join in and you feel like she can do it why not me?”(Female, mildly frail).</p> <p>“We are all in the same boat. You can say how are you going on this week, you know you are on dialysis, are you finding this OK and you can get notes from them” (Female, severely frail).</p> | <p>“I was lucky enough that my wife was off so she took me and brought me, otherwise transport was a problem, sometimes I used to take a taxi because hospital transport you can't trust it” (Male, moderately frail).</p> <p>“I have only got Tuesday and Thursday and most of the days that cropped up [to attend a falls prevention programme] they are either on a Wednesday or a Friday when I couldn't go because I have dialysis” (Male, mildly frail).</p> <p>“Apparently because of my complex problems and disabilities he [participants GP] doesn't think anyone at the gym is sufficiently qualified to tell me which exercises are best” (Female, moderately frail).</p> <p>“I would love to go to the gym and start sorting myself, but it's just a normal gym where normal keep-fit people go, so I have never ended up there” (Female, vulnerable).</p> |
| Home-based                            | <p>“When you are at home exercise is normal it really is. If you are going upstairs to get something you don't think...I am not going up there to get that. You go upstairs and get it because that's part of your everyday life” (Male, moderately frail).</p>                                                                                                                                                                                                                                                                                                                                                                                                                  | <p>“It's just the room that you have got where you can do exercise...if you haven't got that it's very difficult” (Female, moderately frail).</p> <p>“I can't do anything in the home. There is no-one there, I'm alone, what if anything happens?” (Male, mildly frail).</p> <p>“I am nervous about practising at home because if I couldn't get up, I don't want my husband hurting his back. I shall have to wait until a friend comes around and they could both help me” (Female, moderately frail).</p>                                                                                                                                                                                                                                                                                                                                                           |

1  
2  
3 403 *Characteristics of a tailored exercise programme*  
4

5 404 Irrespective of the setting for delivery, participants identified several key features of a  
6  
7 405 tailored exercise intervention which are summarised in Figure 2.  
8  
9

10  
11 406

12  
13 407 [FIGURE TWO. THE CORE COMPONENTS OF AN ACCEPTABLE EXERCISE  
14  
15 PROGRAMME FOR PEOPLE LIVING WITH FRAILITY AND RECEIVING  
16 408 HAEMODIALYSIS TO BE INSERTED HERE]  
17  
18 409

19  
20  
21 410 *Preparation*  
22

23 411 Participants lived with a range of debilitating symptoms, most frequently fatigue, pain and  
24  
25 412 dyspnoea. Often daily activity alone was felt to be enough of a challenge. Common impacts  
26  
27 413 of exercise (for example breathlessness whilst exercising) were interpreted as worsening  
28  
29 414 symptoms or damage, and many participants were uncertain if exercise would be suitable or  
30  
31 415 beneficial. They indicated that the reason for exercising needed to be sufficiently compelling.  
32  
33 416 They wanted to know what to expect prior to exercising, and individualised goal setting was  
34  
35 417 advocated to build motivation and appreciate improvements.  
36  
37  
38  
39

40 418

41  
42  
43 419 *Content*  
44

45 420 Key components described were whole body resistance, aerobic and balance training. Many  
46  
47 421 participants described being unable to get up once they had fallen and felt that practising this  
48  
49 422 was also important. Routine physical activity was viewed as more purposeful than structured  
50  
51 423 exercise 'for the sake of it' and participants spoke of their enjoyment of being outside and  
52  
53 424 engaging in meaningful and physically active hobbies.  
54  
55  
56

57  
58 425  
59  
60

1  
2  
3 426 *Structure*  
4

5 427 Supervision was viewed as essential to select, teach and progress exercises. Individual  
6  
7 428 tailoring which considered the impact of disability, comorbidities and fluctuating symptoms  
8  
9 429 was important, and a choice of exercises, for example swimming, dancing and yoga, was  
10  
11 430 associated with increased enjoyment and engagement. Moderate to severely frail participants  
12  
13 431 wanted the programme to be progressed in a supportive and collaborative manner. Those who  
14  
15 432 were vulnerable or mildly frail wanted to be ‘pushed’ and progressed in a more assertive  
16  
17 433 manner.  
18  
19  
20  
21

22 434  
23  
24  
25 435 Having a companion (typically peers, family or friends) was viewed as helping to overcome  
26  
27 436 access barriers and provide socialisation and mutual motivation. The sharing of experience  
28  
29 437 was also seen as a powerful means of challenging preconceptions about exercise ability,  
30  
31 438 although participants with moderate to severe frailty raised concerns about feeling  
32  
33 439 embarrassed or ‘judged’ if they were less able.  
34  
35  
36

37 440  
38  
39

40 441 **Integrated mixed-methods analyses**  
41

42  
43 442 The integrated qualitative and quantitative findings suggest that an RCT of IDC is feasible for  
44  
45 443 frail HD patients following adaptation. However, IDC should not be the only intervention  
46  
47 444 offered and the development of a multicomponent programme is warranted (Supplementary  
48  
49 445 material 11).  
50  
51

52 446  
53  
54

55  
56 447 **DISCUSSION**  
57  
58  
59  
60

1  
2  
3 448 These results suggest that an RCT of IDC is feasible for frail HD patients with adaptation to  
4  
5 449 increase outcome acceptability and eligibility rates. Adherence to IDC was high and it was  
6  
7 450 viewed as a safe and efficient use of HD treatment time. Secondary outcomes also suggest  
8  
9 451 that, for HD patients with a CFS of 4-7, IDC may mitigate deterioration in exercise capacity,  
10  
11 452 endurance and functional muscle strength and increase PA behaviour (steps/day), and reduce  
12  
13 453 falls incidence. Despite this, participants described a preference for a multi-component  
14  
15 454 programme that prepared them for exercise, offered variety, companionship and  
16  
17 455 individualised supervision. No single preferred environment for the delivery of this  
18  
19 456 intervention was identified, but appeared to be influenced by frailty grade and individual  
20  
21 457 factors.  
22  
23  
24  
25  
26 458  
27  
28  
29  
30 459 27% to 89% of secondary outcome measure data were missing, and, overall, this progression  
31  
32 460 criterion was not achieved. Given that secondary measures are often insufficiently powered,  
33  
34 461 reducing the number collected within a future trial may improve completion<sup>26</sup>. Falls were not  
35  
36 462 of primary importance to participants, and this aligns with SONG-HD data which did not  
37  
38 463 identify falls as a key outcome.<sup>27</sup> Our findings suggest that accurately capturing prospective  
39  
40 464 falls data may be challenging due to under-reporting, and yet, retrospective falls data  
41  
42 465 collection does not fully reflect the incidence and impact of falls, particularly those which do  
43  
44 466 not require an ED visit or hospital admission. Given the high incidence of falls in this  
45  
46 467 population, capturing falls data may be important in a future trial, and regular prospective  
47  
48 468 recording of information relating to falls as a part of routine practice at the dialysis unit is  
49  
50 469 recommended, in line with participant feedback.<sup>5</sup> This would provide both clinicians and  
51  
52 470 researchers with higher quality data for use in both prospective and retrospective studies, and  
53  
54 471 to inform clinical care.  
55  
56  
57  
58  
59  
60

1  
2  
3 472  
4  
5  
6 473 Further exploration and validation of meaningful measures for HD patients living with frailty  
7  
8 474 is also warranted. Some of the functional measures (the STS60 and ISWT) included were too  
9  
10 475 challenging. In the absence of a core set of functional outcome measures for older people, or  
11  
12 476 people receiving haemodialysis, we suggest that the SPPB may be the most appropriate and  
13  
14 477 feasible method of capturing information about mobility and function. Although challenges  
15  
16 478 with ceiling effects have been identified, this measure had the lowest levels of non-  
17  
18 479 completion within this study, and has demonstrated good test-retest reliability in HD patients  
19  
20 480 and excellent validity and responsiveness to change following an intervention in older adults.  
21  
22 481 <sup>28,29</sup> To date, measures of basic and instrumental ADL ability and participation have rarely  
23  
24 482 been used in exercise studies in an HD population. These outcomes were, however,  
25  
26 483 highlighted as important within this study, and have also been included in guidelines and core  
27  
28 484 outcomes sets for HD and older people, warranting their inclusion in future exercise studies  
29  
30 485 relating to frail HD populations.<sup>27,30,31</sup>  
31  
32  
33  
34  
35  
36  
37  
38  
39  
40  
41  
42  
43  
44  
45  
46  
47  
48  
49  
50  
51  
52  
53  
54  
55  
56  
57  
58  
59  
60

486  
487 The results of this study indicate that changes to eligibility criteria and screening processes  
488 are required. As only patient participants were interviewed, it was not possible to gain any  
489 insight on this aspect of feasibility from the qualitative component. Importantly, the  
490 challenges of identifying eligible participants do not appear to be unique to this study and a  
491 multicentre trial may be required.<sup>32</sup>

492  
493 Higher proportions of older, female and more severely frail HD patients declined to participate  
494 and the qualitative data indicated this was due to negative perceptions relating to participation  
495 in both exercise and research. Such findings clearly have implications for the external validity

1  
2  
3 496 of a future trial and the reach of the intervention at the point of implementation.<sup>24</sup> To address  
4  
5 497 this, this study suggests recruitment strategies which utilise effective non-verbal  
6  
7 498 communication skills to build rapport and explore participants' perceptions of the  
8  
9 499 intervention and the research process, and subsequently provide balanced information about  
10  
11 500 the study, may lead to more representative recruitment. A sense of equipoise may be  
12  
13 501 preserved by emphasising altruism, access to potentially enhanced care, and an opportunity to  
14  
15 502 learn about their health (which were all identified as motivators to participation), rather than  
16  
17 503 the potential individual benefits of the intervention itself. Involving families and/or peer  
18  
19 504 supporters who have experience of the study and intervention in the recruitment process and  
20  
21 505 introducing opportunities for participants to observe the exercise intervention may also be  
22  
23 506 beneficial. Ultimately the selection of these strategies will depend upon the resources  
24  
25 507 available and the need to strike a balance between conducting a trial with high internal and  
26  
27 508 external validity and going beyond what is pragmatically possible to engage patients in the  
28  
29 509 intervention at the implementation phase.  
30  
31  
32  
33  
34  
35  
36  
37  
38

39 511 This study suggests that IDC may reduce the incidence of falls resulting in ED visits and  
40  
41 512 hospital admissions in frail HD patients potentially by attenuating a decline in exercise  
42  
43 513 capacity, physical activity behaviour and function at levels shown to be clinically meaningful  
44  
45 514 in other long-term conditions.<sup>33,34</sup> This indicates that preventing deterioration may be as  
46  
47 515 valuable, and more attainable, as improving outcomes in a frail population. Despite this, frail  
48  
49 516 participants experienced difficulties achieving the proposed level of exercise and maintaining  
50  
51 517 motivation in the face of varying symptomology. Exercise programmes have a dose-response,  
52  
53 518 and these factors may have reduced participants physical capability to exercise and achieve  
54  
55 519 optimal benefit, despite the overall good level of adherence. Clinical decision support tools  
56  
57 520 have been used in other populations to rationalise exercise prescription, progression and  
58  
59  
60

1  
2  
3 521 amendment in the presence of varying symptomology, and a similar approach may be  
4  
5 522 beneficial for frail HD patients.<sup>35</sup>  
6  
7  
8  
9 523

10  
11 524 This study indicates that participants desire a multicomponent exercise programme, and  
12  
13 525 require an intervention that addresses their particularly low levels of PA. Whilst step count  
14  
15 526 and time spent in light and moderate PA increased following IDC, these were below PA  
16  
17 527 recommendations for older people.<sup>36</sup> To date, PA interventions for HD patients have  
18  
19 528 predominantly centred around walking, which may not be appropriate for those living with  
20  
21 529 frailty.<sup>37-40</sup> This study suggests that functional training (task-orientated exercise which  
22  
23 530 engages multiple muscle groups) and physical activity that focuses on ‘doing more’ of these  
24  
25 531 usual tasks may be more acceptable and efficacious. To date, two studies have employed  
26  
27 532 similar approaches with non-frail HD patients. One study demonstrated significant  
28  
29 533 improvements in lower extremity performance and the other a non-significant improvement  
30  
31 534 in physical function and maintenance of other SF-36 domains compared with the control  
32  
33 535 group<sup>41,42</sup>. In older people without CKD who are living with frailty, functional training  
34  
35 536 included as part of a multicomponent exercise programme is beneficial across a range of  
36  
37 537 outcomes, including greater ability to rise from the floor following a fall.<sup>40,43-46</sup> A similar  
38  
39 538 approach to exercise prescription may be warranted in a frail HD population.  
40  
41  
42  
43  
44  
45  
46  
47  
48

49 540 Numerous barriers and facilitators to exercise were identified within this study, which have  
50  
51 541 implications for the design of a programme. The use of theory is crucial in the development  
52  
53 542 of effective interventions and the behaviour change wheel (BCW) is most frequently cited in  
54  
55 543 the development of interventions in CKD.<sup>47</sup> Mapping the identified barriers and facilitators  
56  
57 544 to the BCW indicates that ameliorating symptom burden prior to exercise, individualised  
58  
59  
60

1  
2  
3 545 exercise counselling, and a collaborative, problem-solving approach to exercise education are  
4  
5 546 most likely to encourage and sustain participation.<sup>47,48</sup> Devising ways in which peer and  
6  
7 547 family involvement can be incorporated into the programme may also increase motivation  
8  
9 548 and opportunity to exercise but should be carefully managed given the potential for negative  
10  
11 549 comparison amongst the frailest patients.  
12  
13  
14

15 550

16  
17  
18 551 A lack of preferred environment for intervention delivery may have implications for a  
19  
20 552 definitive RCT. Exercise interventions require motivation, and limited engagement may  
21  
22 553 negatively influence a trials external and internal validity. Ignoring patient preference is also  
23  
24 554 out of step with clinical practice, where rehabilitation involves shared decision-making.  
25  
26 555 Taken together, these factors have implications for determining treatment effects and future  
27  
28 556 intervention implementation.<sup>49</sup> There is increasing recognition that novel trial designs may be  
29  
30 557 indicated when evaluating complex interventions and a Partially Randomised Patient  
31  
32 558 Preference Trial, where participants without preference are randomised whilst those with a  
33  
34 559 preference receive their choice, would provide information on both the efficacy of the  
35  
36 560 intervention and the influence of preference.<sup>49,50</sup>  
37  
38  
39  
40  
41

42 561

## 43 44 45 562 **Strengths and limitations**

46  
47  
48 563 To our knowledge, this study is the first to examine the feasibility of an RCT of IDC for frail  
49  
50 564 HD patients and to explore how trial procedures and exercise programmes should be  
51  
52 565 specifically tailored to the needs of this group, from their own perspectives. Key strengths  
53  
54 566 were the use of a validated frailty risk-stratification measure and multiple qualitative methods  
55  
56 567 which provided a form of triangulation.<sup>51</sup> There were, however, challenges to recruiting  
57  
58 568 severely frail participants, and those from a more diverse range of black and minority ethnic  
59  
60



1  
2  
3 569 groups, to both the trial and the qualitative study. Additionally, the views of clinicians and  
4  
5 570 researchers were not explored. A future RCT should also blind outcome assessors to group  
6  
7 571 allocation to reduce the potential for detection bias. Finally, this study is exploratory and  
8  
9 572 therefore all secondary measures of exercise capacity, function and PROMS should be  
10  
11 573 interpreted with caution, not least due to the high number of participants who did not  
12  
13 574 complete the follow up tests.  
14  
15  
16  
17  
18 575

## 20 576 **Conclusion**

23 577 In summary, this study suggests that a future definitive trial of IDC is feasible within a HD  
24  
25 578 population with a CFS of 4-7 and paying particular attention in the design to those factors  
26  
27 579 mentioned above may facilitate improved rates of eligibility and outcome completion.  
28  
29 580 Outcomes focusing on independence and participation should be the primary outcomes of  
30  
31 581 interest in a future trial. Whilst an exploratory analysis suggests some potential benefits to  
32  
33 582 IDC, a tailored intervention comprising a comprehensive multi-component exercise  
34  
35 583 programme, symptom management, education and behaviour change is better suited to frail  
36  
37 584 HD patients' needs.  
38  
39  
40  
41  
42  
43 585

## 45 586 **ACKNOWLEDGEMENTS**

48 587 The authors would like to thank the staff and patients at all units, Fresenius Medical Care and  
49  
50 588 The Leicester Kidney Care Appeal. The authors also wish to thank Freya Tyrer for sharing her  
51  
52 589 statistical expertise.  
53  
54  
55  
56 590

## 58 591 **COMPETING INTERESTS**

1  
2  
3 592 The authors have no conflicts of interest to declare.  
4  
5

6 593  
7  
8

9 594 **FUNDING**  
10  
11

12 595 The work was funded by the National Institute for Health Research (NIHR) Leicester  
13

14 596 Biomedical Research Centre, Collaboration for Leadership in Applied Health Research and  
15

16 597 Care East Midlands (CLAHRC EM) and partly funded by the Stoneygate Trust. H.M.L.Y.  
17

18 598 and J.O.B. are supported by grants from the NIHR (DRF-2016-09-015 and CS-2013-13-014).  
19

20 599 S.J.S. is supported by the Collaboration for Leadership in Applied Health Research and Care  
21

22 600 East Midlands. The views expressed in this publication are those of the authors and not  
23

24 601 necessarily those of the NHS, the NIHR or the Department of Health and Social Care. The  
25

26 602 funders had no role in the study design; collection, analysis, and interpretation of the data;  
27

28 603  
29  
30  
31

32 604 **AUTHORS CONTRIBUTIONS**  
33  
34

35 605 Literature search: HMLY; Research idea and study design: HMLY, JOB; participant  
36

37 606 recruitment: HMLY, DS, PH, DC, MPMGB, JOB, CG; data acquisition: HMLY, DS,PH,DC,  
38

39 607 MPMGB,CG WJ, MC; clinical governance: JOB; data analysis: HMLY, SG; statistical  
40

41 608 analysis: HMLY; supervision and mentorship: SC, HE, SG, SJS, ACS, JOB; manuscript  
42

43 609 preparation: HMLY; reviewed final manuscript: all. Each author contributed important  
44

45 610 intellectual content during manuscript drafting or revision and accepts accountability for the  
46

47 611 overall work by ensuring that questions pertaining to the accuracy or integrity of any portion  
48

49 612 of the work are appropriately investigated and resolved. All authors have read and approved  
50

51 613 the final version  
52  
53  
54  
55

56 614  
57  
58  
59  
60

1  
2  
3 **615 ETHICAL APPROVAL**  
4

5  
6 616 This study was approved by the East Midlands (Northampton; REC ref: 14/EM/1190) and  
7

8 617 South West (Bristol; REC ref: 17/SW/0048) NHS Research Ethics Committees for the trial  
9

10 618 and the qualitative component respectively  
11  
12

13  
14 619

15  
16 **620 DATA SHARING STATEMENT**  
17

18  
19 621 The datasets used and analysed during the current study are available from the corresponding  
20

21 622 author on reasonable request.  
22  
23  
24  
25  
26  
27  
28  
29  
30  
31  
32  
33  
34  
35  
36  
37  
38  
39  
40  
41  
42  
43  
44  
45  
46  
47  
48  
49  
50  
51  
52  
53  
54  
55  
56  
57  
58  
59  
60

623 **REFERENCES**

- 624 1. Clegg A, Young J, Iliffe S, et al. Frailty in elderly people. *The Lancet*.  
625 2013;381(9868):752-762.
- 626 2. Zhao Y, Liu Q, Ji J. The prevalence of frailty in patients on hemodialysis: A systematic  
627 review and meta-analysis. *Int Urol Nephrol*. 2019:1-6.
- 628 3. Iyasere OU, Brown EA, Johansson L, et al. Quality of life and physical function in older  
629 patients on dialysis: A comparison of assisted peritoneal dialysis with hemodialysis. *Clin J*  
630 *Am Soc Nephrol*. 2016;11(3):423-430.
- 631 4. Johansen KL, Chertow GM, Jin C, et al. Significance of frailty among dialysis patients.  
632 *Journal of the American Society of Nephrology*. 2007;18(11):2960-2967.
- 633 5. López-Soto PJ, De Giorgi A, Senno E, et al. Renal disease and accidental falls: A review  
634 of published evidence. *BMC nephrology*. 2015;16(1):176.
- 635 6. Johansen KL, Dalrymple LS, Delgado C, et al. Factors associated with frailty and its  
636 trajectory among patients on hemodialysis. *Clinical Journal of the American Society of*  
637 *Nephrology*. 2017;12(7):1100-1108.
- 638 7. Wang CJ, Johansen KL. Are dialysis patients too frail to exercise? Seminars in  
639 dialysis.2019;32(4) 1-6.
- 640 8. Young HM, March DS, Graham-Brown MP, et al. Effects of intradialytic cycling exercise  
641 on exercise capacity, quality of life, physical function and cardiovascular measures in adult  
642 haemodialysis patients: A systematic review and meta-analysis. *Nephrology Dialysis*  
643 *Transplantation*. 2018; 33(8),1436-1445.

- 1  
2  
3 644 9. Brown EA. Can quality of life be improved for the increasing numbers of older patients  
4  
5 645 with end-stage kidney disease? *Expert review of pharmacoeconomics & outcomes research*.  
6  
7 646 2010;10(6):661-666.  
8  
9  
10  
11 647 10. Farrington K, Covic A, Nistor I, et al. Clinical practice guideline on management of older  
12  
13 648 patients with chronic kidney disease stage 3b or higher (eGFR < 45 mL/min/1.73 m<sup>2</sup>): A  
14  
15 649 summary document from the european renal best practice group. *Nephrology Dialysis*  
16  
17 650 *Transplantation*. 2017;32(1):9-16.  
18  
19  
20  
21 651 11. Graham-Brown M, March DS, Churchward DR, et al. Design and methods of CYCLE-  
22  
23 652 HD: Improving cardiovascular health in patients with end stage renal disease using a  
24  
25 653 structured programme of exercise: A randomised control trial. *BMC nephrology*.  
26  
27 654 2016;17(1):69.  
28  
29  
30  
31  
32 655 12. Charmaz K. Constructing grounded theory (introducing qualitative methods series). 2nd  
33  
34 656 edn. London: Sage Publications 2014.  
35  
36  
37  
38 657 13. Nixon AC, Bampouras TM, Pendleton N, et al. Diagnostic accuracy of frailty screening  
39  
40 658 methods in advanced chronic kidney disease. *Nephron*. 2019;141(3):147-155.  
41  
42  
43  
44 659 14. Rockwood K, Song X, MacKnight C, et al. A global clinical measure of fitness and frailty  
45  
46 660 in elderly people. *CMAJ*. 2005;173(5):489-495.  
47  
48  
49  
50 661 15. Alfaadhel TA, Soroka SD, Kiberd BA, et al. Frailty and mortality in dialysis: Evaluation  
51  
52 662 of a clinical frailty scale. *Clin J Am Soc Nephrol*. 2015;10(5):832-840.  
53  
54  
55  
56 663 16. Hoffmann TC, Glasziou PP, Boutron I, et al. Better reporting of interventions: Template  
57  
58 664 for intervention description and replication (TIDieR) checklist and guide. *BMJ*.  
59  
60 665 2014;348:g1687.

- 1  
2  
3 666 17. Borg GA. Psychophysical bases of perceived exertion. *Med Sci Sports Exerc.*  
4  
5 667 1982;14(5):377-381.  
6  
7  
8  
9 668 18. Sim J, Lewis M. The size of a pilot study for a clinical trial should be calculated in  
10  
11 669 relation to considerations of precision and efficiency. *J Clin Epidemiol.* 2012;65(3):301-308.  
12  
13  
14  
15 670 19. Young HML, Goodliffe S, Madhani M, et al. Co-producing progression criteria for  
16  
17 671 feasibility studies: A partnership between patient contributors, clinicians and researchers.  
18  
19 672 *International journal of environmental research and public health.* 2019;16(19):3756.  
20  
21  
22  
23 673 20. Avery KN, Williamson PR, Gamble C, et al. Informing efficient randomised controlled  
24  
25 674 trials: Exploration of challenges in developing progression criteria for internal pilot studies.  
26  
27 675 *BMJ open.* 2017;7(2):e013537.  
28  
29  
30  
31 676 21. Beddhu S, Bruns FJ, Saul M, et al. A simple comorbidity scale predicts clinical outcomes  
32  
33 677 and costs in dialysis patients. *Am J Med.* 2000;108(8):609-613.  
34  
35  
36  
37 678 22. Lamb SE, Jørstad-Stein EC, Hauer K, et al. Development of a common outcome data set  
38  
39 679 for fall injury prevention trials: The prevention of falls network europe consensus. *J Am*  
40  
41 680 *Geriatr Soc.* 2005;53(9):1618-1622.  
42  
43  
44  
45 681 23. Young HML, Orme MW, Song Y, et al. Standardising the measurement of physical  
46  
47 682 activity in people receiving haemodialysis: Considerations for research and practice. *BMC*  
48  
49 683 *nephrology.* 2019;20(1):450.  
50  
51  
52  
53 684 24. Eldridge SM, Chan CL, Campbell MJ, et al. CONSORT 2010 statement: Extension to  
54  
55 685 randomised pilot and feasibility trials. *Pilot and feasibility studies.* 2016;2(1):64.  
56  
57  
58  
59  
60

- 1  
2  
3 686 25. Richards DA, Bazeley P, Borglin G, et al. Integrating quantitative and qualitative data  
4  
5 687 and findings when undertaking randomised controlled trials. *BMJ open*. 2019;9(11).  
6  
7  
8  
9 688 26. Witham MD, Stott DJ. Conducting and reporting trials for older people. *Age Ageing*.  
10  
11 689 2017;46(6):889-894.  
12  
13  
14  
15 690 27. SONG initiative. Standardised outcomes in nephrology - haemodialysis.  
16  
17 691 <http://songinitiative.org/projects/song-hd/>. Updated 2017. Accessed July, 2019.  
18  
19  
20  
21 692 28. Lamb SE, Keene DJ. Measuring physical capacity and performance in older people. *Best*  
22  
23 693 *Practice & Research Clinical Rheumatology*. 2017;31(2):243-254.  
24  
25  
26 694 29. de Villar LO, Martínez-Olmos FJ, Junqué-Jiménez A, et al. Test-retest reliability and  
27  
28 695 minimal detectable change scores for the short physical performance battery, one-legged  
29  
30 696 standing test and timed up and go test in patients undergoing hemodialysis. *PloS one*.  
31  
32 697 2018;13(8):e0201035.  
33  
34  
35  
36 698 30. Akpan A, Roberts C, Bandeen-Roche K, et al. Standard set of health outcome measures  
37  
38 699 for older persons. *BMC geriatrics*. 2018;18(1):36.  
39  
40  
41  
42 700 31. Matsufuji S, Shoji T, Yano Y, et al. Effect of chair stand exercise on activity of daily  
43  
44 701 living: A randomized controlled trial in hemodialysis patients. *Journal of Renal Nutrition*.  
45  
46 702 2015;25(1):17-24.  
47  
48  
49  
50 703 32. Ferrucci L, Guralnik JM, Studenski S, Fried LP, Cutler Jr GB, Walston JD, Interventions  
51  
52 704 on Frailty Working Group. Designing randomized, controlled trials aimed at preventing or  
53  
54 705 delaying functional decline and disability in frail, older persons: a consensus report. *Journal*  
55  
56 706 *of the American Geriatrics Society*. 2004 Apr;52(4):625-34.  
57  
58  
59  
60

- 1  
2  
3 707 33. Yates T, Gray LJ, Henson J, et al. Impact of depression and anxiety on change to physical  
4  
5 708 activity following a pragmatic diabetes prevention program within primary care: Pooled  
6  
7 709 analysis from two randomized controlled trials. *Diabetes Care*. 2019;42(10):1847-1853.  
8  
9  
10  
11 710 34. Zatloukal J, Houchen-Wolloff L, Ward S, et al. Clinical significance for ESWT in COPD  
12  
13 711 after a course of pulmonary rehabilitation. *Chro Respiratory*  
14  
15 712 *Disease*.2015;46.1479973119853828  
16  
17  
18  
19 713 35. Carvalho LP, Kergoat M, Bolduc A, et al. A systematic approach for prescribing  
20  
21 714 posthospitalization home-based physical activity for mobility in older adults: The PATH  
22  
23 715 study. *Journal of the American Medical Directors Association*. 2019;20(10):1287-1293.  
24  
25  
26  
27 716 36. Department of Health. Physical activity guidelines for older adults.  
28  
29 717 <https://www.nhs.uk/live-well/exercise/physical-activity-guidelines-older-adults/>. Updated  
30  
31 718 2019. Accessed April, 2020.  
32  
33  
34  
35 719 37. Baggetta R, D'Arrigo G, Torino C, et al. Effect of a home based, low intensity, physical  
36  
37 720 exercise program in older adults dialysis patients: A secondary analysis of the EXCITE trial.  
38  
39 721 *BMC geriatrics*. 2018;18(1):248.  
40  
41  
42  
43 722 38. Bohm C, Stewart K, Onyskie-Marcus J, Esliger D, et al. Effects of intradialytic cycling  
44  
45 723 compared with pedometry on physical function in chronic outpatient hemodialysis: A  
46  
47 724 prospective randomized trial. *Nephrology Dialysis Transplantation*. 2014;29(10):1947-1955.  
48  
49  
50  
51 725 39. Sheshadri A, Kittiskulnam P, Lazar AA, et al. A walking intervention to increase weekly  
52  
53 726 steps in dialysis patients: A pilot randomized controlled trial. *American Journal of Kidney*  
54  
55 727 *Diseases*. 2020; 75(4):488-496  
56  
57  
58  
59  
60



- 1  
2  
3 728 40. de Labra C, Guimaraes-Pinheiro C, Maseda A, et al. Effects of physical exercise  
4  
5 729 interventions in frail older adults: A systematic review of randomized controlled trials. *BMC*  
6  
7 730 *geriatrics*. 2015;15(1):1.  
8  
9  
10  
11 731 41. Tawney KW, Tawney PJ, Hladik G, et al. The life readiness program: A physical  
12  
13 732 rehabilitation program for patients on hemodialysis. *American journal of kidney diseases*.  
14  
15 733 2000;36(3):581-591.  
16  
17  
18  
19 734 42. Bogataj Š, Pajek J, Ponikvar JB, et al. Kinesiologist-guided functional exercise in  
20  
21 735 addition to intradialytic cycling program in end-stage kidney disease patients: A randomised  
22  
23 736 controlled trial. *Scientific reports*. 2020;10(1):1-10.  
24  
25  
26  
27 737 43. Hofmeyer MR, Alexander NB, Nyquist LV, et al. Floor-Rise strategy training in older  
28  
29 738 adults. *J Am Geriatr Soc*. 2002;50(10):1702-1706.  
30  
31  
32  
33 739 44. Skelton DA, McLaughlin AW. Training functional ability in old age. *Physiotherapy*.  
34  
35 740 1996;82(3):159-167.  
36  
37  
38  
39 741 45. Giné-Garriga M, Roqué-Fíguls M, Coll-Planas L, et al. Physical exercise interventions for  
40  
41 742 improving performance-based measures of physical function in community-dwelling, frail  
42  
43 743 older adults: A systematic review and meta-analysis. *Arch Phys Med Rehabil*.  
44  
45 744 2014;95(4):753-769. e3.  
46  
47  
48  
49 745 46. Liu C, Shiroy DM, Jones LY, et al. Systematic review of functional training on muscle  
50  
51 746 strength, physical functioning, and activities of daily living in older adults. *European review*  
52  
53 747 *of aging and physical activity*. 2014;11(2):95.  
54  
55  
56  
57  
58  
59  
60

- 1  
2  
3 748 47. Clarke AL, Jhamb M, Bennett P. Barriers and facilitators for engagement and  
4  
5 749 implementation of exercise in end-stage kidney disease: Future theory-based interventions  
6  
7 750 using the behavior change wheel. *Seminars in Dialysis*. 2019:1-12.  
8  
9  
10  
11 751 48. Michie S, Atkins L, West R. The behaviour change wheel. *A guide to designing*  
12  
13 752 *interventions. 1st ed. Great Britain: Silverback Publishing*. 2014:1003-1010.  
14  
15  
16  
17 753 49. Wasmann KA, Wijsman P, van Dieren S, et al. Partially randomised patient preference  
18  
19 754 trials as an alternative design to randomised controlled trials: Systematic review and meta-  
20  
21 755 analyses. *BMJ open*. 2019;9(10):e031151.  
22  
23  
24  
25 756 50. Craig P, Dieppe P, Macintyre S, et al. Developing and evaluating complex interventions:  
26  
27 757 The new medical research council guidance. *BMJ*. 2008;337:a1655.  
28  
29  
30  
31 758 51. Tracy SJ. Qualitative quality: Eight “big-tent” criteria for excellent qualitative research.  
32  
33 759 *Qualitative inquiry*. 2010;16(10):837-851.  
34  
35  
36 760 Legends to Figures  
37  
38  
39 761 Figure 1. CONSORT  
40  
41  
42 762 Figure 2. The core components of an acceptable exercise programme for people living with  
43  
44 763 frailty and receiving haemodialysis.  
45  
46  
47 764  
48  
49  
50  
51 765 **SUPPLEMENTARY MATERIAL**  
52  
53  
54 766 Supplementary material 1. Inclusion and exclusion criteria for the CYCLE-HD trial  
55  
56 767 Supplementary material 2. Summary of intervention characteristics, in line with TiDier  
57  
58 768 guidance.  
59  
60

- 1  
2  
3 769 Supplementary material 3. *A priori* progression criteria based on the primary feasibility  
4  
5 770 objectives.  
6  
7  
8 771 Supplementary material 4. Patient-reported secondary outcome measures.  
9  
10  
11 772 Supplementary material 5. Interview topic guide questions.  
12  
13  
14 773 Supplementary material 6. Falls summary data and incidence of falls per person years.  
15  
16 774 Supplementary material 7. Changes in exercise capacity and physical function after six  
17  
18 775 months.  
19  
20  
21 776 Supplementary material 8. Changes in physical activity (accelerometry data) after six months.  
22  
23  
24 777 Supplementary material 9. Patient-reported outcomes measures after six months.  
25  
26  
27 778 Supplementary material 10. Baseline demographic and clinical characteristics for the  
28  
29 779 qualitative participants.  
30  
31  
32 780 Supplementary material 11. Joint display of quantitative and qualitative results, with an  
33  
34 781 overall assessment of mixed-methods inferences.  
35  
36  
37  
38  
39  
40  
41  
42  
43  
44  
45  
46  
47  
48  
49  
50  
51  
52  
53  
54  
55  
56  
57  
58  
59  
60



Abbreviations: Ax, assessment; CFS, Clinical Frailty Scale; HD, haemodialysis.

Preparation for exercise

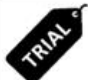

**Trial of exercise**

"I would like to know what they expected you to do and err ... instead of going and knowing you can't do it and wasting your time" (Female, moderately frail).

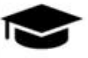

**Education and awareness**

"You ought to tell them... the goodness in [exercising]... Explain that dialysis takes its toll on your body...so to make sure you are still on the... move you have to do exercises" (Male, moderately frail).

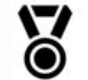

**Addressing motivation**

"You need a goal, otherwise you might think sod it, I will just give up. But if I got really into it and it was doing me good and I can see the improvement and feel the improvement then yes" (Female, moderately frail).

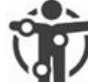

**Addressing symptoms**

"When you are getting pain... you can't control, you don't want to do anything. You have got enough pain...and you don't want to create more." (Male, moderately frail).

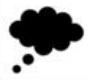

**Challenging perceptions**

"No now I can't [exercise], I'm older you see now. I can't manage it, I get very tired you even walking from one room to another, I can't" (Female, mildly frail).

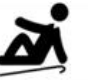

**Getting up from the floor**

"I am down on the floor I can't get up because... I have not got the strength in my legs or my arms to push myself up. I could probably crawl and try and pull myself up on a chair...but that's the only way. Urm .. if you asked me to get down on my knees and I have got one arm I couldn't get up, I would have to use elbows to get up. I just haven't got the strength in my hands and in my legs... to push." (Female, severely frail).

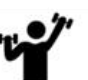

**Resistance exercises**

"I can't do much with [my arm], at one point I used to be able to lift my arm right up like I do with this one. But because I have got arthritis in my shoulder it's more difficult. I can still do something with it, things I used to be able to do like holding a potato when I am peeling it I can still do that but I rarely often do it. I think it's because I can't get, I have not got the grip as much...I could get a bit more strength in my left hand, in my left arm" (Female, moderately frail).

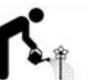

**Activities of daily living and physically active hobbies**

"I don't think I would want to commit to going to the gym or anything like that, but I walk around shopping and [the local supermarket]...is bigger than the one [where I previously lived]" (Male, mildly frail).

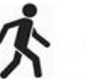

**Aerobic exercise**

"What you are doing on a daily basis has a purpose. Because you definitely do everything, whatever you are doing...for a purpose. There is an end result." (Male, moderately frail).

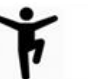

**Balance exercise**

"The balance is definitely a good thing because that is something that is a problem for me." (Female, vulnerable).

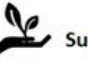

**Support**

"I think when you have got somebody who knows the exercises...plus if you are not doing it quite right he can say no you should be balanced that way" (Female, mildly frail).

"If like I say I am struggling with this urm...they will let's go back a little bit for that exercise and we will build it back up again" (Female, severely frail).

"As long as whoever was going to do it could sort of empathise with people who are having the difficulties would be OK. I am like 'I have got loads of problems and you don't have it so you don't know' right?" (Female, vulnerable).

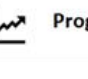

**Progression**

"It's not going to be like you do it one day and you're going to conquer the whole thing. It's going to take time, it's going to take a couple of...months you know...slowly, slowly, you know" (Male, vulnerable).

"They have got to push you a little bit, yeah OK they can supervise you and suggest things, but I would like it to be more active. I think sometimes that takes... a bit of a sergeant major type to push things beyond what you were comfortable with" (Male, vulnerable).

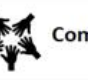

**Companionship**

"I think everyone would be able to share different things. Someone could say something and somebody would go 'oh yeah!' Sometimes something that you say surprises someone else when you say it." (Female, vulnerable).

"You don't want to fall because someone will pick you up and that will be embarrassing. It's going to be very hard for me to not bother about them [others exercising]. What are they thinking?" (Female, severely frail).

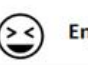

**Enjoyment**

"People need to be in the same boat. A thing that comes to me is taking account of people's disabilities, maybe not everyone is at the same level" (Female, moderately frail).

"If someone makes exercise fun I think that makes all the difference." (Female, moderately frail).

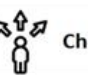

**Choice**

"Ask what exercise would you like to do. If you asked them they would probably turn around and say well I want to go on the treadmill or someone will say I will do cycling and some of them might give up on it" (Male, moderately frail).

Content of the exercise programme

Structure of the programme

Supplementary material 1. Inclusion and exclusion criteria for the *CYCLE-HD* trial.

| Inclusion criteria                        | Exclusion criteria                                                                                      |
|-------------------------------------------|---------------------------------------------------------------------------------------------------------|
| Prevalent HD patient (> three months)     | Unable to participate in current exercise programme due to perceived physical or psychological barriers |
| Aged 18 years or older                    | Unable to undergo MRI scanning (metal implants, severe claustrophobia)                                  |
| Able and willing to give informed consent | Unfit to undertake exercise according to the American College of Sports Medicine (ACSM) guidelines      |

Supplementary material 2. Summary of intervention characteristics, in line with TiDier guidance.

|                                      |                                                                              |                                                                                                                                                                                                                                                                                                                                                                                                                                                     |
|--------------------------------------|------------------------------------------------------------------------------|-----------------------------------------------------------------------------------------------------------------------------------------------------------------------------------------------------------------------------------------------------------------------------------------------------------------------------------------------------------------------------------------------------------------------------------------------------|
| <b>Description of intervention.</b>  |                                                                              | A structured, supervised cycling exercise intervention delivered during in-centre HD.                                                                                                                                                                                                                                                                                                                                                               |
| <b>Rationale.</b>                    |                                                                              | <ul style="list-style-type: none"> <li>Intradialytic cycling provides aerobic and low-level resistance training, is associated with increased adherence and is most widely used within practice.</li> </ul>                                                                                                                                                                                                                                         |
| <b>What.</b>                         | Materials provided to participants or used to support intervention delivery. | <ul style="list-style-type: none"> <li>Cycling was delivered using the Moto Med Letto 2 (Medimotion Ltd).</li> <li>Materials: individualised exercise prescription and records of individual training bouts (duration (mins), intensity (RPE), resistance (gear), power output (watts) and energy expenditure (Kcal).</li> <li>General information on the benefits of exercise (posters and leaflets) available across all 3 HD centres.</li> </ul> |
|                                      | Materials used to train intervention providers.                              | Standardised progression and training protocol used by all providers.                                                                                                                                                                                                                                                                                                                                                                               |
| <b>Who</b> (intervention providers). |                                                                              | <ul style="list-style-type: none"> <li>Qualified exercise professionals with experience of delivering exercise to renal patients.</li> <li>All providers were directly involved in the study, and not delivering the sessions as part of a clinical role.</li> <li>Roles included exercise provision, supervision, monitoring and progression.</li> </ul>                                                                                           |
| <b>How</b> (mode of delivery).       |                                                                              | One to one, face to face.                                                                                                                                                                                                                                                                                                                                                                                                                           |
| <b>Where</b> (location).             |                                                                              | Three HD units across the East Midlands, UK.                                                                                                                                                                                                                                                                                                                                                                                                        |
| <b>When and how much</b>             | The frequency of delivery.                                                   | Thrice weekly during each dialysis session.                                                                                                                                                                                                                                                                                                                                                                                                         |
|                                      | Target intensity of each bout of exercise.                                   | RPE 12-14 (moderate intensity), cadence 60-70 RPM.                                                                                                                                                                                                                                                                                                                                                                                                  |
|                                      | Target duration of each bout of exercise.                                    | At least 30 minutes of continuous exercise.                                                                                                                                                                                                                                                                                                                                                                                                         |
|                                      | The total duration of delivery.                                              | Six months, with a one-month run-in period to achieve the target exercise prescription.                                                                                                                                                                                                                                                                                                                                                             |
| <b>Tailoring.</b>                    |                                                                              | <ul style="list-style-type: none"> <li>The starting resistance (gear) based on the individual's tolerance.</li> <li>RPE used throughout to monitor and progress the exercise.</li> <li>Interval training was permitted.</li> </ul>                                                                                                                                                                                                                  |

Abbreviations: HD, haemodialysis; Kcal, kilocalories; RPE, rating of perceived exertion, RPM, revolutions per minute.

Supplementary material 3. A priori progression criteria based on the primary feasibility objectives.

|                               |             |                                                         |
|-------------------------------|-------------|---------------------------------------------------------|
| <b>Eligibility</b>            | <b>Stop</b> | Less than <b>20%</b> of all patients eligible           |
|                               | <b>Go</b>   | More than <b>50%</b> of all patients eligible           |
| <b>Recruitment</b>            | <b>Stop</b> | Less than <b>25%</b> of eligible patients recruited     |
|                               | <b>Go</b>   | More than <b>50%</b> of eligible patients recruited     |
| <b>Exercise acceptability</b> | <b>Stop</b> | Less than <b>30%</b> adherence to the exercise sessions |
|                               | <b>Go</b>   | More than <b>70%</b> adherence to the exercise sessions |
| <b>Outcome acceptability</b>  | <b>Stop</b> | Less than <b>70%</b> outcome measure completion         |
|                               | <b>Go</b>   | More than <b>80%</b> outcome measure completion         |
| <b>Loss to follow-up</b>      | <b>Stop</b> | More than <b>40%</b> loss to follow-up                  |
|                               | <b>Go</b>   | Less than <b>20%</b> loss to follow-up                  |



Supplementary material 4. Patient-reported secondary outcome measures.

| Patient-reported secondary outcome                                        | Construct measured                                                                                                                                                                                                                                                            |
|---------------------------------------------------------------------------|-------------------------------------------------------------------------------------------------------------------------------------------------------------------------------------------------------------------------------------------------------------------------------|
| 12-item Short-Form Health Survey Version 2 (SF-12)                        | Generic health-related quality of life. Higher scores reflect better HRQoL. Scores are presented as a mental and physical component summary score.                                                                                                                            |
| Palliative care Outcomes Scale – Renal version (POS-R)                    | Renal specific measure of symptomology and symptom burden. A global symptom score was calculated by totalling all the scored items within the questionnaire. The mean number of symptoms, symptom severity was also calculated. Higher scores reflect greater symptom burden. |
| Hospital Anxiety and Depression Scale (HADS)                              | Emotional distress. A score of $\geq 14$ indicates the presence of emotional distress in HD patients                                                                                                                                                                          |
| The Exercise Self-Efficacy Scale (ESES)                                   | Exercise confidence. Higher scores reflecting greater self-efficacy.                                                                                                                                                                                                          |
| Dialysis Patient-Perceived Exercise Benefits and Barriers Scale (DPPEBBS) | HD patients' perceptions of benefits and barriers to exercise. Higher scores indicate a greater perception of the benefits of exercise over barriers.                                                                                                                         |
| The Dukes Activity Status Index (DASI)                                    | Self-reported physical function. Higher scores indicate higher levels of physical function. The questionnaire was also used to estimate $VO_2$ peak.                                                                                                                          |

HD, haemodialysis; HRQoL, Health-related quality of life.

1  
2  
3 *Supplementary material 5. Interview topic guide question.*  
4

5 Diary  
6  
7  
8

- 9 1. Can you tell me about how you have been using the diary?  
10  
11 2. If we asked patients to keep diaries like yours as part of a future study, what might help  
12 them?  
13  
14 3. [If applicable] I've had an opportunity to have a look through your diary. Could you tell  
15 me more about...?  
16

17  
18  
19 Exercise intervention for frailty and falls  
20

- 21  
22  
23 4. For some people exercising helps to prevent falls, make people more able and feel better.  
24 How do you feel about exercising?  
25  
26 5. Cycling during dialysis is thought to be a good way to exercise if you are on dialysis. Have  
27 you seen these bikes?  
28  
29 6. Programmes that are available for other people who fall include things like group exercise  
30 and education. What do you think about this?  
31  
32 7. These programmes usually take place at the hospital. What do you think about this?  
33  
34 8. Some people prefer to do their exercise at home. What do you think about this?  
35  
36 9. Where do you think a programme should be run?  
37  
38 10. How often do you think you would be able to exercise?  
39  
40 11. Would you want any support to help you exercise?  
41  
42 12. What might put you off exercising?  
43  
44 13. What questions might you have before you decide to take part or not?  
45  
46 14. If you did take part in some kind of exercise programme, what improvements would you  
47 most like to see?  
48  
49

50  
51 Research  
52

- 53 15. Have you ever been involved in research before? [Could tailor to involvement in CYCLE  
54 study (declined/ took part. If took part completed/dropped out) if patient unsure]  
55  
56 16. What do you think about the information you receive when deciding to take part in a  
57 research study?  
58  
59  
60

1  
2  
3 17. Often researchers ask you to complete some assessments or tests to see if the thing they  
4 are studying is effective or not. What do you think would help patients to complete these  
5 assessments/ tests?  
6

7  
8 18. Sometimes people don't complete the research study, which may happen for several  
9 reasons [give examples as needed]. What do you think would help keep dialysis from  
10 dropping out of research studies?  
11

12 19. What would you like to happen once you reach the end of the study?  
13  
14  
15  
16  
17  
18  
19  
20  
21  
22  
23  
24  
25  
26  
27  
28  
29  
30  
31  
32  
33  
34  
35  
36  
37  
38  
39  
40  
41  
42  
43  
44  
45  
46  
47  
48  
49  
50  
51  
52  
53  
54  
55  
56  
57  
58  
59  
60

For peer review only

Supplementary material 6. Falls summary data and incidence of falls per person years.

|                                                                         | <b>Usual care</b><br>(n=27) | <b>Exercise</b><br>(n=24) |
|-------------------------------------------------------------------------|-----------------------------|---------------------------|
| <b>Number of Falls</b>                                                  | 11                          | 5                         |
| <b>Number (% of group) of non-fallers</b>                               | 19 (70)                     | 20 (83)                   |
| <b>Number (% of group) fallers (<math>\geq 1</math> fall)</b>           | 8 (30)                      | 4 (17)                    |
| <b>Number (% of group) frequent fallers (<math>\geq 2</math> falls)</b> | 3 (11)                      | 1 (4)                     |
| <b>Person years</b>                                                     | 40.5                        | 36                        |
| <b>Incidence rate</b>                                                   | 0.27                        | 0.14                      |

For peer review only

Supplementary material 7. Changes in exercise capacity and physical function after six months.

|             | Outcome             |          | Usual Care  | Exercise     | Difference (95% CI)  |
|-------------|---------------------|----------|-------------|--------------|----------------------|
| ISWT (m)    |                     | n        | 16          | 15           | 36 (-12 to 84)       |
|             |                     | Baseline | 184 ± 130   | 237 ± 173    |                      |
|             |                     | Final    | 158 ± 154   | 248 ± 192    |                      |
|             |                     | Change   | -26 ± 68    | 11 ± 63      |                      |
| ESWT (secs) |                     | n        | 14          | 15           | 181 (-92 to 453)     |
|             |                     | Baseline | 347 ± 384   | 401 ± 375    |                      |
|             |                     | Final    | 193 ± 304   | 428 ± 423    |                      |
|             |                     | Change   | -153 ± 286  | 27 ± 413     |                      |
| STS60 (n)   |                     | n        | 17          | 15           | 0 (-5 to 4)          |
|             |                     | Baseline | 10 ± 12     | 13 ± 11      |                      |
|             |                     | Final    | 10 ± 13     | 13 ± 12      |                      |
|             |                     | Change   | 0 ± 7       | 0 ± 6        |                      |
| SPPB        | Total score         | n        | 17          | 15           | 0.5 (-0.7 to 2)      |
|             |                     | Baseline | 7 ± 3       | 9 ± 3        |                      |
|             |                     | Final    | 6 ± 2       | 8 ± 3        |                      |
|             |                     | Change   | -1 ± 2      | -0.5 ± 1     |                      |
|             | 4m walk time (secs) | n        | 17          | 15           | 1 (-1 to 4)          |
|             |                     | Baseline | 7 ± 6       | 4 ± 1        |                      |
|             |                     | Final    | 6 ± 4       | 5 ± 2        |                      |
|             |                     | Change   | 1 ± 5       | 0 ± 1        |                      |
|             | Gait speed (m/s)    | n        | 17          | 15           | 0.05 (-0.12 to 0.22) |
|             |                     | Baseline | 0.74 ± 0.29 | 0.96 ± 0.28  |                      |
|             |                     | Final    | 0.74 ± 0.28 | 0.91 ± 0.31  |                      |
|             |                     | Change   | 0.00 ± 0.22 | -0.05 ± 0.24 |                      |
|             | STS5 (secs)         | n        | 9           | 10           | 5 (-4 to 15)         |
|             |                     | Baseline | 17 ± 7      | 16 ± 14      |                      |
|             |                     | Final    | 23 ± 13     | 16 ± 10      |                      |
|             |                     | Change   | 6 ± 11      | 0 ± 8        |                      |

Abbreviations: CI, confidence interval; ESWT, Endurance Shuttle Walk Test; ISWT, Incremental Shuttle Walk Test; m/s, metres per second; Secs, seconds; SPPB, Short Physical Performance Battery; STS5, Sit to Stand Five Repetitions; STS60, Sit to Stand in Sixty Seconds.

Supplementary material 8. Changes in physical activity (accelerometry data) after six months.

|                         | Type of day |          | Usual Care  | Exercise    | Difference (95% CI) |
|-------------------------|-------------|----------|-------------|-------------|---------------------|
| Waking wear time (mins) | HD          | n        | 5           | 10          | 244 (16 to 473)     |
|                         |             | Baseline | 891 ± 202   | 818 ± 183   |                     |
|                         |             | Final    | 749 ± 105   | 921 ± 171   |                     |
|                         |             | Change   | -142 ± 166  | 103 ± 204   |                     |
|                         | Non-HD      | n        | 5           | 10          | 170 (-13 to 353)    |
|                         |             | Baseline | 893 ± 90    | 927 ± 216   |                     |
|                         |             | Final    | 817 ± 134   | 1022 ± 165  |                     |
|                         |             | Change   | -75 ± 201   | 95 ± 129    |                     |
| Steps (steps/day)       | HD          | n        | 5           | 10          | 859 (-825 to 2543)  |
|                         |             | Baseline | 2252 ± 4210 | 1373 ± 1080 |                     |
|                         |             | Final    | 2464 ± 4783 | 2444 ± 1904 |                     |
|                         |             | Change   | 211 ± 593   | 1070 ± 1665 |                     |
|                         | Non-HD      | n        | 5           | 10          | 888 (-84 to 1861)   |
|                         |             | Baseline | 3076 ± 5790 | 2387 ± 1696 |                     |
|                         |             | Final    | 2645 ± 5284 | 2845 ± 2117 |                     |
|                         |             | Change   | -430 ± 603  | 458 ± 903   |                     |
| Sedentary (mins/day)    | HD          | n        | 5           | 10          | 28 (-284 to 340)    |
|                         |             | Baseline | 954 ± 338   | 954 ± 203   |                     |
|                         |             | Final    | 965 ± 208   | 992 ± 182   |                     |
|                         |             | Change   | 10 ± 200    | 38 ± 287    |                     |
|                         | Non-HD      | n        | 5           | 10          | 124 (-205 to 454)   |
|                         |             | Baseline | 1022 ± 357  | 1103 ± 253  |                     |
|                         |             | Final    | 912 ± 224   | 1117 ± 174  |                     |
|                         |             | Change   | -110 ± 298  | 14 ± 269    |                     |
| Light PA (mins/day)     | HD          | n        | 5           | 10          | 91 (23 to -158)     |
|                         |             | Baseline | 125 ± 51    | 83 ± 42     |                     |
|                         |             | Final    | 79 ± 39     | 127 ± 73    |                     |
|                         |             | Change   | -46 ± 45    | 44 ± 62     |                     |
|                         | Non-HD      | n        | 5           | 10          | 9 (-71 to 91)       |
|                         |             | Baseline | 145 ± 59    | 133 ± 50    |                     |
|                         |             | Final    | 154 ± 99    | 151 ± 59    |                     |
|                         |             | Change   | 9 ± 108     | 18 ± 44     |                     |
| Moderate PA (mins/day)  | HD          | n        | 5           | 10          | 13 (-32 to 57)      |
|                         |             | Baseline | 83 ± 105    | 29 ± 33     |                     |
|                         |             | Final    | 85 ± 123    | 43 ± 55     |                     |
|                         |             | Change   | 1 ± 52      | 14 ± 29     |                     |
|                         | Non-HD      | n        | 5           | 10          | 20 (40 to -79)      |
|                         |             | Baseline | 79 ± 96     | 46 ± 61     |                     |
|                         |             | Final    | 75 ± 112    | 62 ± 105    |                     |
|                         |             | Change   | -4 ± 40     | 16 ± 55     |                     |
| Vigorous PA (mins/day)  | HD          | n        | 5           | 10          | 3 (-1 to 8)         |
|                         |             | Baseline | 4 ± 9       | 1 ± 1       |                     |
|                         |             | Final    | 1 ± 2       | 1 ± 3       |                     |
|                         |             | Change   | -3 ± 7      | 0 ± 2       |                     |
|                         | Non-HD      | n        | 5           | 10          | 1 (0 to 2)          |
|                         |             | Baseline | 3 ± 0       | 1 ± 4       |                     |
|                         |             | Final    | 2 ± 5       | 1 ± 4       |                     |
|                         |             | Change   | -1 ± 2      | 0 ± 0       |                     |

Abbreviations: CI, confidence interval; HD, haemodialysis; mins, minutes; PA, physical activity.

## Supplementary material 9. Patient-reported outcomes measures after six months.

|         | Outcome               |               | Usual Care    | Exercise              | Difference (95% CI) |
|---------|-----------------------|---------------|---------------|-----------------------|---------------------|
| SF-12   | PCS                   | n             | 19            | 19                    | 0 (-4 to 5)         |
|         |                       | Baseline      | 35 ± 9        | 35 ± 10               |                     |
|         |                       | Final         | 36 ± 10       | 36 ± 10               |                     |
|         |                       | Change        | 1 ± 7         | 1 ± 7                 |                     |
|         | MCS                   | n             | 19            | 19                    | 4 (-3 to 10)        |
|         |                       | Baseline      | 43 ± 15       | 45 ± 13               |                     |
|         |                       | Final         | 46 ± 13       | 45 ± 13               |                     |
|         |                       | Change        | 4 ± 7         | 0 ± 12                |                     |
| HADS    | n                     | 20            | 17            | 0 (-3 to 4)           |                     |
|         | Baseline              | 16 ± 10       | 15 ± 9        |                       |                     |
|         | Final                 | 14 ± 10       | 13 ± 9        |                       |                     |
|         | Change                | -2 ± 5        | -2 ± 6        |                       |                     |
| POS-R   | Global severity score | n             | 20            | 18                    | 2 (-3 to 7)         |
|         |                       | Baseline      | 19 ± 14       | 19 ± 14               |                     |
|         |                       | Final         | 18 ± 14       | 20 ± 14               |                     |
|         |                       | Change        | 1 ± 6         | -1 ± 9                |                     |
|         | mean severity         | n             | 20            | 18                    | 0 (0 to 0)          |
|         |                       | Baseline      | 2 ± 1         | 2 ± 1                 |                     |
|         |                       | Final         | 2 ± 1         | 2 ± 1                 |                     |
|         |                       | Change        | 0 ± 0         | 0 ± 0                 |                     |
|         | mean number           | n             | 22            | 16                    | 0 (-1 to 2)         |
|         |                       | Baseline      | 9 ± 4         | 10 ± 4                |                     |
|         |                       | Final         | 9 ± 4         | 10 ± 5                |                     |
|         |                       | Change        | 0 ± 4         | 0 ± 2                 |                     |
| ESES    | n                     | 19            | 16            | 0 (-1 to 1)           |                     |
|         | Baseline              | 2 ± 2         | 2 ± 1         |                       |                     |
|         | Final                 | 2 ± 1         | 2 ± 1         |                       |                     |
|         | Change                | 0 ± 1         | 0 ± 1         |                       |                     |
| DPPEBBS | n                     | 19            | 15            | 3 (-4 to 11)          |                     |
|         | Baseline              | 59 ± 10       | 59 ± 15       |                       |                     |
|         | Final                 | 61 ± 10       | 65 ± 7        |                       |                     |
|         | Change                | 2 ± 7         | 6 ± 14        |                       |                     |
| DASI    | n                     | 20            | 18            | 4.93 (-0.94 to 10.80) |                     |
|         | Baseline              | 13.06 ± 12.85 | 20.29 ± 14.33 |                       |                     |
|         | Final                 | 17.29 ± 14.41 | 19.60 ± 14.59 |                       |                     |
|         | Change                | 4.22 ± 9.72   | -0.71 ± 7.92  |                       |                     |

Abbreviations: CI, confidence interval; DASI, Duke Activity Status Index; DPPEBBS, Dialysis Patients Benefits and Barriers Scale; ESES, Exercise Self efficacy Scale; HADS, Hospital Anxiety and Depression Scale; MCS, mental component summary score; POS-R, Palliative Outcomes Scale Renal, PCS, physical component summary score; VAS, visual analogue scale.

Supplementary material 10. Baseline demographic and clinical characteristics for the qualitative participants.

|                                               | <b>N=25</b>                        |          |
|-----------------------------------------------|------------------------------------|----------|
| <b>Age (years)</b>                            | 69±10                              |          |
| <b>Gender n (%)</b>                           | Female                             | 13 (52%) |
|                                               | Male                               | 12 (48%) |
| <b>Ethnicity n (%)</b>                        | White background                   | 13 (52%) |
|                                               | Asian or Asian British             | 10 (40%) |
|                                               | Caribbean                          | 1 (4%)   |
|                                               | Not stated                         | 1 (4%)   |
| <b>Diagnosis</b>                              | Diabetic nephropathy               | 11 (44%) |
|                                               | Aetiology uncertain                | 6 (24%)  |
|                                               | Chronic pyelonephritis             | 3 (12%)  |
|                                               | Atypical hemolytic uremic syndrome | 1 (4%)   |
|                                               | FSGS                               | 1 (4%)   |
|                                               | Henoch-Schönlein Purpura           | 1 (4%)   |
|                                               | Minimal change nephropathy         | 1 (4%)   |
|                                               | Polycystic kidney disease          | 1 (4%)   |
| <b>CCI</b>                                    | 6±2                                |          |
| <b>Time on HD (months)</b>                    | 43 (IQR 16-85)                     |          |
| <b>CFS n (%)</b>                              | Vulnerable                         | 9 (36%)  |
|                                               | Mildly frail                       | 5 (20%)  |
|                                               | Moderately frail                   | 8 (32%)  |
|                                               | Severely frail                     | 3 (12%)  |
| <b>Number of falls in the last six months</b> | 3 (IQR 2-4)                        |          |
| <b>Previous transplant n (%)</b>              | No                                 | 21 (84%) |
|                                               | Yes                                | 4 (16%)  |
| <b>Active on transplant list n (%)</b>        | No                                 | 22 (88%) |
|                                               | Yes                                | 3 (12%)  |

Abbreviations: CCI, Charlson comorbidity index; CFS, clinical frailty scale; FSGS, Focal segmental glomerulosclerosis; HD, haemodialysis.



Supplementary material 11. Joint display of quantitative and qualitative results, with an overall assessment of mixed-methods inferences.

|                     | Progression criteria                                           | Feasibility trial                                                                            | Qualitative results                                                                                                                                                                                                                                                                                                                                                                                                                                                              | Mixed-methods inferences                        |
|---------------------|----------------------------------------------------------------|----------------------------------------------------------------------------------------------|----------------------------------------------------------------------------------------------------------------------------------------------------------------------------------------------------------------------------------------------------------------------------------------------------------------------------------------------------------------------------------------------------------------------------------------------------------------------------------|-------------------------------------------------|
| <b>Eligibility</b>  | <b>STOP</b> <20%<br><b>GO</b> >50% eligible.                   | 31% patients eligible                                                                        | No discussion. Patients not involved in screening process                                                                                                                                                                                                                                                                                                                                                                                                                        | Silence                                         |
| <b>Recruitment</b>  | <b>STOP</b> <25%<br><b>GO</b> >50% recruited.                  | 52% eligible patients recruited.                                                             | <ul style="list-style-type: none"> <li>- Frailer and female participants less likely to be approached despite eligibility and have more concerns about their suitability</li> <li>- Perception that risks outweigh the potential benefits</li> <li>- Recruitment processes could be improved</li> </ul>                                                                                                                                                                          | Complementary                                   |
| <b>Retention</b>    | <b>STOP</b> >40%<br><b>GO</b> <20% lost to follow-up.          | 12% loss to follow-up. Reasons predominantly unavoidable (death, ill-health).                | Loss to follow-up attributed to: <ul style="list-style-type: none"> <li>- Illness;</li> <li>- Length of trial;</li> <li>- Study not meeting expectations.</li> </ul>                                                                                                                                                                                                                                                                                                             | Complementary                                   |
| <b>Intervention</b> | <b>STOP</b> <30%<br><b>GO</b> >70% adherence over six-months.  | 74% adherence rate across the six-month exercise duration.                                   | <ul style="list-style-type: none"> <li>- IDC good use of time but limited in scope.</li> <li>- Participants felt safe and felt well supported.</li> <li>- Participants described a range of other important exercise components (see Figure 2)</li> </ul>                                                                                                                                                                                                                        | Complementary                                   |
| <b>Outcome</b>      | <b>STOP</b> <70%<br><b>GO</b> >80% outcome measure completion. | Up to 89% of secondary outcome measure data missing<br>Collection of falls data challenging. | <ul style="list-style-type: none"> <li>- Number of outcomes measured viewed as excessive.</li> <li>- Outcome testing during HD or at home preferred.</li> <li>- 52% agreed to complete a falls diary, falls not prioritised by participants.</li> <li>- STS60, ESWT and ISWT unsuitable</li> <li>- Researcher support and family involvement may increase outcome measure completion</li> <li>- Outcomes measuring ADLs and participation in social roles prioritised</li> </ul> | Complementary<br><br>Silence for PA monitoring. |

Results from the feasibility trial are colour coded to depict whether they met the 'stop' (red), 'go' (green) or 'change (orange) progression criteria.

Abbreviations: ADLs, activities of daily living; ESWT, Endurance Shuttle Walk Test; IDC, intradialytic exercise; ISWT, Incremental Shuttle Walk Test; PA, physical activity; STS60, sit to stand in sixty seconds.

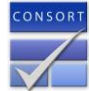

## CONSORT 2010 checklist of information to include when reporting a pilot or feasibility trial\*

| Section/Topic             | Item No | Checklist item                                                                                                                                               | Reported on page No                     |
|---------------------------|---------|--------------------------------------------------------------------------------------------------------------------------------------------------------------|-----------------------------------------|
| <b>Title and abstract</b> |         |                                                                                                                                                              |                                         |
|                           | 1a      | Identification as a pilot or feasibility randomised trial in the title                                                                                       | 1                                       |
|                           | 1b      | Structured summary of pilot trial design, methods, results, and conclusions (for specific guidance see CONSORT abstract extension for pilot trials)          | 3-4                                     |
| <b>Introduction</b>       |         |                                                                                                                                                              |                                         |
| Background and objectives | 2a      | Scientific background and explanation of rationale for future definitive trial, and reasons for randomised pilot trial                                       | 6                                       |
|                           | 2b      | Specific objectives or research questions for pilot trial                                                                                                    | 6-7                                     |
| <b>Methods</b>            |         |                                                                                                                                                              |                                         |
| Trial design              | 3a      | Description of pilot trial design (such as parallel, factorial) including allocation ratio                                                                   | 7-8                                     |
|                           | 3b      | Important changes to methods after pilot trial commencement (such as eligibility criteria), with reasons                                                     | n/a                                     |
| Participants              | 4a      | Eligibility criteria for participants                                                                                                                        | 7 and supplementary material 1          |
|                           | 4b      | Settings and locations where the data were collected                                                                                                         | 7-8,10-11                               |
|                           | 4c      | How participants were identified and consented                                                                                                               | 8                                       |
| Interventions             | 5       | The interventions for each group with sufficient details to allow replication, including how and when they were actually administered                        | 8 and supplementary material 2          |
| Outcomes                  | 6a      | Completely defined prespecified assessments or measurements to address each pilot trial objective specified in 2b, including how and when they were assessed | 9-11, supplementary materials 3,4 and 5 |
|                           | 6b      | Any changes to pilot trial assessments or measurements after the pilot trial commenced, with reasons                                                         | n/a                                     |
|                           | 6c      | If applicable, prespecified criteria used to judge whether, or how, to proceed with future definitive trial                                                  | 9 and supplementary material 3          |
| Sample size               | 7a      | Rationale for numbers in the pilot trial                                                                                                                     | 8-9                                     |

|                                                      |     |                                                                                                                                                                                             |                                                         |
|------------------------------------------------------|-----|---------------------------------------------------------------------------------------------------------------------------------------------------------------------------------------------|---------------------------------------------------------|
|                                                      | 7b  | When applicable, explanation of any interim analyses and stopping guidelines                                                                                                                | 9                                                       |
| Randomisation:                                       |     |                                                                                                                                                                                             |                                                         |
| Sequence generation                                  | 8a  | Method used to generate the random allocation sequence                                                                                                                                      | 8                                                       |
|                                                      | 8b  | Type of randomisation(s); details of any restriction (such as blocking and block size)                                                                                                      | 8                                                       |
| Allocation concealment mechanism                     | 9   | Mechanism used to implement the random allocation sequence (such as sequentially numbered containers), describing any steps taken to conceal the sequence until interventions were assigned | 8                                                       |
| Implementation                                       | 10  | Who generated the random allocation sequence, who enrolled participants, and who assigned participants to interventions                                                                     | 8                                                       |
| Blinding                                             | 11a | If done, who was blinded after assignment to interventions (for example, participants, care providers, those assessing outcomes) and how                                                    | 9                                                       |
|                                                      | 11b | If relevant, description of the similarity of interventions                                                                                                                                 | n/a                                                     |
| Statistical methods                                  | 12  | Methods used to address each pilot trial objective whether qualitative or quantitative                                                                                                      | 11                                                      |
| <b>Results</b>                                       |     |                                                                                                                                                                                             |                                                         |
| Participant flow (a diagram is strongly recommended) | 13a | For each group, the numbers of participants who were approached and/or assessed for eligibility, randomly assigned, received intended treatment, and were assessed for each objective       | 12-13 figure 1                                          |
|                                                      | 13b | For each group, losses and exclusions after randomisation, together with reasons                                                                                                            | 12-13 figure 1                                          |
| Recruitment                                          | 14a | Dates defining the periods of recruitment and follow-up                                                                                                                                     | 12                                                      |
|                                                      | 14b | Why the pilot trial ended or was stopped                                                                                                                                                    | n/a                                                     |
| Baseline data                                        | 15  | A table showing baseline demographic and clinical characteristics for each group                                                                                                            | Table 1 (trial) supplementary material 10 (qualitative) |
| Numbers analysed                                     | 16  | For each objective, number of participants (denominator) included in each analysis. If relevant, these numbers should be by randomised group                                                | Supplementary materials 6-9 and page 15-17              |
| Outcomes and estimation                              | 17  | For each objective, results including expressions of uncertainty (such as 95% confidence interval) for any estimates. If relevant, these results should be by randomised group              | Supplementary materials 6-9 and page 15-17              |
| Ancillary analyses                                   | 18  | Results of any other analyses performed that could be used to inform the future definitive trial                                                                                            | 17- 26                                                  |
| Harms                                                | 19  | All important harms or unintended effects in each group (for specific guidance see CONSORT for harms)                                                                                       | P 17                                                    |
|                                                      | 19a | If relevant, other important unintended consequences                                                                                                                                        | n/a                                                     |
| <b>Discussion</b>                                    |     |                                                                                                                                                                                             |                                                         |

|   |                          |     |                                                                                                                                                     |         |
|---|--------------------------|-----|-----------------------------------------------------------------------------------------------------------------------------------------------------|---------|
| 1 | Limitations              | 20  | Pilot trial limitations, addressing sources of potential bias and remaining uncertainty about feasibility                                           | 30      |
| 2 | Generalisability         | 21  | Generalisability (applicability) of pilot trial methods and findings to future definitive trial and other studies                                   | 26-31   |
| 3 | Interpretation           | 22  | Interpretation consistent with pilot trial objectives and findings, balancing potential benefits and harms, and considering other relevant evidence | 26-31   |
| 4 |                          | 22a | Implications for progression from pilot to future definitive trial, including any proposed amendments                                               | 26-31   |
| 5 | <b>Other information</b> |     |                                                                                                                                                     |         |
| 6 | Registration             | 23  | Registration number for pilot trial and name of trial registry                                                                                      | 4 and 7 |
| 7 | Protocol                 | 24  | Where the pilot trial protocol can be accessed, if available                                                                                        | 7       |
| 8 | Funding                  | 25  | Sources of funding and other support (such as supply of drugs), role of funders                                                                     | 31      |
| 9 |                          | 26  | Ethical approval or approval by research review committee, confirmed with reference number                                                          | 32      |

10  
11  
12  
13  
14  
15 Citation: Eldridge SM, Chan CL, Campbell MJ, Bond CM, Hopewell S, Thabane L, et al. CONSORT 2010 statement: extension to randomised pilot and feasibility trials. *BMJ*. 2016;355.

16 \*We strongly recommend reading this statement in conjunction with the CONSORT 2010, extension to randomised pilot and feasibility trials, Explanation and Elaboration for important  
17 clarifications on all the items. If relevant, we also recommend reading CONSORT extensions for cluster randomised trials, non-inferiority and equivalence trials, non-pharmacological  
18 treatments, herbal interventions, and pragmatic trials. Additional extensions are forthcoming: for those and for up to date references relevant to this checklist, see [www.consort-statement.org](http://www.consort-statement.org).  
19  
20  
21  
22  
23  
24  
25  
26  
27  
28  
29  
30  
31  
32  
33  
34  
35  
36  
37  
38  
39  
40  
41  
42  
43  
44  
45  
46
