# Supplementary material for: Exercise for people living with frailty and receiving haemodialysis: a mixed-methods randomised controlled feasibility study
Source: PubMed Central journal article supplement (PMC7640592; doi:10.1136/bmjopen-2020-041227), 2020-11-03
Supplement: bmjopen-2020-041227supp001.pdf [file bmjopen-2020-041227supp001.pdf]

Supplementary material 1. Inclusion and exclusion criteria for the *CYCLE-HD* trial.

| Inclusion criteria                        | Exclusion criteria                                                                                      |
|-------------------------------------------|---------------------------------------------------------------------------------------------------------|
| Prevalent HD patient (> three months)     | Unable to participate in current exercise programme due to perceived physical or psychological barriers |
| Aged 18 years or older                    | Unable to undergo MRI scanning (metal implants, severe claustrophobia)                                  |
| Able and willing to give informed consent | Unfit to undertake exercise according to the American College of Sports Medicine (ACSM) guidelines      |
