# Supplementary material for: Exercise for people living with frailty and receiving haemodialysis: a mixed-methods randomised controlled feasibility study
Source: PubMed Central journal article supplement (PMC7640592; doi:10.1136/bmjopen-2020-041227), 2020-11-03
Supplement: bmjopen-2020-041227supp002.pdf [file bmjopen-2020-041227supp002.pdf]

## Supplementary material 2. Summary of intervention characteristics, in line with TiDier guidance.

|                                      |                                                                              |                                                                                                                                                                                                                                                                                                                                                                                                                                                     |
|--------------------------------------|------------------------------------------------------------------------------|-----------------------------------------------------------------------------------------------------------------------------------------------------------------------------------------------------------------------------------------------------------------------------------------------------------------------------------------------------------------------------------------------------------------------------------------------------|
| <b>Description of intervention.</b>  |                                                                              | A structured, supervised cycling exercise intervention delivered during in-centre HD.                                                                                                                                                                                                                                                                                                                                                               |
| <b>Rationale.</b>                    |                                                                              | <ul style="list-style-type: none"> <li>Intradialytic cycling provides aerobic and low-level resistance training, is associated with increased adherence and is most widely used within practice.</li> </ul>                                                                                                                                                                                                                                         |
| <b>What.</b>                         | Materials provided to participants or used to support intervention delivery. | <ul style="list-style-type: none"> <li>Cycling was delivered using the Moto Med Letto 2 (Medimotion Ltd).</li> <li>Materials: individualised exercise prescription and records of individual training bouts (duration (mins), intensity (RPE), resistance (gear), power output (watts) and energy expenditure (Kcal).</li> <li>General information on the benefits of exercise (posters and leaflets) available across all 3 HD centres.</li> </ul> |
|                                      | Materials used to train intervention providers.                              | Standardised progression and training protocol used by all providers.                                                                                                                                                                                                                                                                                                                                                                               |
| <b>Who</b> (intervention providers). |                                                                              | <ul style="list-style-type: none"> <li>Qualified exercise professionals with experience of delivering exercise to renal patients.</li> <li>All providers were directly involved in the study, and not delivering the sessions as part of a clinical role.</li> <li>Roles included exercise provision, supervision, monitoring and progression.</li> </ul>                                                                                           |
| <b>How</b> (mode of delivery).       |                                                                              | One to one, face to face.                                                                                                                                                                                                                                                                                                                                                                                                                           |
| <b>Where</b> (location).             |                                                                              | Three HD units across the East Midlands, UK.                                                                                                                                                                                                                                                                                                                                                                                                        |
| <b>When and how much</b>             | The frequency of delivery.                                                   | Thrice weekly during each dialysis session.                                                                                                                                                                                                                                                                                                                                                                                                         |
|                                      | Target intensity of each bout of exercise.                                   | RPE 12-14 (moderate intensity), cadence 60-70 RPM.                                                                                                                                                                                                                                                                                                                                                                                                  |
|                                      | Target duration of each bout of exercise.                                    | At least 30 minutes of continuous exercise.                                                                                                                                                                                                                                                                                                                                                                                                         |
|                                      | The total duration of delivery.                                              | Six months, with a one-month run-in period to achieve the target exercise prescription.                                                                                                                                                                                                                                                                                                                                                             |
| <b>Tailoring.</b>                    |                                                                              | <ul style="list-style-type: none"> <li>The starting resistance (gear) based on the individual's tolerance.</li> <li>RPE used throughout to monitor and progress the exercise.</li> <li>Interval training was permitted.</li> </ul>                                                                                                                                                                                                                  |

Abbreviations: HD, haemodialysis; Kcal, kilocalories; RPE, rating of perceived exertion, RPM, revolutions per minute.
