# Supplementary material for: Exercise for people living with frailty and receiving haemodialysis: a mixed-methods randomised controlled feasibility study
Source: PubMed Central journal article supplement (PMC7640592; doi:10.1136/bmjopen-2020-041227), 2020-11-03
Supplement: bmjopen-2020-041227supp003.pdf [file bmjopen-2020-041227supp003.pdf]

*Supplementary material 3. A priori progression criteria based on the primary feasibility objectives.*

|                               |             |                                                         |
|-------------------------------|-------------|---------------------------------------------------------|
| <b>Eligibility</b>            | <b>Stop</b> | Less than <b>20%</b> of all patients eligible           |
|                               | <b>Go</b>   | More than <b>50%</b> of all patients eligible           |
| <b>Recruitment</b>            | <b>Stop</b> | Less than <b>25%</b> of eligible patients recruited     |
|                               | <b>Go</b>   | More than <b>50%</b> of eligible patients recruited     |
| <b>Exercise acceptability</b> | <b>Stop</b> | Less than <b>30%</b> adherence to the exercise sessions |
|                               | <b>Go</b>   | More than <b>70%</b> adherence to the exercise sessions |
| <b>Outcome acceptability</b>  | <b>Stop</b> | Less than <b>70%</b> outcome measure completion         |
|                               | <b>Go</b>   | More than <b>80%</b> outcome measure completion         |
| <b>Loss to follow-up</b>      | <b>Stop</b> | More than <b>40%</b> loss to follow-up                  |
|                               | <b>Go</b>   | Less than <b>20%</b> loss to follow-up                  |
