# Supplementary material for: Exercise for people living with frailty and receiving haemodialysis: a mixed-methods randomised controlled feasibility study
Source: PubMed Central journal article supplement (PMC7640592; doi:10.1136/bmjopen-2020-041227), 2020-11-03
Supplement: bmjopen-2020-041227supp004.pdf [file bmjopen-2020-041227supp004.pdf]

*Supplementary material 4. Patient-reported secondary outcome measures.*

| <b>Patient-reported secondary outcome</b>                                 | <b>Construct measured</b>                                                                                                                                                                                                                                                     |
|---------------------------------------------------------------------------|-------------------------------------------------------------------------------------------------------------------------------------------------------------------------------------------------------------------------------------------------------------------------------|
| 12-item Short-Form Health Survey Version 2 (SF-12)                        | Generic health-related quality of life. Higher scores reflect better HRQoL. Scores are presented as a mental and physical component summary score.                                                                                                                            |
| Palliative care Outcomes Scale – Renal version (POS-R)                    | Renal specific measure of symptomology and symptom burden. A global symptom score was calculated by totalling all the scored items within the questionnaire. The mean number of symptoms, symptom severity was also calculated. Higher scores reflect greater symptom burden. |
| Hospital Anxiety and Depression Scale (HADS)                              | Emotional distress. A score of $\geq 14$ indicates the presence of emotional distress in HD patients                                                                                                                                                                          |
| The Exercise Self-Efficacy Scale (ESES)                                   | Exercise confidence. Higher scores reflecting greater self-efficacy.                                                                                                                                                                                                          |
| Dialysis Patient-Perceived Exercise Benefits and Barriers Scale (DPPEBBS) | HD patients' perceptions of benefits and barriers to exercise. Higher scores indicate a greater perception of the benefits of exercise over barriers.                                                                                                                         |
| The Dukes Activity Status Index (DASI)                                    | Self-reported physical function. Higher scores indicate higher levels of physical function. The questionnaire was also used to estimate VO <sub>2</sub> peak.                                                                                                                 |

HD, haemodialysis; HRQoL, Health-related quality of life.
