# Supplementary material for: Exercise for people living with frailty and receiving haemodialysis: a mixed-methods randomised controlled feasibility study
Source: PubMed Central journal article supplement (PMC7640592; doi:10.1136/bmjopen-2020-041227), 2020-11-03
Supplement: bmjopen-2020-041227supp006.pdf [file bmjopen-2020-041227supp006.pdf]

*Supplementary material 6. Falls summary data and incidence of falls per person years.*

|                                                                         | <b>Usual care</b><br>(n=27) | <b>Exercise</b><br>(n=24) |
|-------------------------------------------------------------------------|-----------------------------|---------------------------|
| <b>Number of Falls</b>                                                  | 11                          | 5                         |
| <b>Number (% of group) of non-fallers</b>                               | 19 (70)                     | 20 (83)                   |
| <b>Number (% of group) fallers (<math>\geq 1</math> fall)</b>           | 8 (30)                      | 4 (17)                    |
| <b>Number (% of group) frequent fallers (<math>\geq 2</math> falls)</b> | 3 (11)                      | 1 (4)                     |
| <b>Person years</b>                                                     | 40.5                        | 36                        |
| <b>Incidence rate</b>                                                   | 0.27                        | 0.14                      |
