# Supplementary material for: Exercise for people living with frailty and receiving haemodialysis: a mixed-methods randomised controlled feasibility study
Source: PubMed Central journal article supplement (PMC7640592; doi:10.1136/bmjopen-2020-041227), 2020-11-03
Supplement: bmjopen-2020-041227supp007.pdf [file bmjopen-2020-041227supp007.pdf]

Supplementary material 7. Changes in exercise capacity and physical function after six months.

|                       | Outcome             | Usual Care | Exercise    | Difference (95% CI) |                      |
|-----------------------|---------------------|------------|-------------|---------------------|----------------------|
| <b>ISWT</b><br>(m)    | n                   | 16         | 15          | 36 (-12 to 84)      |                      |
|                       | Baseline            | 184 ± 130  | 237 ± 173   |                     |                      |
|                       | Final               | 158 ± 154  | 248 ± 192   |                     |                      |
|                       | Change              | -26 ± 68   | 11 ± 63     |                     |                      |
| <b>ESWT</b><br>(secs) | n                   | 14         | 15          | 181 (-92 to 453)    |                      |
|                       | Baseline            | 347 ± 384  | 401 ± 375   |                     |                      |
|                       | Final               | 193 ± 304  | 428 ± 423   |                     |                      |
|                       | Change              | -153 ± 286 | 27 ± 413    |                     |                      |
| <b>STS60</b><br>(n)   | n                   | 17         | 15          | 0 (-5 to 4)         |                      |
|                       | Baseline            | 10 ± 12    | 13 ± 11     |                     |                      |
|                       | Final               | 10 ± 13    | 13 ± 12     |                     |                      |
|                       | Change              | 0 ± 7      | 0 ± 6       |                     |                      |
| <b>SPPB</b>           | Total score         | n          | 17          | 15                  | 0.5 (-0.7 to 2)      |
|                       |                     | Baseline   | 7 ± 3       | 9 ± 3               |                      |
|                       |                     | Final      | 6 ± 2       | 8 ± 3               |                      |
|                       |                     | Change     | -1 ± 2      | -0.5 ± 1            |                      |
|                       | 4m walk time (secs) | n          | 17          | 15                  | 1 (-1 to 4)          |
|                       |                     | Baseline   | 7 ± 6       | 4 ± 1               |                      |
|                       |                     | Final      | 6 ± 4       | 5 ± 2               |                      |
|                       |                     | Change     | 1 ± 5       | 0 ± 1               |                      |
|                       | Gait speed (m/s)    | n          | 17          | 15                  | 0.05 (-0.12 to 0.22) |
|                       |                     | Baseline   | 0.74 ± 0.29 | 0.96 ± 0.28         |                      |
|                       |                     | Final      | 0.74 ± 0.28 | 0.91 ± 0.31         |                      |
|                       |                     | Change     | 0.00 ± 0.22 | -0.05 ± 0.24        |                      |
|                       | STS5 (secs)         | n          | 9           | 10                  | 5 (-4 to 15)         |
|                       |                     | Baseline   | 17 ± 7      | 16 ± 14             |                      |
|                       |                     | Final      | 23 ± 13     | 16 ± 10             |                      |
|                       |                     | Change     | 6 ± 11      | 0 ± 8               |                      |

Abbreviations: CI, confidence interval; ESWT, Endurance Shuttle Walk Test; ISWT, Incremental Shuttle Walk Test; m/s, metres per second; Secs, seconds; SPPB, Short Physical Performance Battery; STS5, Sit to Stand Five Repetitions; STS60, Sit to Stand in Sixty Seconds.
