# Supplementary material for: Exercise for people living with frailty and receiving haemodialysis: a mixed-methods randomised controlled feasibility study
Source: PubMed Central journal article supplement (PMC7640592; doi:10.1136/bmjopen-2020-041227), 2020-11-03
Supplement: bmjopen-2020-041227supp008.pdf [file bmjopen-2020-041227supp008.pdf]

Supplementary material 8. Changes in physical activity (accelerometry data) after six months.

|                         | Type of day |          | Usual Care  | Exercise    | Difference (95% CI) |
|-------------------------|-------------|----------|-------------|-------------|---------------------|
| Waking wear time (mins) | HD          | n        | 5           | 10          | 244 (16 to 473)     |
|                         |             | Baseline | 891 ± 202   | 818 ± 183   |                     |
|                         |             | Final    | 749 ± 105   | 921 ± 171   |                     |
|                         |             | Change   | -142 ± 166  | 103 ± 204   |                     |
|                         | Non-HD      | n        | 5           | 10          | 170 (-13 to 353)    |
|                         |             | Baseline | 893 ± 90    | 927 ± 216   |                     |
|                         |             | Final    | 817 ± 134   | 1022 ± 165  |                     |
|                         |             | Change   | -75 ± 201   | 95 ± 129    |                     |
| Steps (steps/day)       | HD          | n        | 5           | 10          | 859 (-825 to 2543)  |
|                         |             | Baseline | 2252 ± 4210 | 1373 ± 1080 |                     |
|                         |             | Final    | 2464 ± 4783 | 2444 ± 1904 |                     |
|                         |             | Change   | 211 ± 593   | 1070 ± 1665 |                     |
|                         | Non-HD      | n        | 5           | 10          | 888 (-84 to 1861)   |
|                         |             | Baseline | 3076 ± 5790 | 2387 ± 1696 |                     |
|                         |             | Final    | 2645 ± 5284 | 2845 ± 2117 |                     |
|                         |             | Change   | -430 ± 603  | 458 ± 903   |                     |
| Sedentary (mins/day)    | HD          | n        | 5           | 10          | 28 (-284 to 340)    |
|                         |             | Baseline | 954 ± 338   | 954 ± 203   |                     |
|                         |             | Final    | 965 ± 208   | 992 ± 182   |                     |
|                         |             | Change   | 10 ± 200    | 38 ± 287    |                     |
|                         | Non-HD      | n        | 5           | 10          | 124 (-205 to 454)   |
|                         |             | Baseline | 1022 ± 357  | 1103 ± 253  |                     |
|                         |             | Final    | 912 ± 224   | 1117 ± 174  |                     |
|                         |             | Change   | -110 ± 298  | 14 ± 269    |                     |
| Light PA (mins/day)     | HD          | n        | 5           | 10          | 91 (23 to -158)     |
|                         |             | Baseline | 125 ± 51    | 83 ± 42     |                     |
|                         |             | Final    | 79 ± 39     | 127 ± 73    |                     |
|                         |             | Change   | -46 ± 45    | 44 ± 62     |                     |
|                         | Non-HD      | n        | 5           | 10          | 9 (-71 to 91)       |
|                         |             | Baseline | 145 ± 59    | 133 ± 50    |                     |
|                         |             | Final    | 154 ± 99    | 151 ± 59    |                     |
|                         |             | Change   | 9 ± 108     | 18 ± 44     |                     |
| Moderate PA (mins/day)  | HD          | n        | 5           | 10          | 13 (-32 to 57)      |
|                         |             | Baseline | 83 ± 105    | 29 ± 33     |                     |
|                         |             | Final    | 85 ± 123    | 43 ± 55     |                     |
|                         |             | Change   | 1 ± 52      | 14 ± 29     |                     |
|                         | Non-HD      | n        | 5           | 10          | 20 (40 to -79)      |
|                         |             | Baseline | 79 ± 96     | 46 ± 61     |                     |
|                         |             | Final    | 75 ± 112    | 62 ± 105    |                     |
|                         |             | Change   | -4 ± 40     | 16 ± 55     |                     |
| Vigorous PA (mins/day)  | HD          | n        | 5           | 10          | 3 (-1 to 8)         |
|                         |             | Baseline | 4 ± 9       | 1 ± 1       |                     |
|                         |             | Final    | 1 ± 2       | 1 ± 3       |                     |
|                         |             | Change   | -3 ± 7      | 0 ± 2       |                     |
|                         | Non-HD      | n        | 5           | 10          | 1 (0 to 2)          |
|                         |             | Baseline | 3 ± 0       | 1 ± 4       |                     |
|                         |             | Final    | 2 ± 5       | 1 ± 4       |                     |
|                         |             | Change   | -1 ± 2      | 0 ± 0       |                     |

Abbreviations: CI, confidence interval; HD, haemodialysis; mins, minutes; PA, physical activity.
