# Supplementary material for: Exercise for people living with frailty and receiving haemodialysis: a mixed-methods randomised controlled feasibility study
Source: PubMed Central journal article supplement (PMC7640592; doi:10.1136/bmjopen-2020-041227), 2020-11-03
Supplement: bmjopen-2020-041227supp009.pdf [file bmjopen-2020-041227supp009.pdf]

## Supplementary material 9. Patient-reported outcomes measures after six months.

|         | Outcome               |          | Usual Care    | Exercise      | Difference (95% CI)   |
|---------|-----------------------|----------|---------------|---------------|-----------------------|
| SF-12   | PCS                   | n        | 19            | 19            | 0 (-4 to 5)           |
|         |                       | Baseline | 35 ± 9        | 35 ± 10       |                       |
|         |                       | Final    | 36 ± 10       | 36 ± 10       |                       |
|         |                       | Change   | 1 ± 7         | 1 ± 7         |                       |
|         | MCS                   | n        | 19            | 19            | 4 (-3 to 10)          |
|         |                       | Baseline | 43 ± 15       | 45 ± 13       |                       |
| Final   |                       | 46 ± 13  | 45 ± 13       |               |                       |
| Change  |                       | 4 ± 7    | 0 ± 12        |               |                       |
| HADS    |                       | n        | 20            | 17            | 0 (-3 to 4)           |
|         |                       | Baseline | 16 ± 10       | 15 ± 9        |                       |
|         |                       | Final    | 14 ± 10       | 13 ± 9        |                       |
|         |                       | Change   | -2 ± 5        | -2 ± 6        |                       |
| POS-R   | Global severity score | n        | 20            | 18            | 2 (-3 to 7)           |
|         |                       | Baseline | 19 ± 14       | 19 ± 14       |                       |
|         |                       | Final    | 18 ± 14       | 20 ± 14       |                       |
|         |                       | Change   | 1 ± 6         | -1 ± 9        |                       |
|         | mean severity         | n        | 20            | 18            | 0 (0 to 0)            |
|         |                       | Baseline | 2 ± 1         | 2 ± 1         |                       |
|         |                       | Final    | 2 ± 1         | 2 ± 1         |                       |
|         |                       | Change   | 0 ± 0         | 0 ± 0         |                       |
|         | mean number           | n        | 22            | 16            | 0 (-1 to 2)           |
|         |                       | Baseline | 9 ± 4         | 10 ± 4        |                       |
|         |                       | Final    | 9 ± 4         | 10 ± 5        |                       |
|         |                       | Change   | 0 ± 4         | 0 ± 2         |                       |
| ESES    |                       | n        | 19            | 16            | 0 (-1 to 1)           |
|         |                       | Baseline | 2 ± 2         | 2 ± 1         |                       |
|         |                       | Final    | 2 ± 1         | 2 ± 1         |                       |
|         |                       | Change   | 0 ± 1         | 0 ± 1         |                       |
| DPPEBBS |                       | n        | 19            | 15            | 3 (-4 to 11)          |
|         |                       | Baseline | 59 ± 10       | 59 ± 15       |                       |
|         |                       | Final    | 61 ± 10       | 65 ± 7        |                       |
|         |                       | Change   | 2 ± 7         | 6 ± 14        |                       |
| DASI    |                       | n        | 20            | 18            | 4.93 (-0.94 to 10.80) |
|         |                       | Baseline | 13.06 ± 12.85 | 20.29 ± 14.33 |                       |
|         |                       | Final    | 17.29 ± 14.41 | 19.60 ± 14.59 |                       |
|         |                       | Change   | 4.22 ± 9.72   | -0.71 ± 7.92  |                       |

Abbreviations: CI, confidence interval; DASI, Duke Activity Status Index; DPPEBBS, Dialysis Patients Benefits and Barriers Scale; ESES, Exercise Self efficacy Scale; HADS, Hospital Anxiety and Depression Scale; MCS, mental component summary score; POS-R, Palliative Outcomes Scale Renal, PCS, physical component summary score; VAS, visual analogue scale.
