# Supplementary material for: Exercise for people living with frailty and receiving haemodialysis: a mixed-methods randomised controlled feasibility study
Source: PubMed Central journal article supplement (PMC7640592; doi:10.1136/bmjopen-2020-041227), 2020-11-03
Supplement: bmjopen-2020-041227supp010.pdf [file bmjopen-2020-041227supp010.pdf]

*Supplementary material 10. Baseline demographic and clinical characteristics for the qualitative participants.*

|                                               | <b>N=25</b>                               |
|-----------------------------------------------|-------------------------------------------|
| <b>Age (years)</b>                            | 69±10                                     |
| <b>Gender n (%)</b>                           | Female 13 (52%)                           |
|                                               | Male 12 (48%)                             |
| <b>Ethnicity n (%)</b>                        | White background 13 (52%)                 |
|                                               | Asian or Asian British 10 (40%)           |
|                                               | Caribbean 1 (4%)                          |
|                                               | Not stated 1 (4%)                         |
| <b>Diagnosis</b>                              | Diabetic nephropathy 11 (44%)             |
|                                               | Aetiology uncertain 6 (24%)               |
|                                               | Chronic pyelonephritis 3 (12%)            |
|                                               | Atypical hemolytic uremic syndrome 1 (4%) |
|                                               | FSGS 1 (4%)                               |
|                                               | Henoch-Schönlein Purpura 1 (4%)           |
|                                               | Minimal change nephropathy 1 (4%)         |
|                                               | Polycystic kidney disease 1 (4%)          |
| <b>CCI</b>                                    | 6±2                                       |
| <b>Time on HD (months)</b>                    | 43 (IQR 16-85)                            |
| <b>CFS n (%)</b>                              | Vulnerable 9 (36%)                        |
|                                               | Mildly frail 5 (20%)                      |
|                                               | Moderately frail 8 (32%)                  |
|                                               | Severely frail 3 (12%)                    |
| <b>Number of falls in the last six months</b> | 3 (IQR 2-4)                               |
| <b>Previous transplant n (%)</b>              | No 21 (84%)                               |
|                                               | Yes 4 (16%)                               |
| <b>Active on transplant list n (%)</b>        | No 22 (88%)                               |
|                                               | Yes 3 (12%)                               |

*Abbreviations: CCI, Charlson comorbidity index; CFS, clinical frailty scale; FSGS, Focal segmental glomerulosclerosis; HD, haemodialysis.*
