# Supplementary material for: Exercise for people living with frailty and receiving haemodialysis: a mixed-methods randomised controlled feasibility study
Source: PubMed Central journal article supplement (PMC7640592; doi:10.1136/bmjopen-2020-041227), 2020-11-03
Supplement: bmjopen-2020-041227supp011.pdf [file bmjopen-2020-041227supp011.pdf]

Supplementary material 11. Joint display of quantitative and qualitative results, with an overall assessment of mixed-methods inferences.

|                     | Progression criteria                                           | Feasibility trial                                                                            | Qualitative results                                                                                                                                                                                                                                                                                                                                                                                                                                                              | Mixed-methods inferences                        |
|---------------------|----------------------------------------------------------------|----------------------------------------------------------------------------------------------|----------------------------------------------------------------------------------------------------------------------------------------------------------------------------------------------------------------------------------------------------------------------------------------------------------------------------------------------------------------------------------------------------------------------------------------------------------------------------------|-------------------------------------------------|
| <b>Eligibility</b>  | <b>STOP</b> <20%<br><b>GO</b> >50% eligible.                   | 31% patients eligible                                                                        | No discussion. Patients not involved in screening process                                                                                                                                                                                                                                                                                                                                                                                                                        | Silence                                         |
| <b>Recruitment</b>  | <b>STOP</b> <25%<br><b>GO</b> >50% recruited.                  | 52% eligible patients recruited.                                                             | <ul style="list-style-type: none"> <li>- Frailer and female participants less likely to be approached despite eligibility and have more concerns about their suitability</li> <li>- Perception that risks outweigh the potential benefits</li> <li>- Recruitment processes could be improved</li> </ul>                                                                                                                                                                          | Complementary                                   |
| <b>Retention</b>    | <b>STOP</b> >40%<br><b>GO</b> <20% lost to follow-up.          | 12% loss to follow-up. Reasons predominantly unavoidable (death, ill-health).                | Loss to follow-up attributed to: <ul style="list-style-type: none"> <li>- Illness;</li> <li>- Length of trial;</li> <li>- Study not meeting expectations.</li> </ul>                                                                                                                                                                                                                                                                                                             | Complementary                                   |
| <b>Intervention</b> | <b>STOP</b> <30%<br><b>GO</b> >70% adherence over six-months.  | 74% adherence rate across the six-month exercise duration.                                   | <ul style="list-style-type: none"> <li>- IDC good use of time but limited in scope.</li> <li>- Participants felt safe and felt well supported.</li> <li>- Participants described a range of other important exercise components (see Figure 2)</li> </ul>                                                                                                                                                                                                                        | Complementary                                   |
| <b>Outcome</b>      | <b>STOP</b> <70%<br><b>GO</b> >80% outcome measure completion. | Up to 89% of secondary outcome measure data missing<br>Collection of falls data challenging. | <ul style="list-style-type: none"> <li>- Number of outcomes measured viewed as excessive.</li> <li>- Outcome testing during HD or at home preferred.</li> <li>- 52% agreed to complete a falls diary, falls not prioritised by participants.</li> <li>- STS60, ESWT and ISWT unsuitable</li> <li>- Researcher support and family involvement may increase outcome measure completion</li> <li>- Outcomes measuring ADLs and participation in social roles prioritised</li> </ul> | Complementary<br><br>Silence for PA monitoring. |

Results from the feasibility trial are colour coded to depict whether they met the 'stop' (red), 'go' (green) or 'change (orange) progression criteria.

Abbreviations: ADLs, activities of daily living; ESWT, Endurance Shuttle Walk Test; IDC, intradialytic exercise; ISWT, Incremental Shuttle Walk Test; PA, physical activity; STS60, sit to stand in sixty seconds.
